# Supplementary material for: Highly efficient synthesis of enantioenriched vicinal halohydrins via Ir-catalyzed asymmetric hydrogenation using dynamic kinetic resolution
Source: Royal Society of Chemistry journal article supplement (doi:10.1039/d4cc02529f), 2024-01-01
Supplement: d4cc02529f1.pdf [file d4cc02529f1.pdf]

# Highly Efficient Synthesis of Enantioenriched Vicinal Halohydrins via Ir-Catalyzed Asymmetric Hydrogenation Using Dynamic Kinetic Resolution

Bin He<sup>b</sup>, Gen-Qiang Chen<sup>c,\*</sup>, Xumu Zhang<sup>a,\*</sup>

<sup>a</sup>Medi-X Pingshan and Department of Chemistry, Southern University of Science and Technology, Shenzhen 518000, People's Republic of China;

<sup>b</sup>Institute of Zhejiang University-Quzhou, Quzhou, 324000, China;

<sup>c</sup>Academy for Advanced Interdisciplinary Studies and Guangdong Provincial Key Laboratory of Catalysis, Southern University of Science and Technology, Shenzhen 518055, People's Republic of China;

\*Email: chengq@sustech.edu.cn; zhangxm@sustech.edu.cn

## Content

|                                                                                                 |      |
|-------------------------------------------------------------------------------------------------|------|
| 1. General remarks.....                                                                         | S2   |
| 2. General procedure for the preparation of substrate compounds .....                           | S3   |
| 3. NMR spectra of substrate 1a-1x. ....                                                         | S12  |
| 4. General procedure for Asymmetric hydrogenation of cyclic $\alpha$ -halogenated ketones ..... | S34  |
| 5. NMR spectra of compounds 2a-2y.....                                                          | S45  |
| 6. HPLC chromatograms.....                                                                      | S71  |
| 7. Crystallographic Information .....                                                           | S122 |
| 8. References .....                                                                             | S124 |

## 1. General remarks

All reactions and manipulations which are sensitive to moisture or air were performed in an argon-filled glove box or using standard Schlenk techniques. Anhydrous *i*PrOH, EtOH, CH<sub>2</sub>Cl<sub>2</sub>, THF, dioxane, EtOAc, hexane and toluene purchased from J&K were treated with bubbled argon before used; anhydrous toluene was prepared by treating the commercially available toluene with Na and distillation. K<sub>2</sub>CO<sub>3</sub>, Cs<sub>2</sub>CO<sub>3</sub>, NaOH, NaO<sup>t</sup>Bu, KO<sup>t</sup>Bu and LiO<sup>t</sup>Bu was purchased from Sinopharm Chemical Reagent Co., Ltd. <sup>1</sup>H, <sup>13</sup>C and <sup>19</sup>F NMR spectra were recorded with a Bruker ADVANCE III (400 MHz) spectrometer with CDCl<sub>3</sub> or D<sub>2</sub>O as the solvent. NMR chemical shifts are listed in ppm relative to CHCl<sub>3</sub> (7.26 ppm for <sup>1</sup>H, and 77.0 ppm for <sup>13</sup>C) or H<sub>2</sub>O (4.79 ppm for <sup>1</sup>H). Data are reported as: multiplicity (s = singlet, d = doublet, t = triplet, q = quartet, m = multiplet), coupling constant in hertz (Hz) and signal area integration in natural numbers. <sup>13</sup>C NMR analyses were run with decoupling. HPLC analyses were performed by Agilent 1290 UPLC using Daicel chiral column, the racemates of products were prepared by reduction of the substrates with NaBH<sub>4</sub>.

## 2. General procedure for the preparation of substrate compounds

Synthesis of Compounds **1a–1q**.

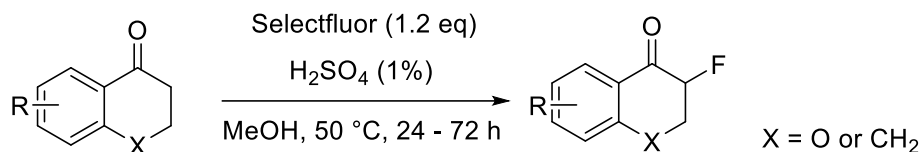

According to the reported procedure,<sup>[1]</sup> to a 50 mL-round-bottom flask fitted with a stirrer and a condenser and set under argon were added ketone (4.0 mmol, 1.0 equiv), SelectFluor (1.70 g, 4.8 mmol, 1.2 equiv), MeOH (7 mL), and conc. H<sub>2</sub>SO<sub>4</sub> (20  $\mu$ L, 0.4 mmol, 0.1 equiv). The resulting suspension was heated at 50 °C (oil bath) for 24–72 h (completion of the reaction was monitored by TLC; petroleum ether/ ethyl acetate 80:20). After the reaction mixture was cooled, the slurry was diluted with 3 mL of methanol and filtered. The obtained solid was washed with MeOH (2  $\times$  3 mL), and the filtrate was concentrated under reduced pressure. The resulting mixture was dissolved in CH<sub>2</sub>Cl<sub>2</sub> (20 mL), washed with brine, dried over MgSO<sub>4</sub>, filtered, and concentrated under reduced pressure. The crude product was purified by flash column chromatography on silica gel (petroleum ether/ethyl acetate from 95:5 to 85:15) to yield **1a–1r** as a white crystalline solid.

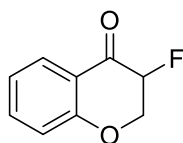

3-Fluorochroman-4-one (**1a**):<sup>[1a]</sup> White solid, 7.5 g, 90% yield. <sup>1</sup>H NMR (400 MHz, CDCl<sub>3</sub>):  $\delta$  7.91 (dd,  $J = 7.9, 1.8$  Hz, 1H), 7.53 (ddd,  $J = 8.7, 7.2, 1.8$  Hz, 1H), 7.08 (t,  $J = 7.5$  Hz, 1H), 7.00 (d,  $J = 8.4$  Hz, 1H), 5.16 (ddd,  $J = 47.0, 9.2, 4.7$  Hz, 1H), 4.70-4.47 (m, 2H). <sup>19</sup>F NMR (376 MHz, CDCl<sub>3</sub>):  $\delta$  -204.05 (ddd,  $J = 47.0, 15.9, 7.5$  Hz).

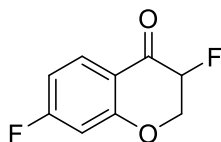

3,7-Difluorochroman-4-one (**1b**):<sup>[1b]</sup> White solid, 200 mg, 72% yield. <sup>1</sup>H NMR (400 MHz, CDCl<sub>3</sub>): δ 7.95 (dd, *J* = 8.8, 6.5 Hz, 1H), 6.82 (ddd, *J* = 8.8, 8.0, 2.4 Hz, 1H), 6.71 (dd, *J* = 9.6, 2.4 Hz, 1H), 5.13 (ddd, *J* = 46.9, 8.5, 4.7 Hz, 1H), 4.75-4.40 (m, 2H). <sup>19</sup>F NMR (376 MHz, CDCl<sub>3</sub>): δ -98.49 (m), -203.59 (ddd, *J* = 46.9, 17.3, 8.5 Hz).

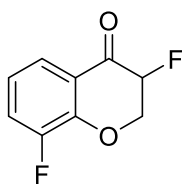

3,8-Difluorochroman-4-one (**1c**):<sup>[2]</sup> White solid, 193 mg, 70% yield. <sup>1</sup>H NMR (400 MHz, CDCl<sub>3</sub>): δ 7.71 (dt, *J* = 8.0, 1.5 Hz, 1H), 7.35 (ddd, *J* = 10.5, 8.0, 1.6 Hz, 1H), 7.04 (td, *J* = 8.0, 4.3 Hz, 1H), 5.19 (ddd, *J* = 46.8, 8.9, 4.6 Hz, 1H), 4.93-4.45 (m, 2H). <sup>19</sup>F NMR (376 MHz, CDCl<sub>3</sub>): δ -134.31 (dd, *J* = 10.1, 4.5 Hz), -203.63 (ddd, *J* = 47.2, 17.1, 7.9 Hz).

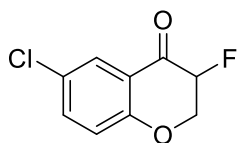

6-Chloro-3-fluorochroman-4-one (**1d**):<sup>[1b]</sup> White solid, 480 mg, 80% yield. <sup>1</sup>H NMR (400 MHz, CDCl<sub>3</sub>): δ 7.87 (d, *J* = 2.7 Hz, 1H), 7.47 (dd, *J* = 8.9, 2.7 Hz, 1H), 6.98 (d, *J* = 8.9 Hz, 1H), 5.14 (ddd, *J* = 46.9, 8.8, 4.7 Hz, 1H), 4.77-4.48 (m, 2H). <sup>19</sup>F NMR (376 MHz, CDCl<sub>3</sub>): δ -203.73 (ddd, *J* = 47.2, 17.4, 8.4 Hz).

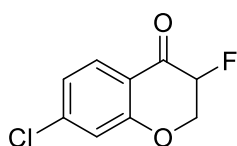

7-Chloro-3-fluorochroman-4-one (**1e**):<sup>[2]</sup> White solid, 213 mg, 76% yield. <sup>1</sup>H NMR (400 MHz, CDCl<sub>3</sub>): δ 7.84 (d, *J* = 8.4 Hz, 1H), 7.10-6.93 (m, 2H), 5.13 (ddd, *J* = 46.9,

8.7, 4.6 Hz, 1H), 4.70-4.42 (m, 2H).  $^{19}\text{F}$  NMR (376 MHz,  $\text{CDCl}_3$ ): -203.50 (ddd,  $J = 46.6, 16.9, 8.3$  Hz).

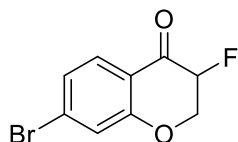

7-Bromo-3-fluorochroman-4-one (**1f**):<sup>[3]</sup> White solid, 200 mg, 75% yield.  $^1\text{H}$  NMR (400 MHz,  $\text{CDCl}_3$ ):  $\delta$  7.77 (d,  $J = 8.9$  Hz, 1H), 7.25-7.20 (m, 2H), 5.13 (ddd,  $J = 46.9, 8.7, 4.7$  Hz, 1H), 4.75-4.47 (m, 2H).  $^{19}\text{F}$  NMR (376 MHz,  $\text{CDCl}_3$ ):  $\delta$  -203.50 (ddd,  $J = 46.4, 17.5, 7.9$  Hz).

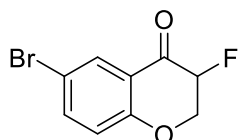

6-Bromo-3-fluorochroman-4-one (**1g**):<sup>[2]</sup> White solid, 430 mg, 68% yield.  $^1\text{H}$  NMR (400 MHz,  $\text{CDCl}_3$ ):  $\delta$  8.20-7.89 (m, 1H), 7.70-7.46 (m, 1H), 6.99-6.85 (m, 1H), 5.26-4.92 (m, 1H), 4.76-4.44 (m, 2H).  $^{19}\text{F}$  NMR (376 MHz,  $\text{CDCl}_3$ ):  $\delta$  -203.71 (m).

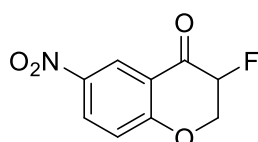

3-Fluoro-7-nitrochroman-4-one (**1h**):<sup>[3]</sup> White solid, 430 mg, 78% yield.  $^1\text{H}$  NMR (400 MHz,  $\text{CDCl}_3$ ):  $\delta$  8.80 (d,  $J = 2.8$  Hz, 1H), 8.39 (dd,  $J = 9.2, 2.8$  Hz, 1H), 7.18 (d,  $J = 9.2$  Hz, 1H), 5.30-5.03 (m, 1H), 4.80-4.71 (m, 2H).  $^{19}\text{F}$  NMR (376 MHz,  $\text{CDCl}_3$ ):  $\delta$  -202.73 (ddd,  $J = 46.0, 16.4, 11.9$  Hz).

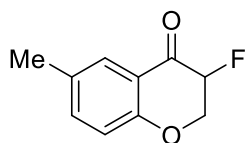

3-Fluoro-6-methylchroman-4-one (**1i**):<sup>[1b]</sup> White solid, 405 mg, 75% yield. <sup>1</sup>H NMR (400 MHz, CDCl<sub>3</sub>): δ 7.70 (s, 1H), 7.34 (d, *J* = 8.5 Hz, 1H), 6.91 (d, *J* = 8.5 Hz, 1H), 5.14 (dddd, *J* = 47.1, 9.3, 4.7, 2.5 Hz, 1H), 4.72-4.34 (m, 2H), 2.32 (s, 3H). <sup>19</sup>F NMR (376 MHz, CDCl<sub>3</sub>): δ -204.07 (ddd, *J* = 47.2, 16.5, 7.4 Hz).

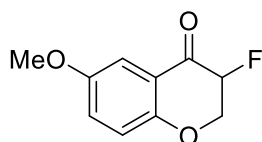

3-Fluoro-6-methoxychroman-4-one (**1j**):<sup>[3]</sup> White solid, 178 mg, 65% yield. <sup>1</sup>H NMR (400 MHz, CDCl<sub>3</sub>): δ 7.31 (d, *J* = 3.2 Hz, 1H), 7.14 (dd, *J* = 9.1, 3.2 Hz, 1H), 6.95 (d, *J* = 9.1 Hz, 1H), 5.14 (ddd, *J* = 47.0, 9.1, 4.7 Hz, 1H), 4.74-4.41 (m, 2H), 3.81 (s, 3H). <sup>19</sup>F NMR (376 MHz, CDCl<sub>3</sub>): δ -203.86 (ddd, *J* = 47.2, 16.8, 8.1 Hz).

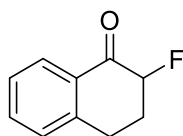

2-Fluoro-3,4-dihydronaphthalen-1(2H)-one (**1k**):<sup>[1b]</sup> Colourless crystal, 697 mg, 85% yield. <sup>1</sup>H NMR (400 MHz, CDCl<sub>3</sub>): δ 8.07 (dd, *J* = 7.8, 1.4 Hz, 1H), 7.53 (td, *J* = 7.5, 1.5 Hz, 1H), 7.36 (t, *J* = 7.5 Hz, 1H), 7.27 (d, *J* = 7.7 Hz, 1H), 5.15 (ddd, *J* = 47.9, 12.7, 5.1 Hz, 1H), 3.13 (dd, *J* = 9.5, 4.1 Hz, 2H), 2.58 (dddt, *J* = 12.5, 10.3, 5.1, 4.2 Hz, 1H), 2.36 (tddd, *J* = 12.6, 9.3, 7.8, 6.7 Hz, 1H). <sup>19</sup>F NMR (376 MHz, CDCl<sub>3</sub>): δ -190.32 (dt, *J* = 48.1, 9.1 Hz).

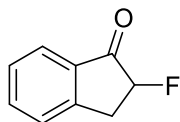

2-Fluoro-2,3-dihydro-1H-inden-1-one (**1l**):<sup>[1b]</sup> Colourless crystal, 2.8 g, 92% yield. <sup>1</sup>H NMR (400 MHz, CDCl<sub>3</sub>): δ 7.80 (d, *J* = 7.7 Hz, 1H), 7.67 (t, *J* = 7.5 Hz, 1H), 7.46 (d, *J* = 7.7 Hz, 1H), 7.44 (t, *J* = 7.5 Hz, 1H), 5.27 (ddd, *J* = 51.1, 7.8, 4.4 Hz, 1H), 3.63 (dt,

$J = 16.9, 7.5$  Hz, 1H), 3.23 (ddd,  $J = 22.2, 16.9, 4.4$  Hz, 1H).  $^{19}\text{F}$  NMR (376 MHz,  $\text{CDCl}_3$ ):  $\delta$  -193.99 (ddd,  $J = 51.1, 23.9, 7.2$  Hz).

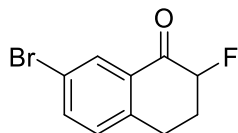

7-Bromo-2-fluoro-3,4-dihydronaphthalen-1(2H)-one (**1m**):<sup>[1b]</sup> Colourless crystal, 968 mg, 80% yield.  $^1\text{H}$  NMR (400 MHz,  $\text{CDCl}_3$ ):  $\delta$  8.18 (dt,  $J = 5.5, 2.3$  Hz, 1H), 7.63 (ddd,  $J = 8.2, 3.0, 1.7$  Hz, 1H), 7.16 (d,  $J = 8.2$  Hz, 1H), 5.14 (dddt,  $J = 47.7, 12.6, 5.1, 1.2$  Hz, 1H), 3.21-3.03 (m, 2H), 2.67-2.49 (m, 1H), 2.42-2.22 (m, 1H).  $^{19}\text{F}$  NMR (376 MHz,  $\text{CDCl}_3$ ):  $\delta$  -190.70 (ddd,  $J = 48.3, 11.2, 6.9$  Hz).

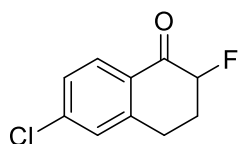

6-Chloro-2-fluoro-3,4-dihydronaphthalen-1(2H)-one (**1n**):<sup>[4]</sup> Colourless crystal, 842 mg, 85% yield.  $^1\text{H}$  NMR (400 MHz,  $\text{CDCl}_3$ ):  $\delta$  8.00 (d,  $J = 8.4$  Hz, 1H), 7.33 (dd,  $J = 8.4, 2.0$  Hz, 1H), 7.28 (br, 1H), 5.12 (ddd,  $J = 47.7, 12.5, 5.1$  Hz, 1H), 3.21-2.99 (m, 2H), 2.66-2.49 (m, 1H), 2.44-2.24 (m, 1H).  $^{19}\text{F}$  NMR (376 MHz,  $\text{CDCl}_3$ ):  $\delta$  -190.70 (ddd,  $J = 48.3, 11.2, 6.9$  Hz).

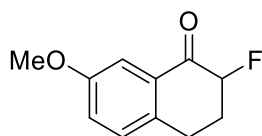

2-Fluoro-7-methoxy-3,4-dihydronaphthalen-1(2H)-one (**1o**):<sup>[5]</sup> Colourless crystal, 737 mg, 76% yield.  $^1\text{H}$  NMR (400 MHz,  $\text{CDCl}_3$ ):  $\delta$  7.52 (d,  $J = 2.8$  Hz, 1H), 7.18 (d,  $J = 8.5$  Hz, 1H), 7.10 (dd,  $J = 8.5, 2.8$  Hz, 1H), 5.13 (ddd,  $J = 47.9, 12.8, 5.1$  Hz, 1H), 3.85 (s, 3H), 3.06 (dd,  $J = 9.4, 4.2$  Hz, 2H), 2.63-2.49 (m, 1H), 2.43-2.26 (m, 1H).  $^{19}\text{F}$  NMR (376 MHz,  $\text{CDCl}_3$ ):  $\delta$  -190.41 (m).

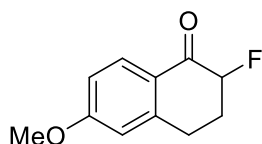

2-Fluoro-6-methoxy-3,4-dihydronaphthalen-1(2H)-one (**1p**):<sup>[5]</sup> Colourless crystal, 819 mg, 84% yield. <sup>1</sup>H NMR (400 MHz, CDCl<sub>3</sub>): δ 8.04 (d, *J* = 8.8 Hz, 1H), 6.87 (dd, *J* = 8.8, 2.5 Hz, 1H), 6.70 (d, *J* = 2.5 Hz, 1H), 5.09 (ddd, *J* = 48.0, 12.4, 5.1 Hz, 1H), 3.86 (s, 3H), 3.08 (dd, *J* = 9.2, 4.2 Hz, 2H), 2.61-2.47 (m, 1H), 2.41-2.24 (m, 1H). <sup>19</sup>F NMR (376 MHz, CDCl<sub>3</sub>): δ -190.37 (ddd, *J* = 47.7, 10.2, 6.7 Hz).

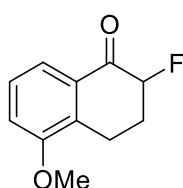

2-Fluoro-5-methoxy-3,4-dihydronaphthalen-1(2H)-one (**1q**):<sup>[1a]</sup> Colourless crystal, 719 mg, 74% yield. <sup>1</sup>H NMR (400 MHz, CDCl<sub>3</sub>): δ 7.65 (dd, *J* = 7.9, 1.1 Hz, 1H), 7.32 (t, *J* = 8.0 Hz, 1H), 7.05 (dd, *J* = 8.1, 1.0 Hz, 1H), 5.15 (ddd, *J* = 48.3, 13.1, 5.2 Hz, 1H), 3.87 (s, 3H), 3.27 (dtd, *J* = 18.0, 4.9, 3.3 Hz, 1H), 2.95-2.70 (m, 1H), 2.65-2.50 (m, 1H), 2.39-2.18 (m, 1H). <sup>19</sup>F NMR (376 MHz, CDCl<sub>3</sub>): δ -191.03 (ddt, *J* = 47.3, 10.2, 5.4 Hz).

#### Synthesis of Compounds **1r–1x**.

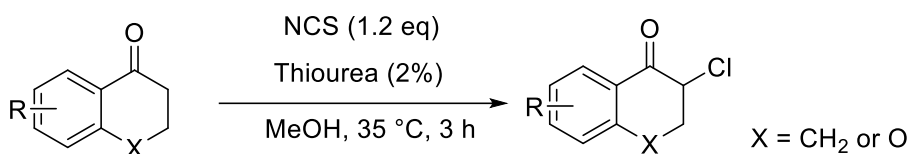

According to the reported procedure,<sup>[6]</sup> a MeOH solution (100 mL) containing ketone (10 mmol), thiourea (15 mg, 0.2 mmol), and N-chlorosuccinimide (1.60 g, 12 mmol) was heated by oil bath under N<sub>2</sub> atmosphere at 35 °C, for 3 h. The solution was concentrated under a reduced pressure, then AcOEt (50 mL) and H<sub>2</sub>O (20 mL) were added and stirred for 10 min. The organic layer was separated, and the aqueous phase was extracted with AcOEt (2 × 50 mL). The combined organic portions were dried over



MgSO<sub>4</sub> and concentrated to give a crude product. Purification by silica gel column chromatography (eluent: Hexane/AcOEt = 5/1) gave the product **1r-1x**.

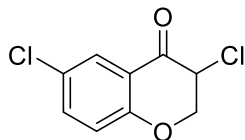

3,6-Dichlorochroman-4-one (**1r**): White solid, 480 mg, 45% yield. <sup>1</sup>H NMR (400 MHz, CDCl<sub>3</sub>): δ 7.89 (d, *J* = 2.6 Hz, 1H), 7.48 (dd, *J* = 8.9, 2.7 Hz, 1H), 7.00 (d, *J* = 8.8 Hz, 1H), 4.67 (dd, *J* = 11.4, 3.1 Hz, 1H), 4.61-4.50 (m, 2H). <sup>13</sup>C NMR (100 MHz, CDCl<sub>3</sub>): δ 184.5, 159.4, 136.8, 128.0, 127.4, 119.9, 119.8, 71.2, 54.8. HRMS (ESI/ion trap): *m/z* [M + H]<sup>+</sup> calcd for C<sub>9</sub>H<sub>7</sub>Cl<sub>2</sub>O<sub>2</sub> 216.9823, found 216.9814.

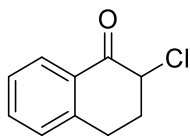

2-Chloro-3,4-dihydronaphthalen-1(2H)-one (**1s**):<sup>[6]</sup> Light yellow liquid, 5.8 g, 95% yield. <sup>1</sup>H NMR (400 MHz, CDCl<sub>3</sub>): δ 8.07 (dd, *J* = 7.9, 1.4 Hz, 1H), 7.51 (td, *J* = 7.5, 1.5 Hz, 1H), 7.33 (td, *J* = 7.6, 1.1 Hz, 1H), 7.26 (d, *J* = 7.7 Hz, 1H), 4.62 (dd, *J* = 7.8, 3.9 Hz, 1H), 3.27 (ddd, *J* = 17.1, 8.0, 4.6 Hz, 1H), 2.98 (ddd, *J* = 17.1, 7.0, 4.7 Hz, 1H), 2.63-2.51 (m, 1H), 2.50-2.39 (m, 1H).

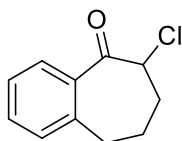

6-Chloro-6,7,8,9-tetrahydro-5H-benzo[7]annulen-5-one (**1t**):<sup>[7]</sup> Light yellow liquid, 834 g, 86% yield. <sup>1</sup>H NMR (400 MHz, CDCl<sub>3</sub>): δ 7.64 (dd, *J* = 7.7, 1.5 Hz, 1H), 7.41 (td, *J* = 7.5, 1.5 Hz, 1H), 7.30 (td, *J* = 7.6, 1.2 Hz, 1H), 7.20 (dd, *J* = 7.5, 1.1 Hz, 1H), 4.80 (dd, *J* = 8.7, 4.7 Hz, 1H), 3.02 (ddd, *J* = 15.8, 7.7, 3.4 Hz, 1H), 2.92 (ddd, *J* = 15.8, 9.6, 3.4 Hz, 1H), 2.39 (dddd, *J* = 14.3, 9.7, 6.1, 4.7 Hz, 1H), 2.20 (ddt, *J* = 14.0, 8.7, 5.3 Hz, 1H), 2.11-1.87 (m, 2H).

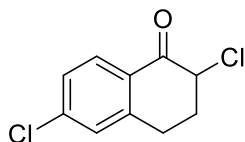

2,6-Dichloro-3,4-dihydronaphthalen-1(2H)-one (**1u**): White solid, 952 mg, 89% yield.  $^1\text{H}$  NMR (400 MHz,  $\text{CDCl}_3$ ):  $\delta$  8.02 (d,  $J = 8.4$  Hz, 1H), 7.51-7.09 (m, 2H), 4.61 (dd,  $J = 7.3, 3.8$  Hz, 1H), 3.27 (ddd,  $J = 17.3, 8.4, 4.6$  Hz, 1H), 2.95 (ddd,  $J = 17.0, 6.6, 5.0$  Hz, 1H), 2.63-2.50 (m, 1H), 2.52-2.39 (m, 1H).  $^{13}\text{C}$  NMR (100 MHz,  $\text{CDCl}_3$ )  $\delta$  189.9, 144.8, 140.8, 130.3, 129.0, 128.8, 127.9, 59.3, 32.1, 26.1.

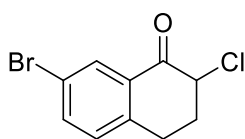

7-Bromo-2-chloro-3,4-dihydronaphthalen-1(2H)-one (**1v**):<sup>[7]</sup> White solid, 908 mg, 88% yield.  $^1\text{H}$  NMR (400 MHz,  $\text{CDCl}_3$ ):  $\delta$  8.19 (d,  $J = 2.2$  Hz, 1H), 7.62 (dd,  $J = 8.2, 2.2$  Hz, 1H), 7.17 (d,  $J = 8.2$  Hz, 1H), 4.61 (dd,  $J = 7.3, 3.8$  Hz, 1H), 3.24 (ddd,  $J = 17.3, 8.3, 4.6$  Hz, 1H), 2.94 (ddd,  $J = 17.3, 6.5, 4.7$  Hz, 1H), 2.63-2.50 (m, 1H), 2.52-2.39 (m, 1H).

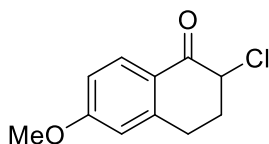

2-Chloro-6-methoxy-3,4-dihydronaphthalen-1(2H)-one (**1w**):<sup>[6]</sup> White solid, 952 mg, 89% yield.  $^1\text{H}$  NMR (400 MHz,  $\text{CDCl}_3$ ):  $\delta$  8.05 (d,  $J = 8.8$  Hz, 1H), 6.86 (dd,  $J = 8.8, 2.5$  Hz, 1H), 6.70 (dd,  $J = 2.4, 1.1$  Hz, 1H), 4.58 (dd,  $J = 7.4, 3.9$  Hz, 1H), 3.86 (s, 3H), 3.25 (ddd,  $J = 17.1, 8.4, 4.5$  Hz, 1H), 2.93 (ddd,  $J = 17.0, 6.7, 4.6$  Hz, 1H), 2.61-2.48 (m, 1H), 2.49-2.33 (m, 1H).

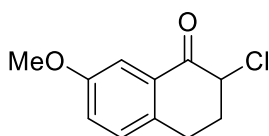

2-Chloro-7-methoxy-3,4-dihydronaphthalen-1(2H)-one (**1x**):<sup>[7]</sup> White solid, 1.5 g, 90% yield. <sup>1</sup>H NMR (400 MHz, CDCl<sub>3</sub>): δ 7.53 (d, *J* = 2.8 Hz, 1H), 7.17 (d, *J* = 8.4 Hz, 1H), 7.09 (dd, *J* = 8.5, 2.8 Hz, 1H), 4.61 (dd, *J* = 7.6, 3.8 Hz, 1H), 3.83 (s, 3H), 3.20 (ddd, *J* = 16.9, 8.0, 4.5 Hz, 1H), 2.92 (ddd, *J* = 16.9, 6.8, 4.6 Hz, 1H), 2.63-2.49 (m, 1H), 2.49-2.32 (m, 1H).

### 3. NMR spectra of substrates 1a-1x.

$^1\text{H}$  NMR (400 MHz,  $\text{CDCl}_3$ ) of compound **1a**

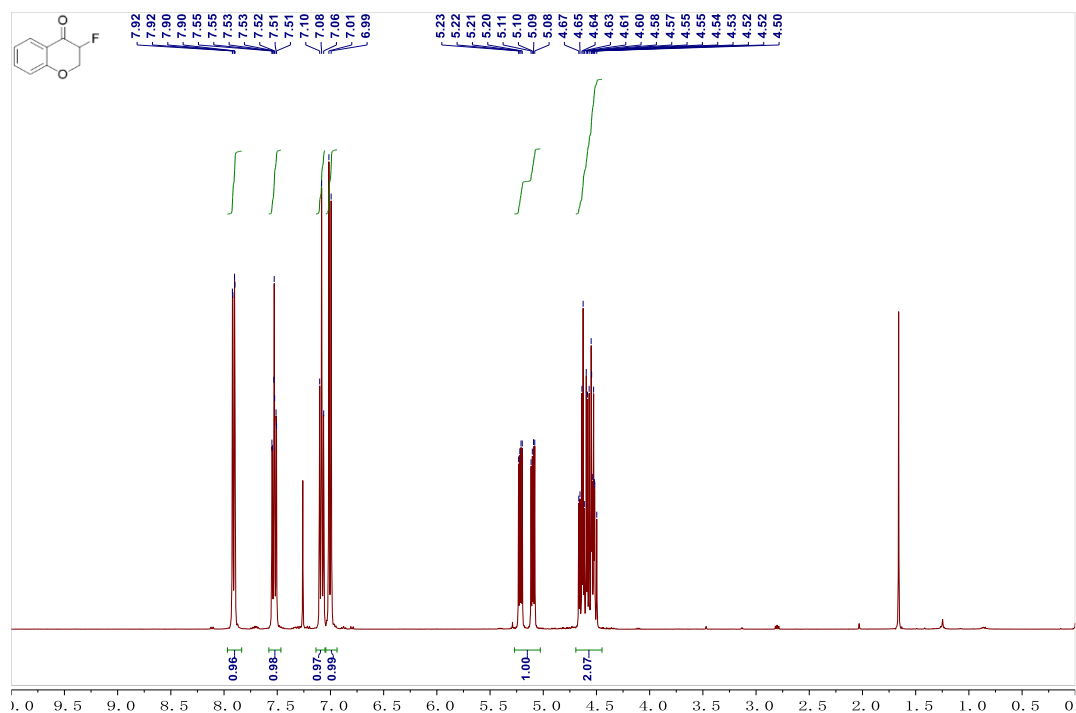

$^{19}\text{F}$  NMR (400 MHz,  $\text{CDCl}_3$ ) of compound **1a**

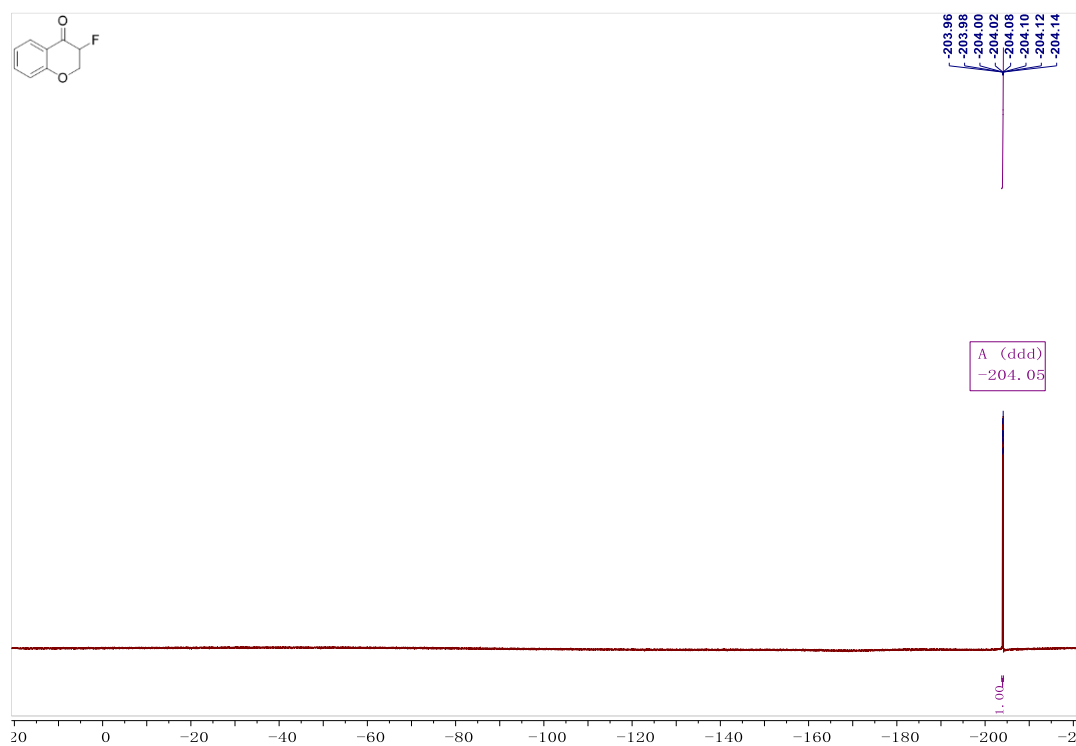

<sup>1</sup>H NMR (400 MHz, CDCl<sub>3</sub>) of compound **1b**

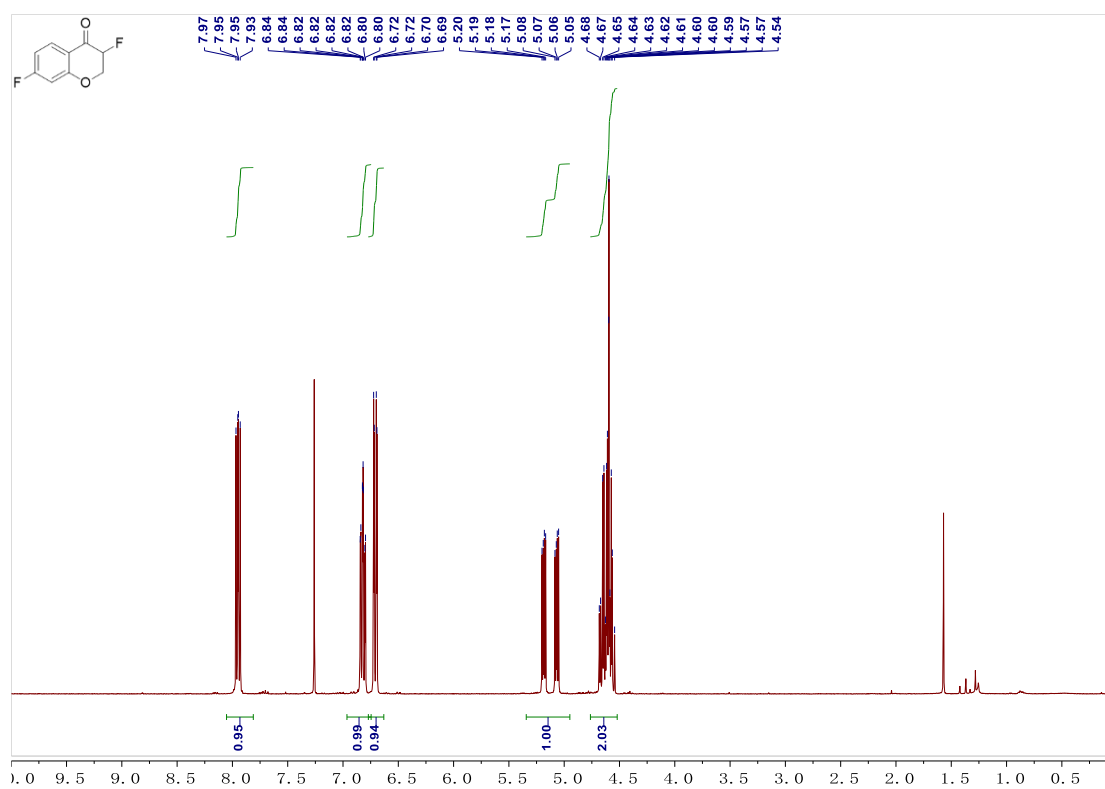

<sup>19</sup>F NMR (400 MHz, CDCl<sub>3</sub>) of compound **1b**

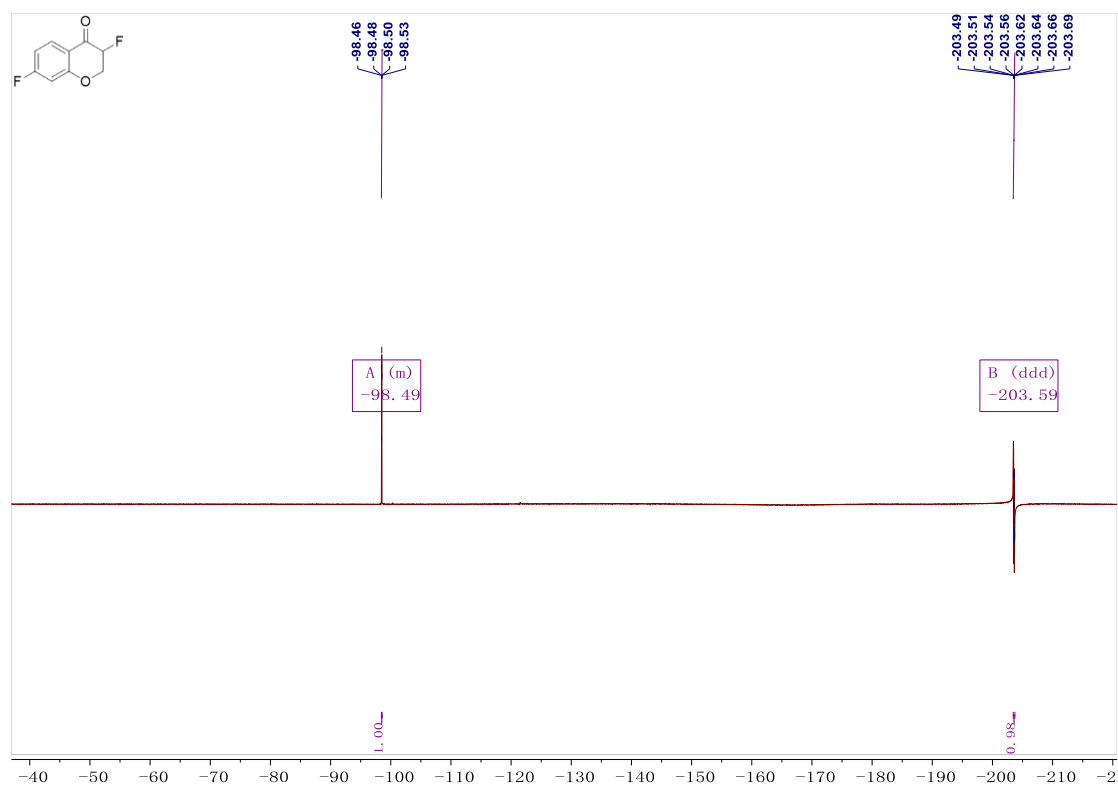

<sup>1</sup>H NMR (400 MHz, CDCl<sub>3</sub>) of compound **1c**

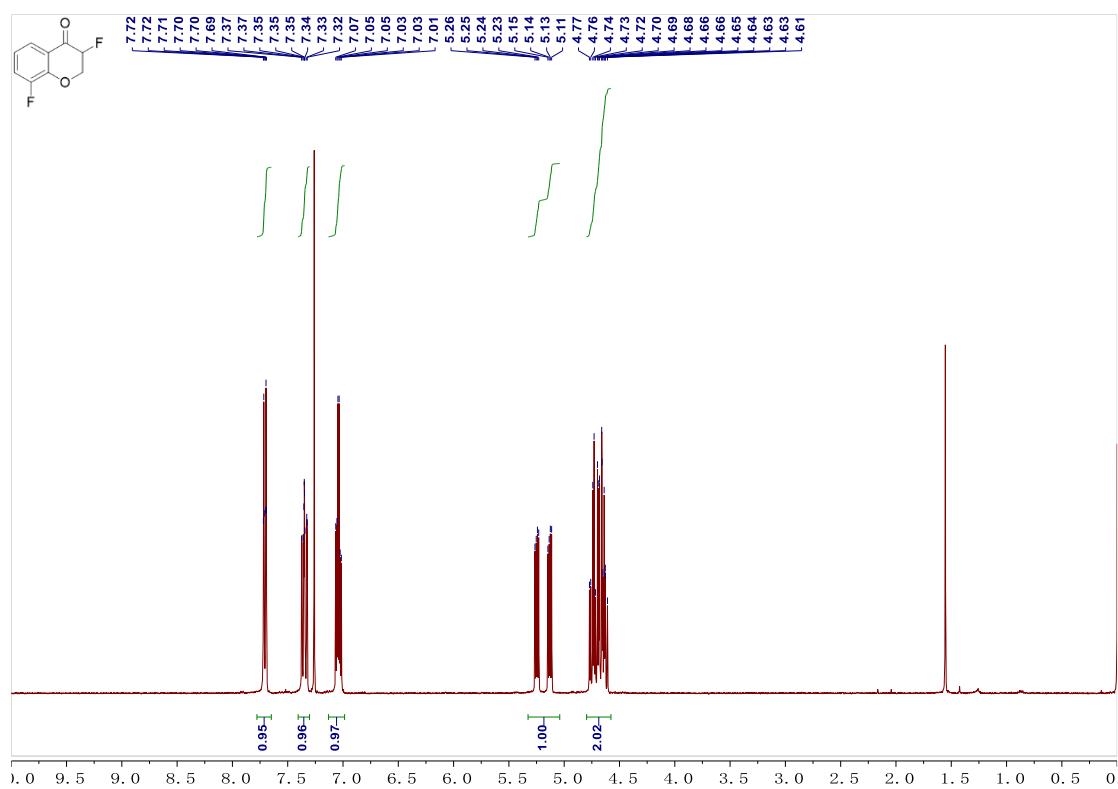

<sup>19</sup>F NMR (400 MHz, CDCl<sub>3</sub>) of compound **1c**

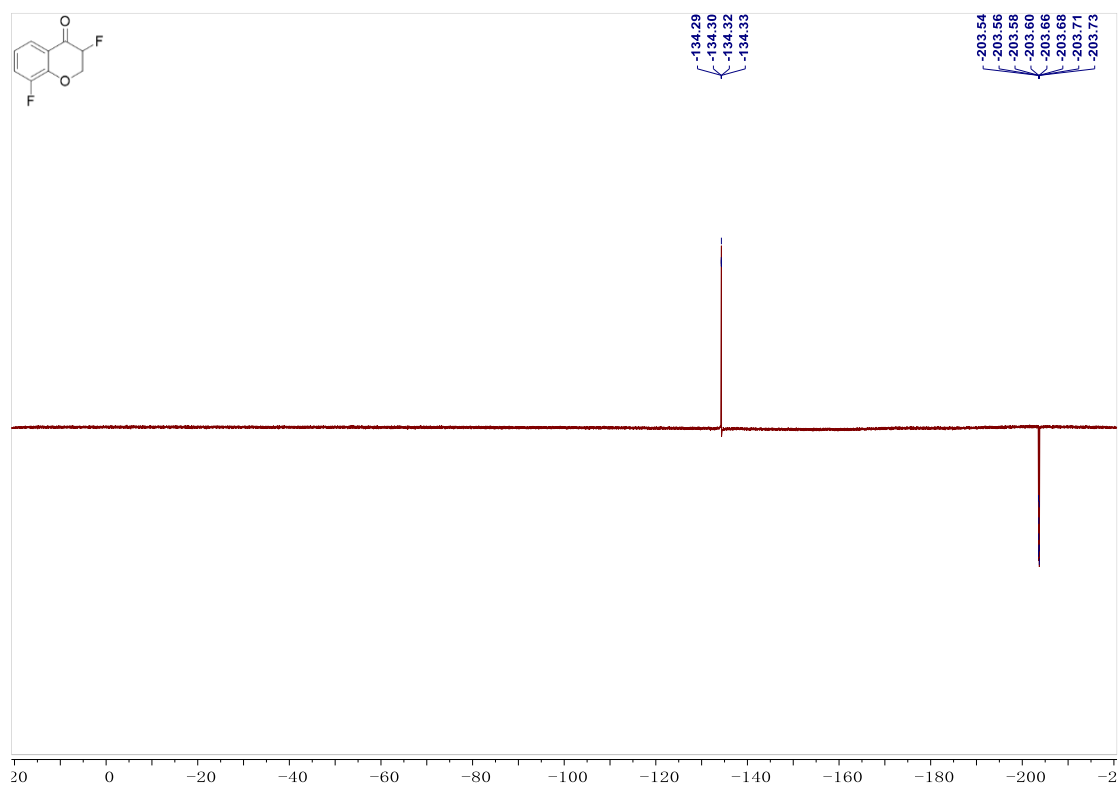

<sup>1</sup>H NMR (400 MHz, CDCl<sub>3</sub>) of compound **1d**

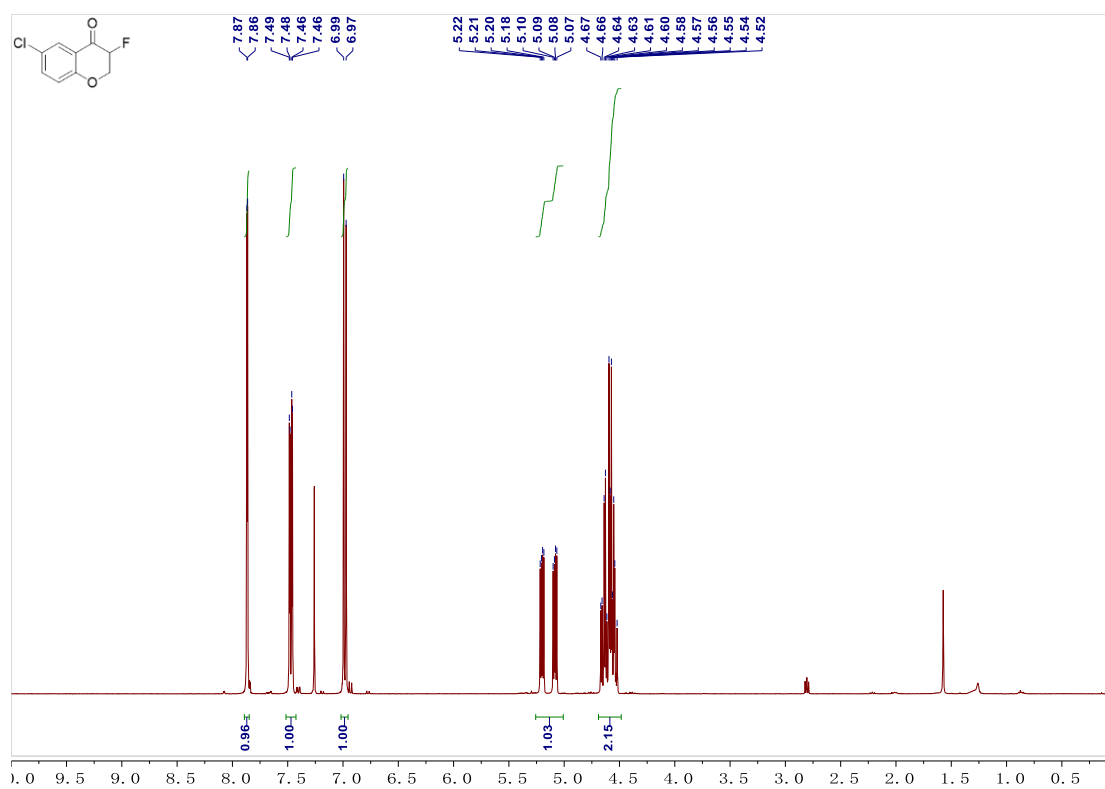

<sup>19</sup>F NMR (400 MHz, CDCl<sub>3</sub>) of compound **1d**

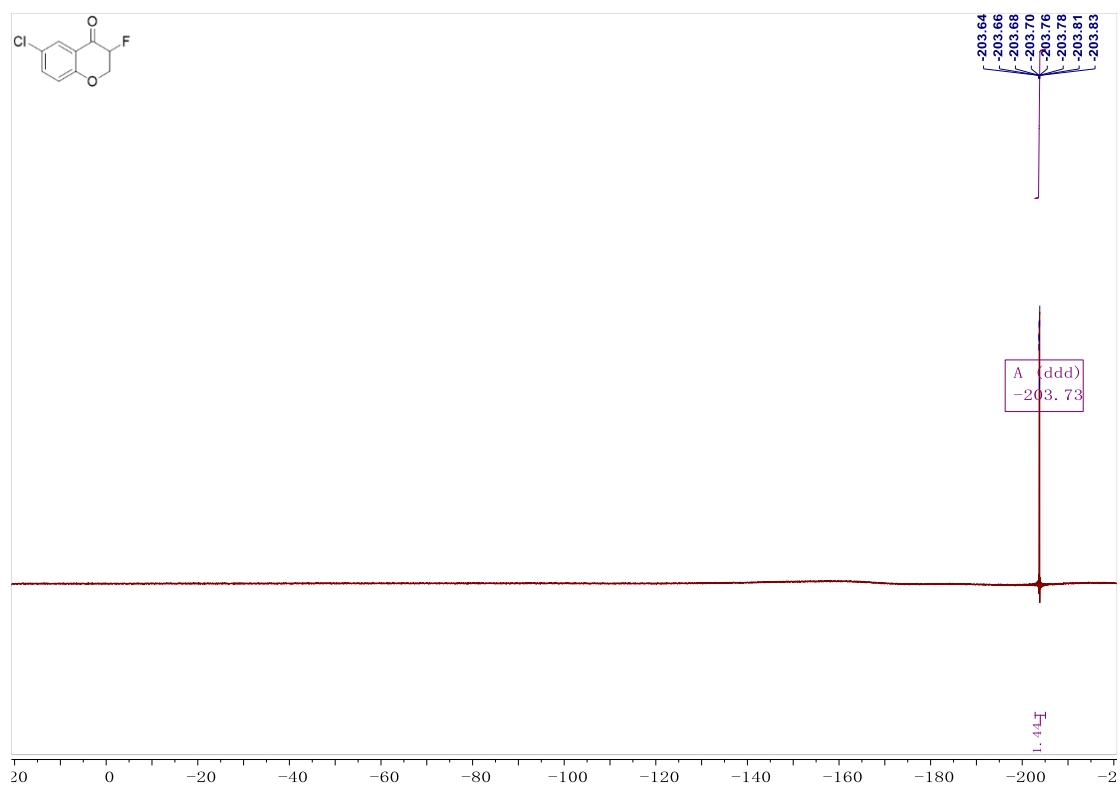

<sup>1</sup>H NMR (400 MHz, CDCl<sub>3</sub>) of compound **1e**

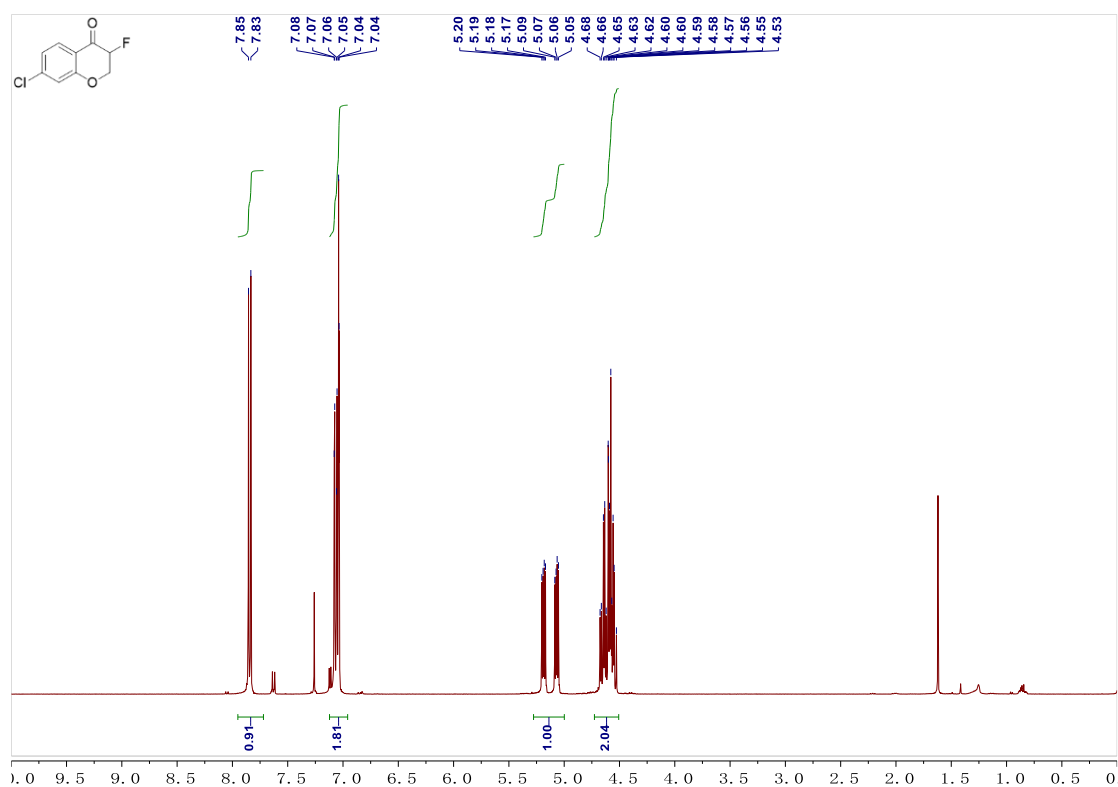

<sup>19</sup>F NMR (400 MHz, CDCl<sub>3</sub>) of compound **1e**

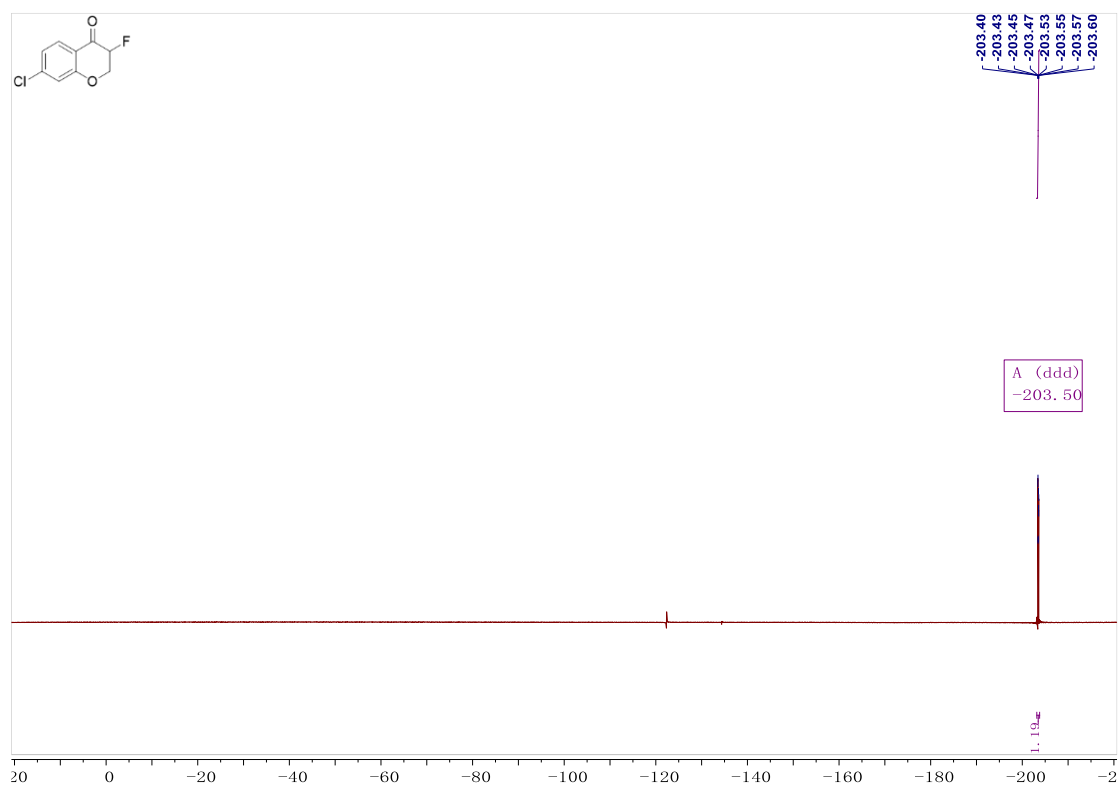



$^1\text{H}$  NMR (400 MHz,  $\text{CDCl}_3$ ) of compound **1f**

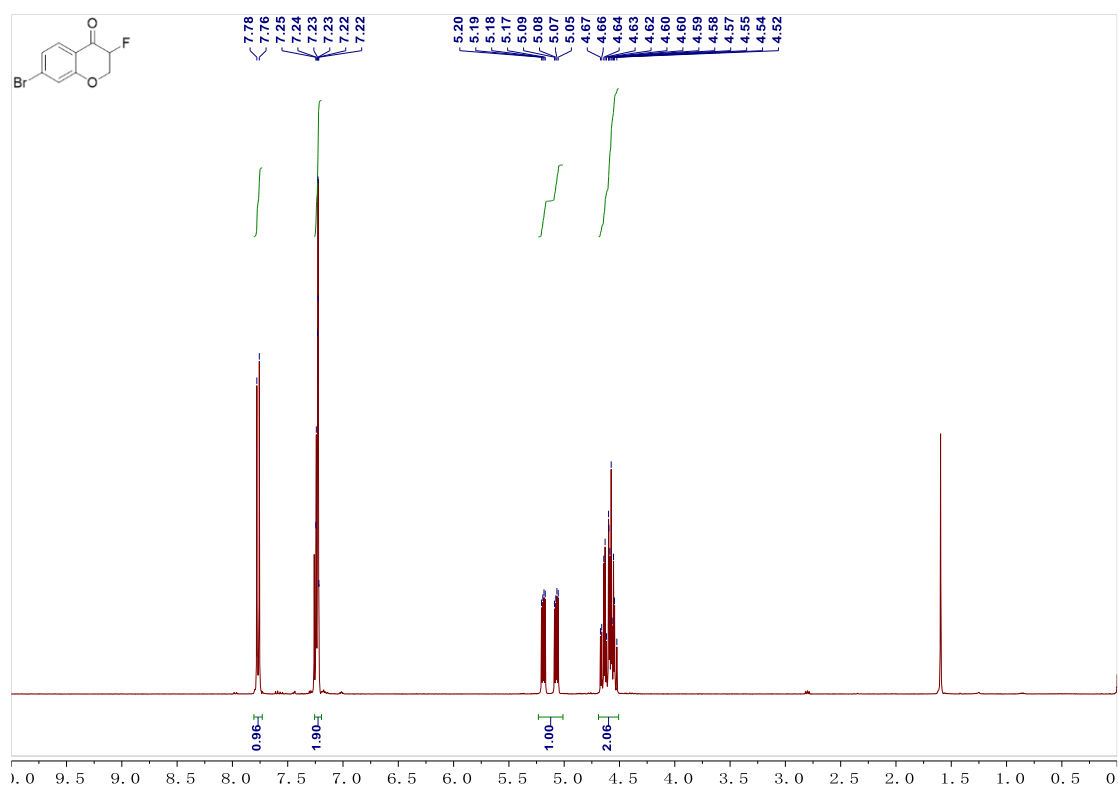

$^{19}\text{F}$  NMR (400 MHz,  $\text{CDCl}_3$ ) of compound **1f**

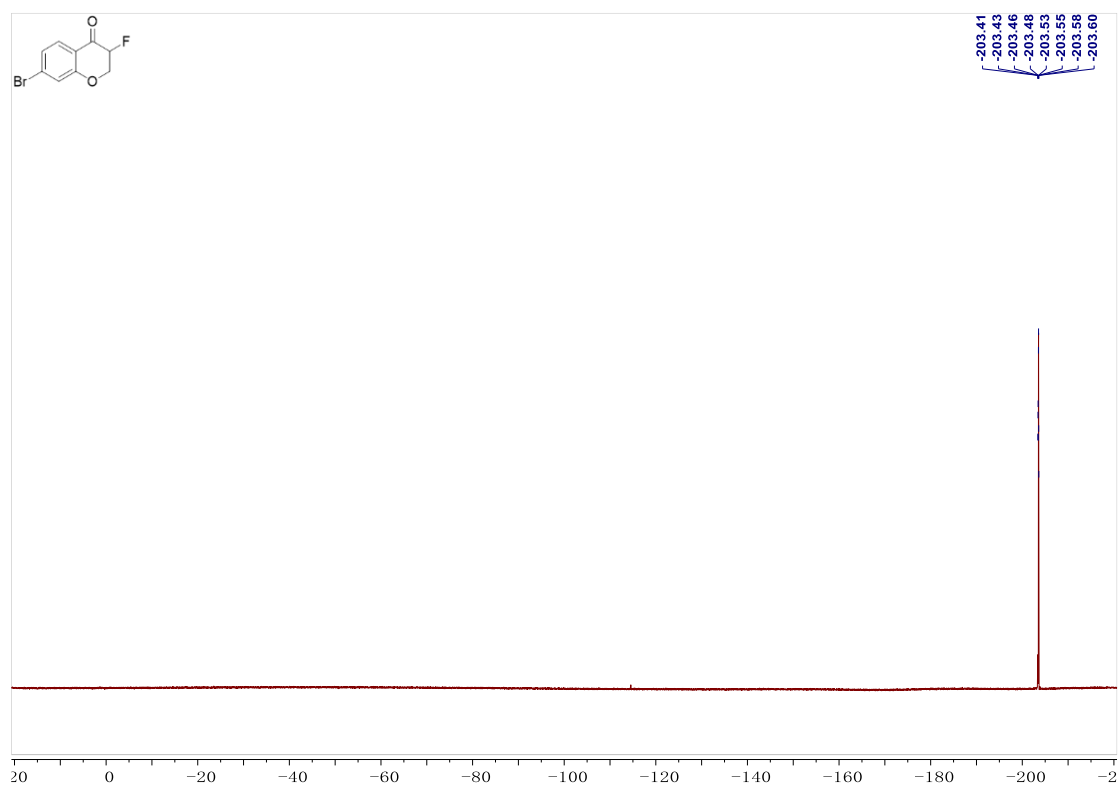

$^1\text{H}$  NMR (400 MHz,  $\text{CDCl}_3$ ) of compound **1g**

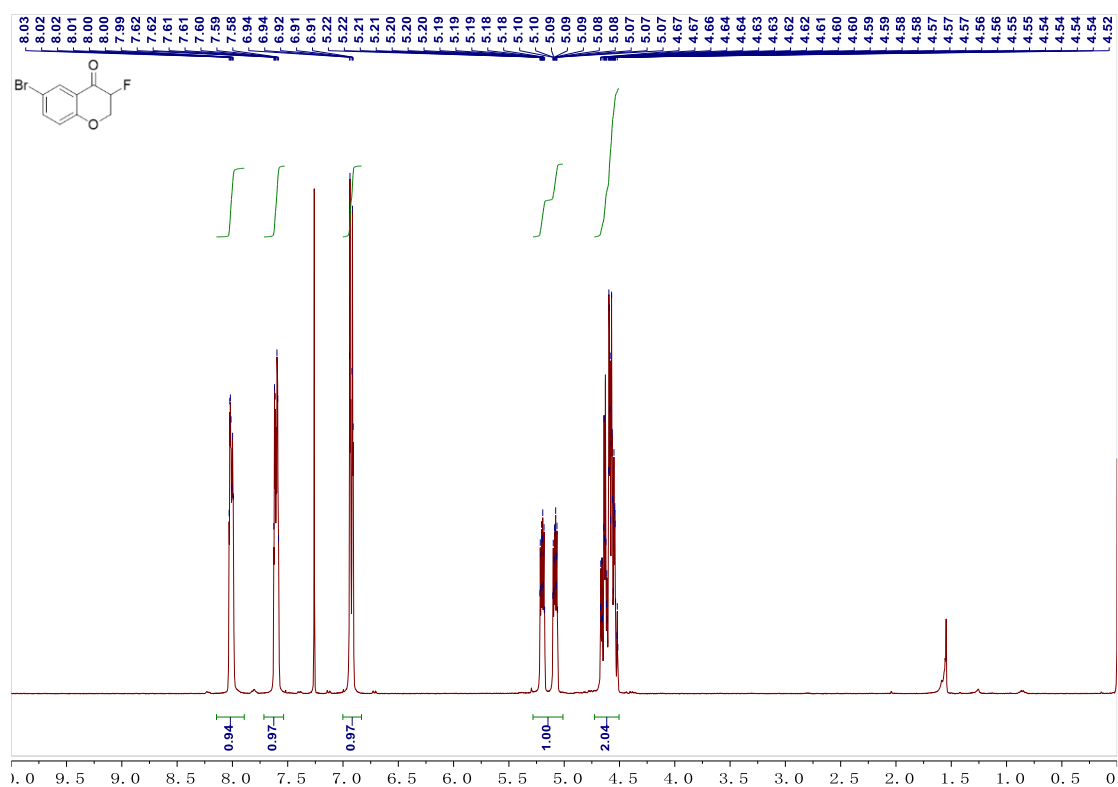

$^{19}\text{F}$  NMR (400 MHz,  $\text{CDCl}_3$ ) of compound **1g**

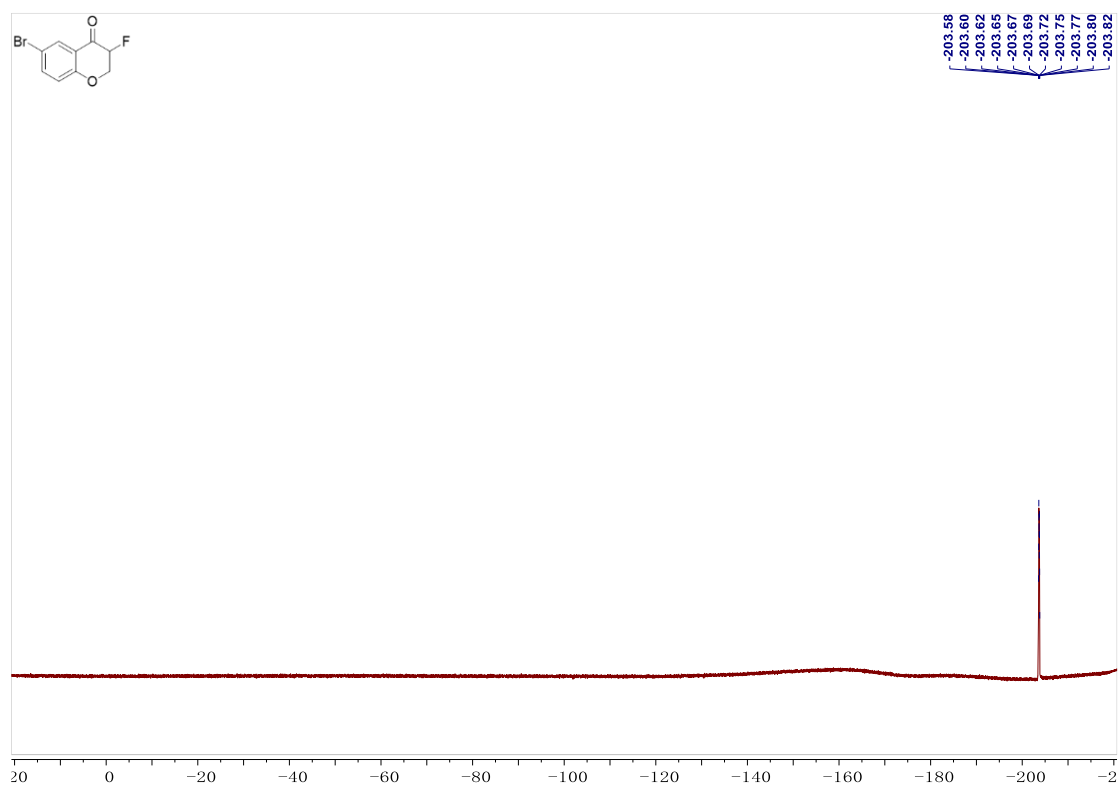

<sup>1</sup>H NMR (400 MHz, CDCl<sub>3</sub>) of compound **1h**

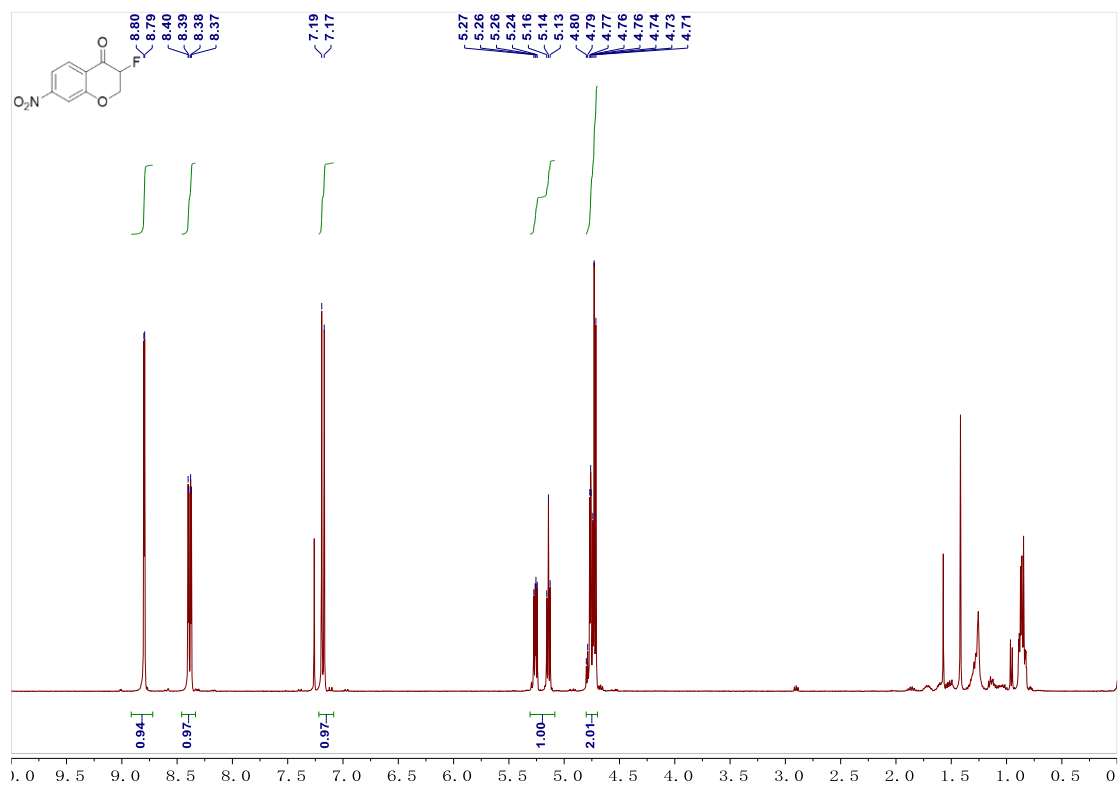

<sup>19</sup>F NMR (400 MHz, CDCl<sub>3</sub>) of compound **1h**

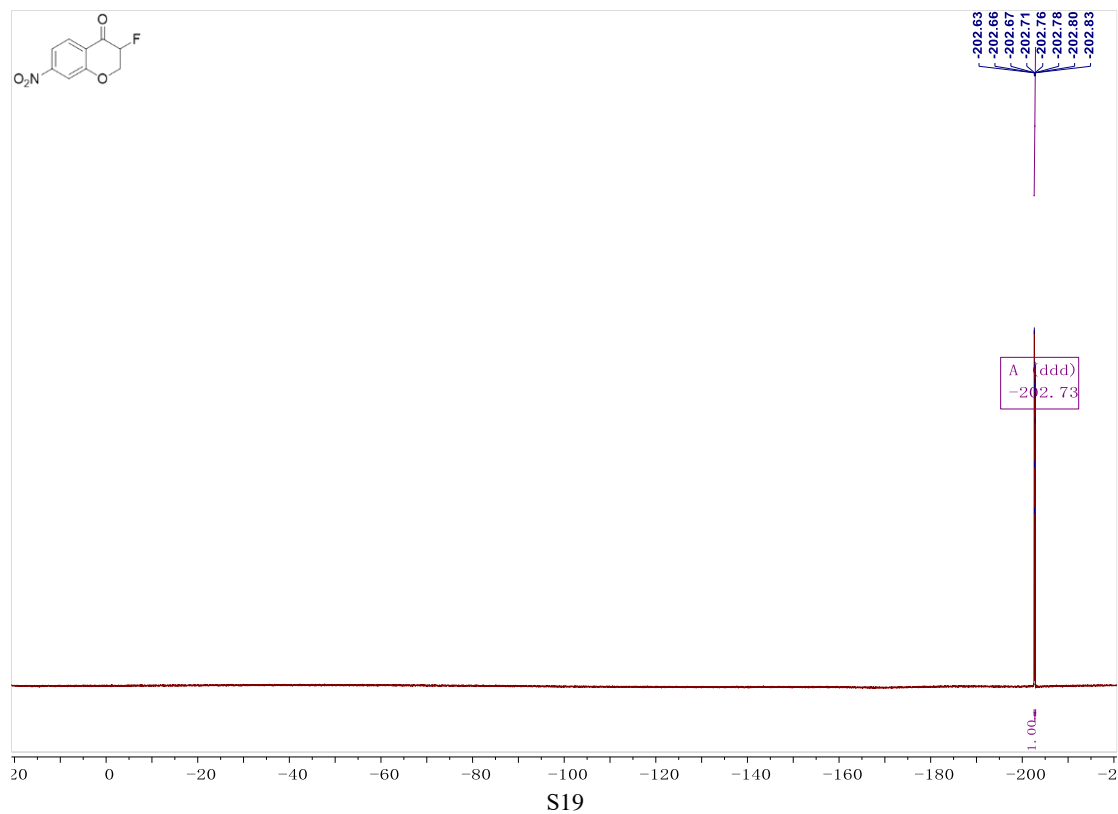

$^1\text{H}$  NMR (400 MHz,  $\text{CDCl}_3$ ) of compound **1i**

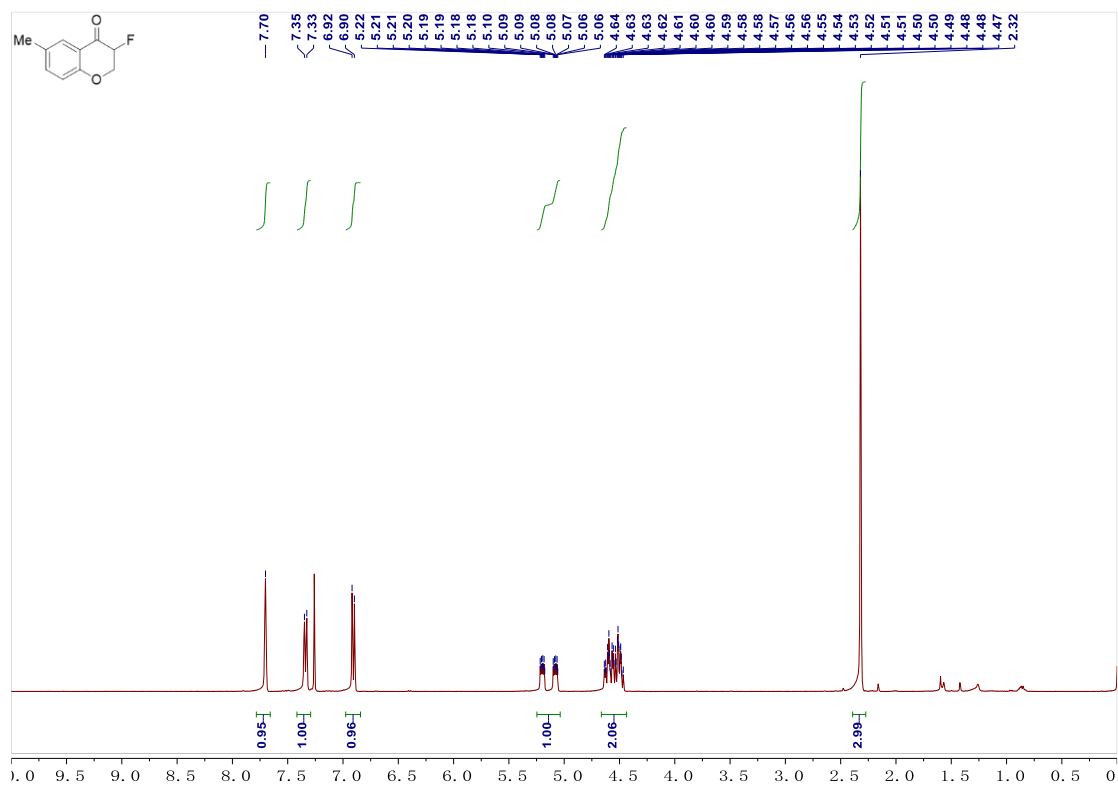

$^{19}\text{F}$  NMR (400 MHz,  $\text{CDCl}_3$ ) of compound **1i**

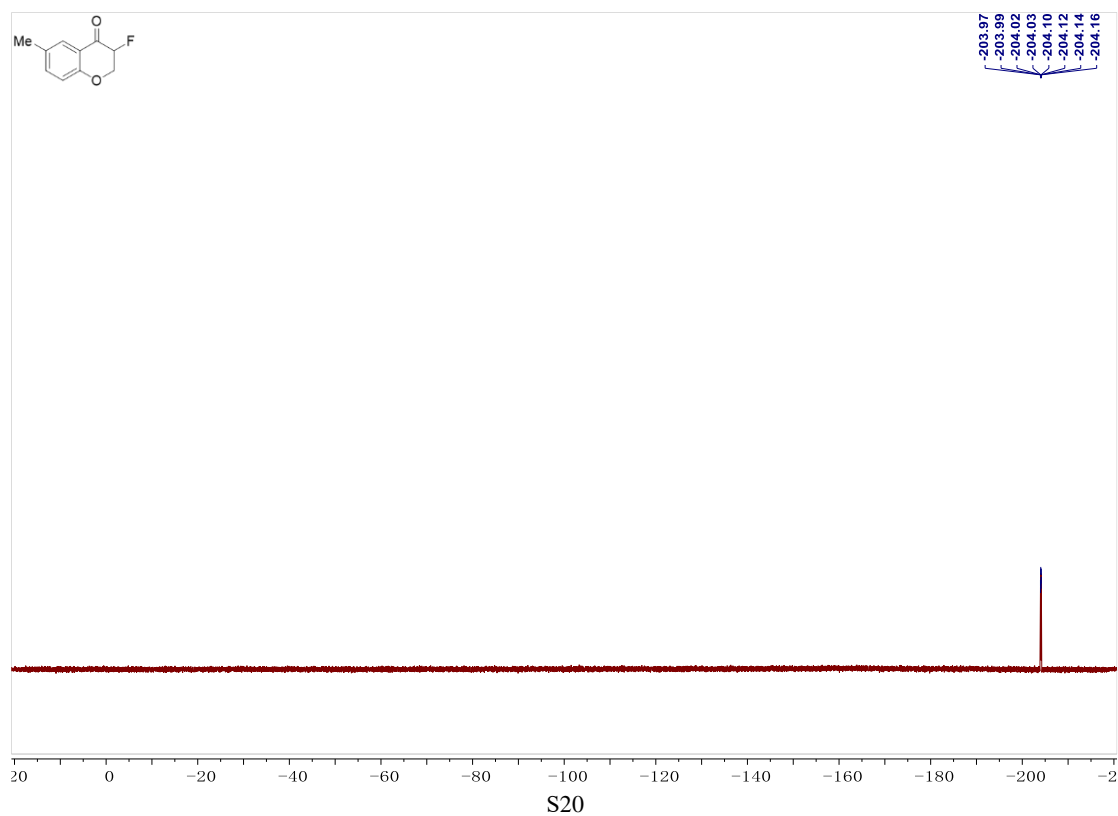

<sup>1</sup>H NMR (400 MHz, CDCl<sub>3</sub>) of compound **1j**

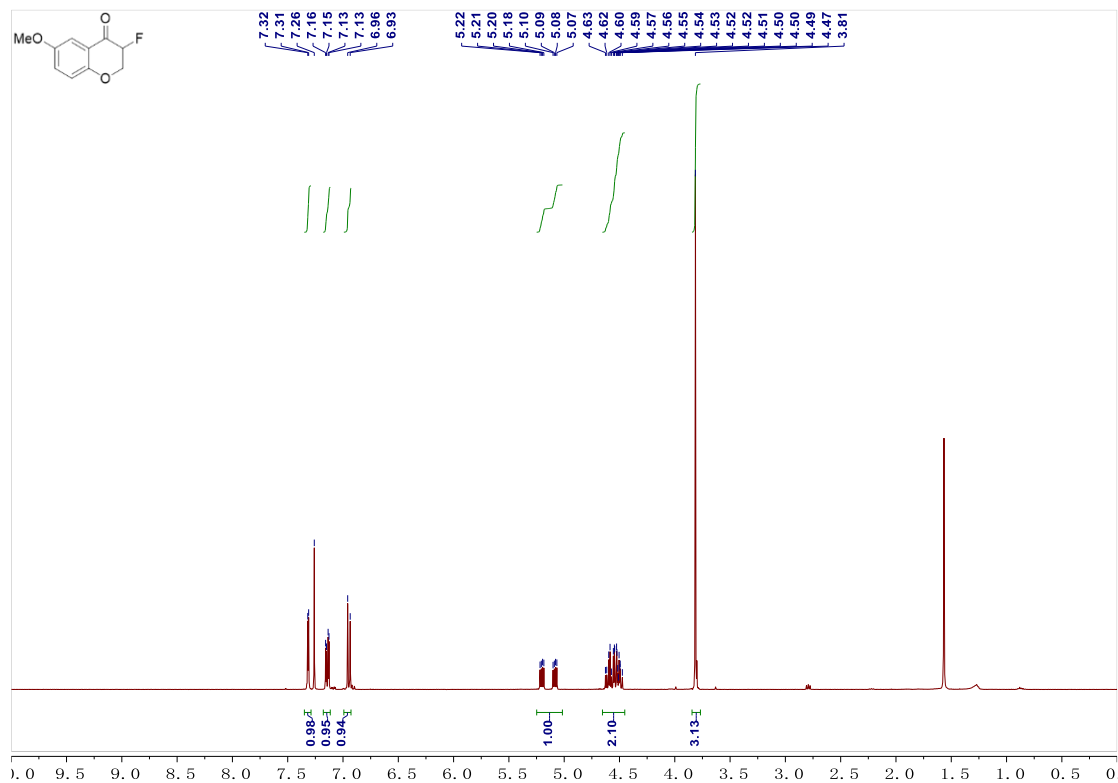

<sup>19</sup>F NMR (400 MHz, CDCl<sub>3</sub>) of compound **1j**

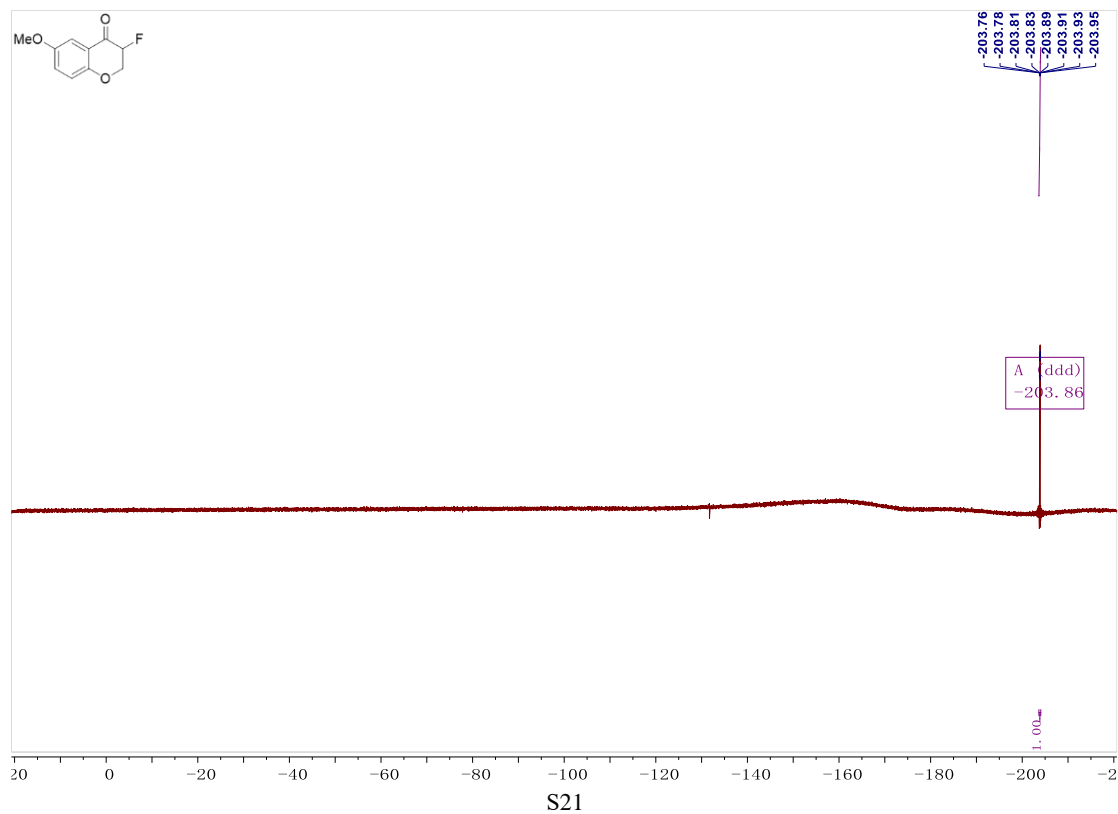

<sup>1</sup>H NMR (400 MHz, CDCl<sub>3</sub>) of compound **1k**

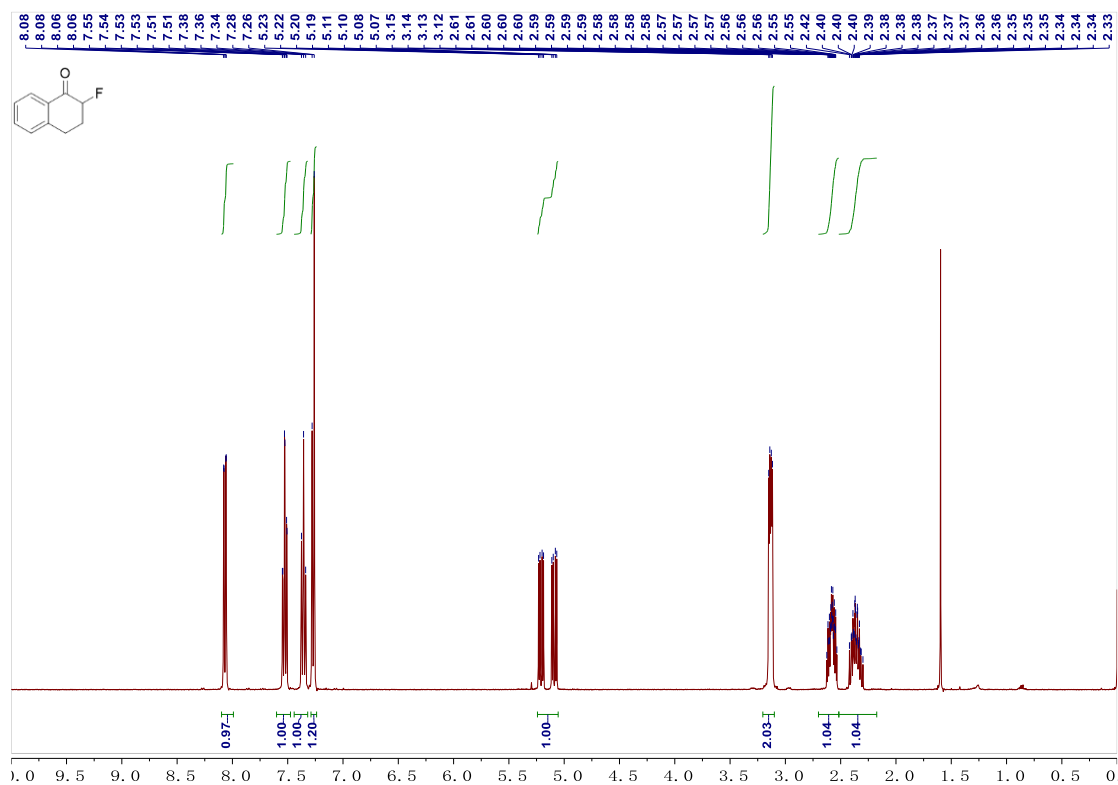

<sup>19</sup>F NMR (400 MHz, CDCl<sub>3</sub>) of compound **1k**

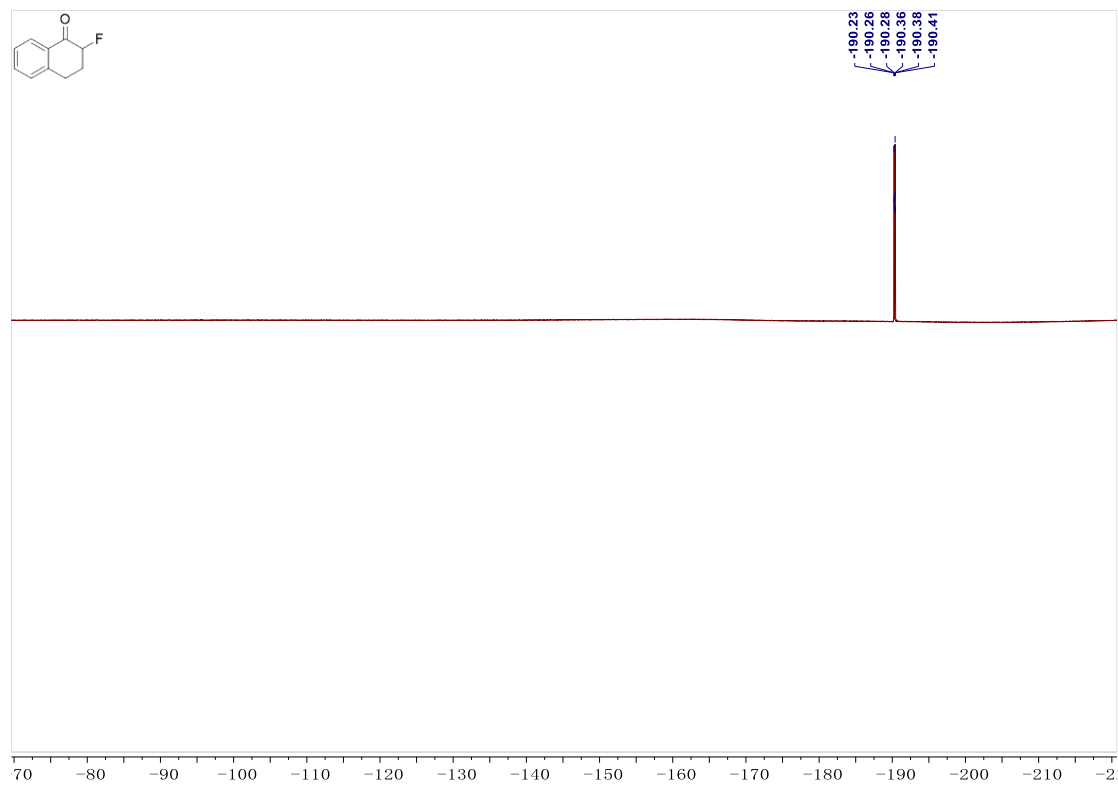

<sup>1</sup>H NMR (400 MHz, CDCl<sub>3</sub>) of compound **11**

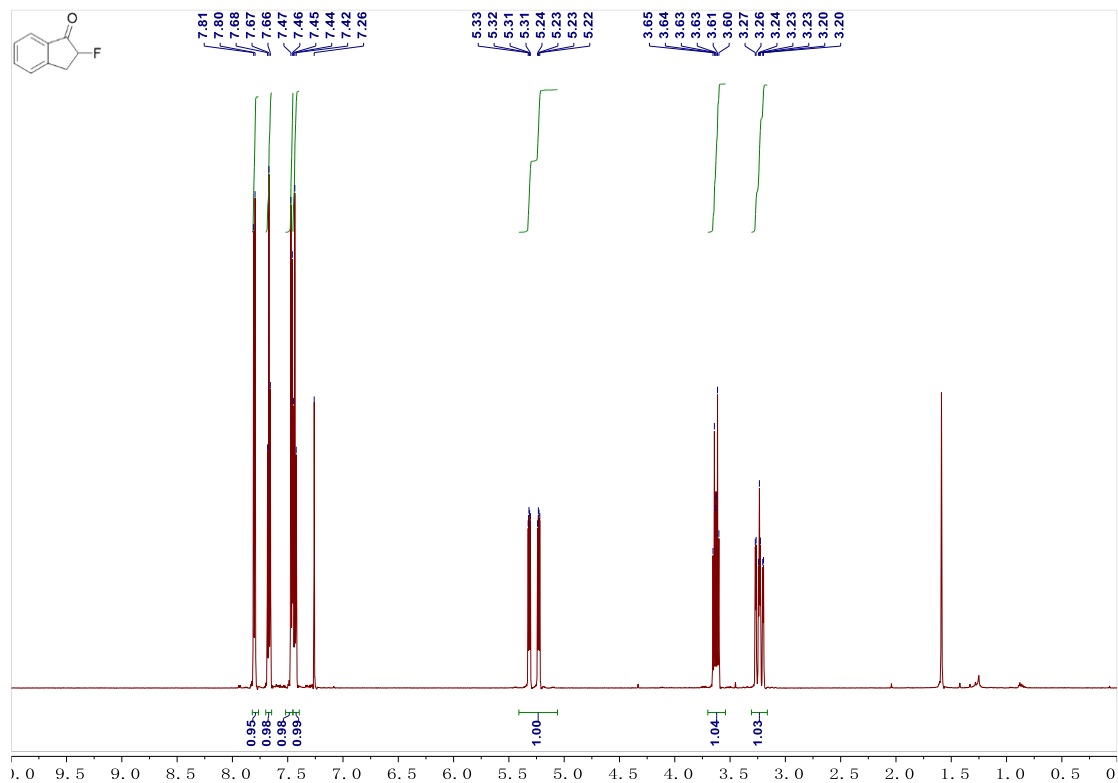

<sup>19</sup>F NMR (400 MHz, CDCl<sub>3</sub>) of compound **11**

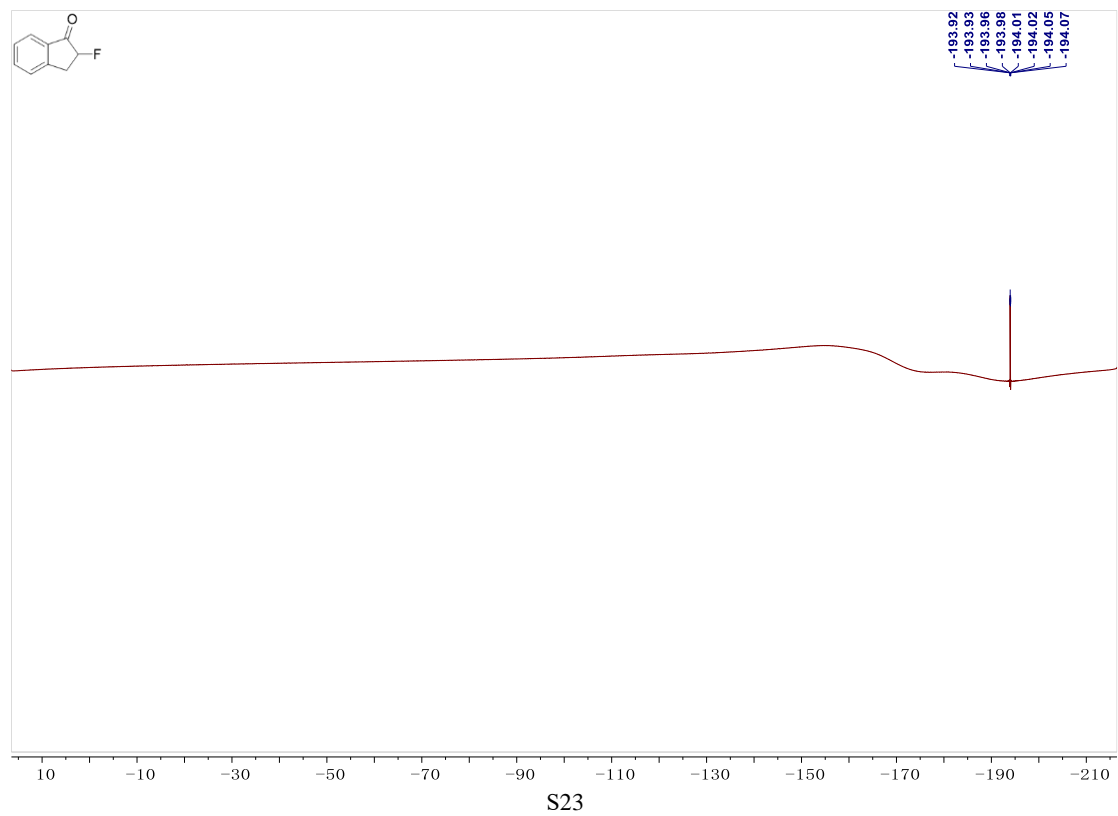

<sup>1</sup>H NMR (400 MHz, CDCl<sub>3</sub>) of compound **1m**

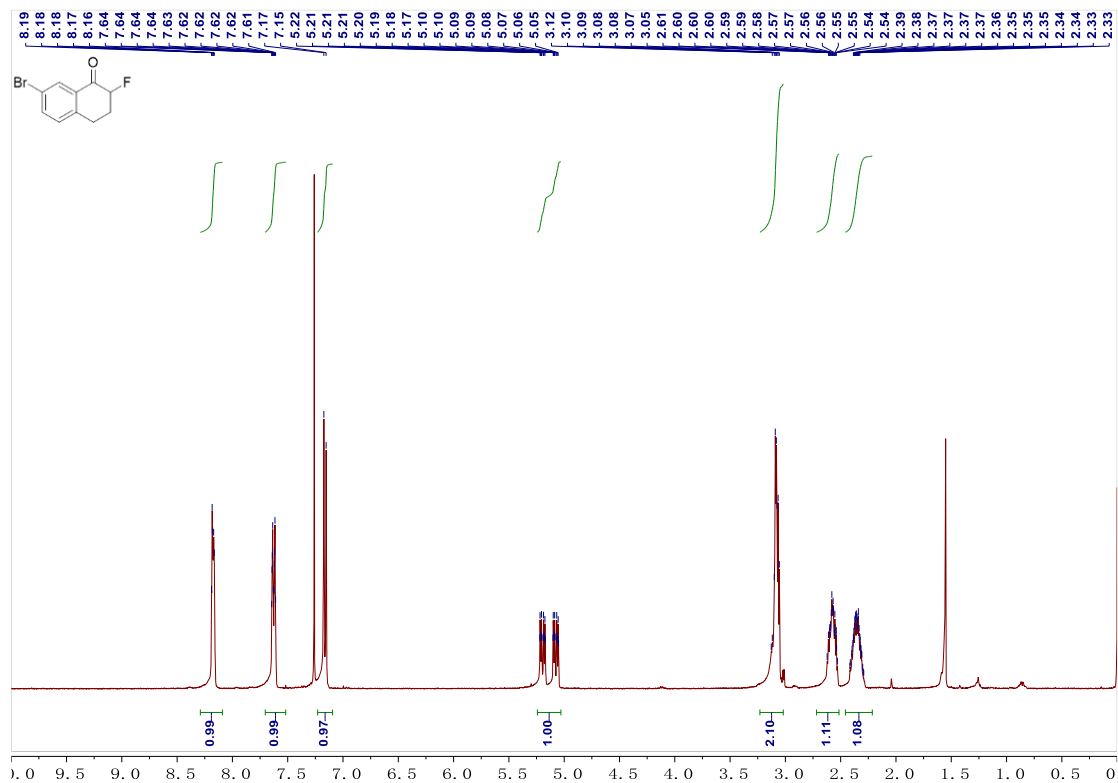

<sup>19</sup>F NMR (400 MHz, CDCl<sub>3</sub>) of compound **1m**

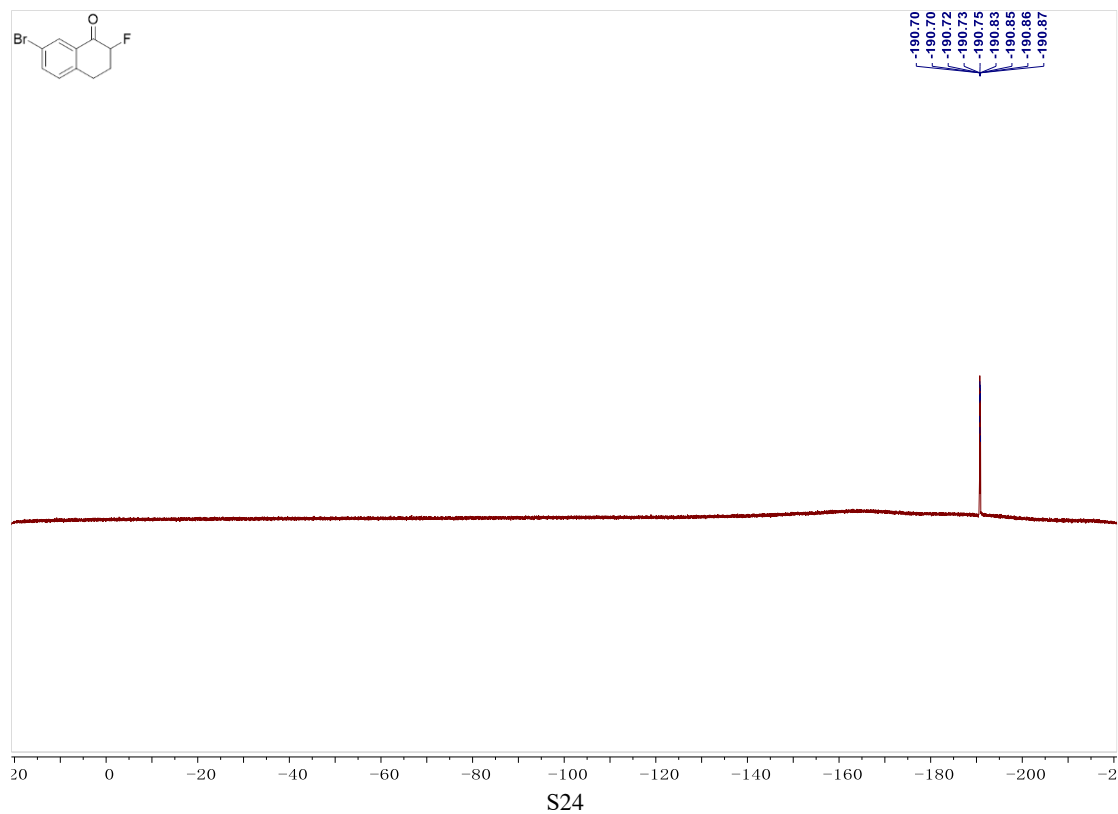



<sup>1</sup>H NMR (400 MHz, CDCl<sub>3</sub>) of compound **1n**

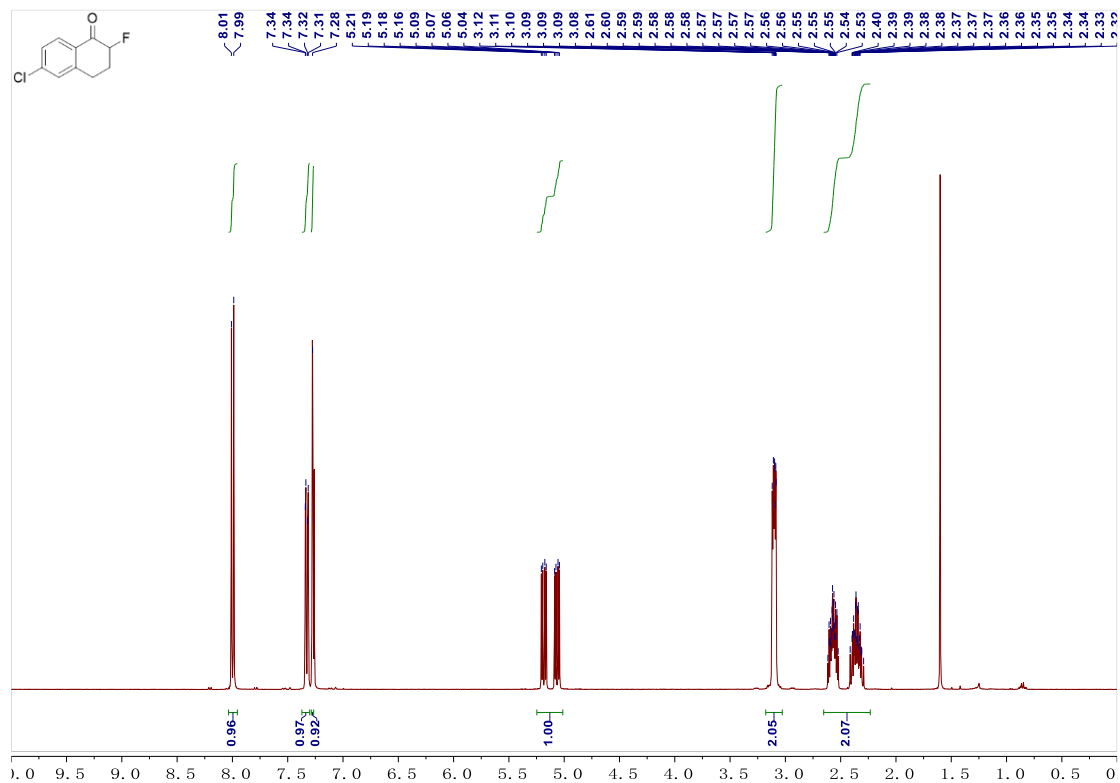

<sup>19</sup>F NMR (400 MHz, CDCl<sub>3</sub>) of compound **1n**

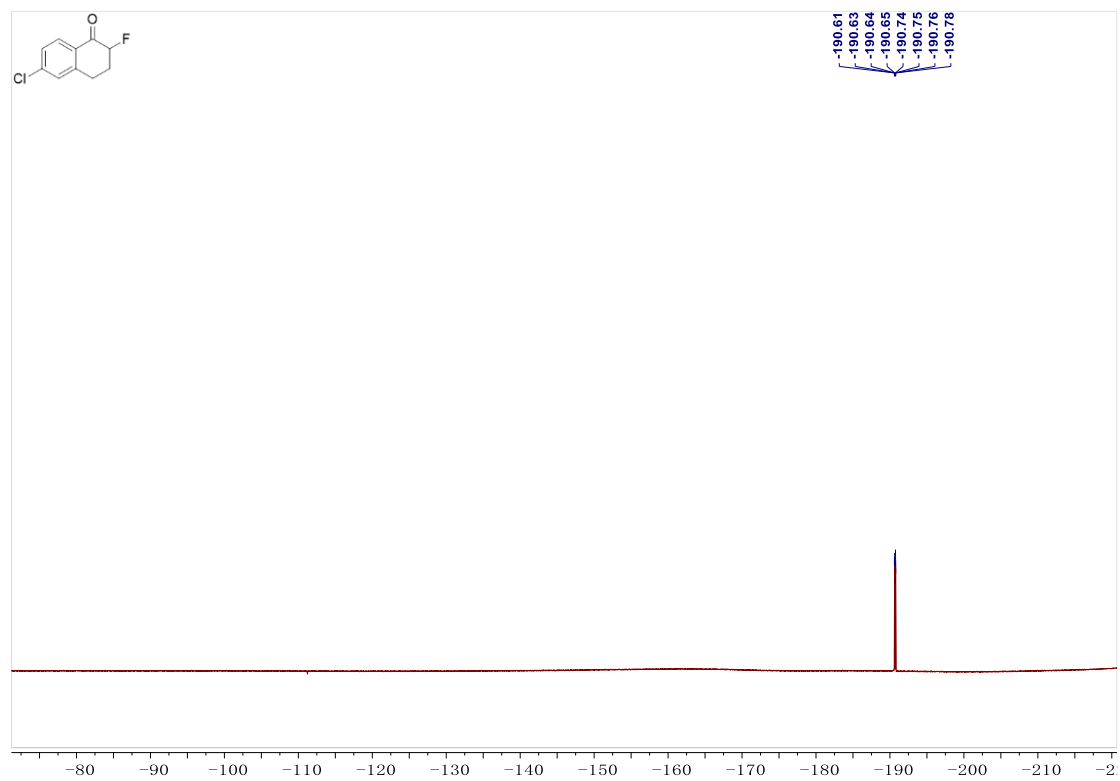

$^1\text{H}$  NMR (400 MHz,  $\text{CDCl}_3$ ) of compound **1o**

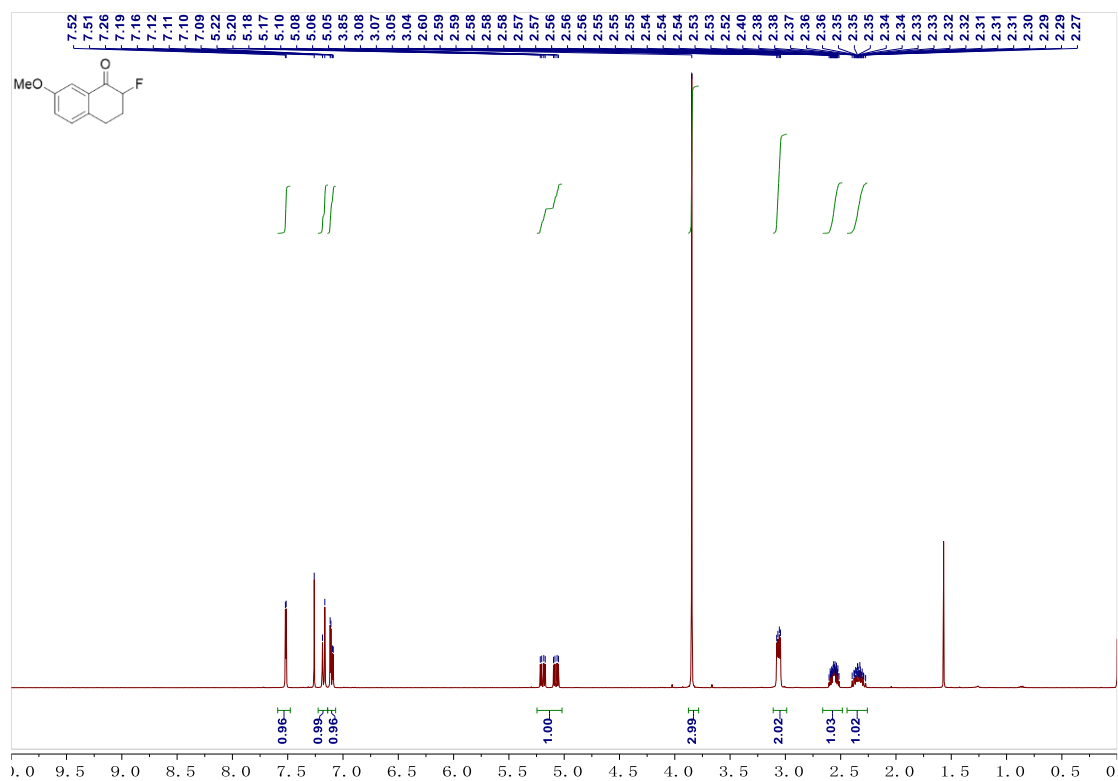

$^{19}\text{F}$  NMR (400 MHz,  $\text{CDCl}_3$ ) of compound **1o**

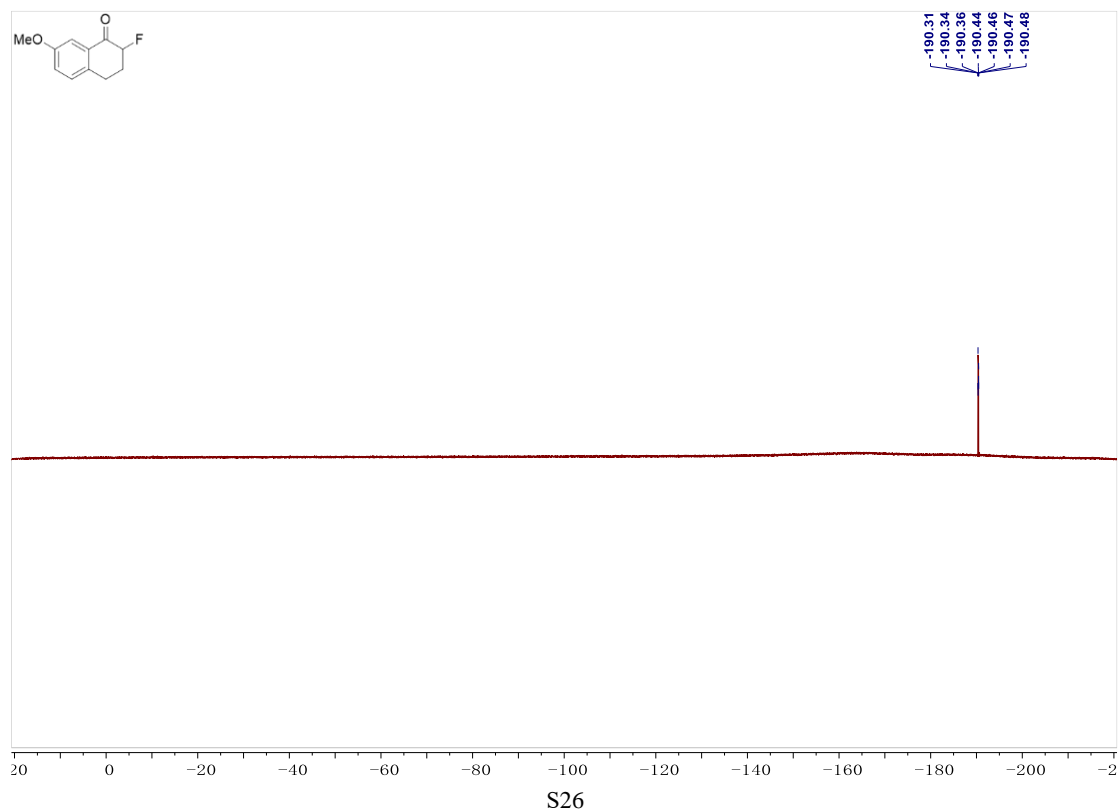

<sup>1</sup>H NMR (400 MHz, CDCl<sub>3</sub>) of compound **1p**

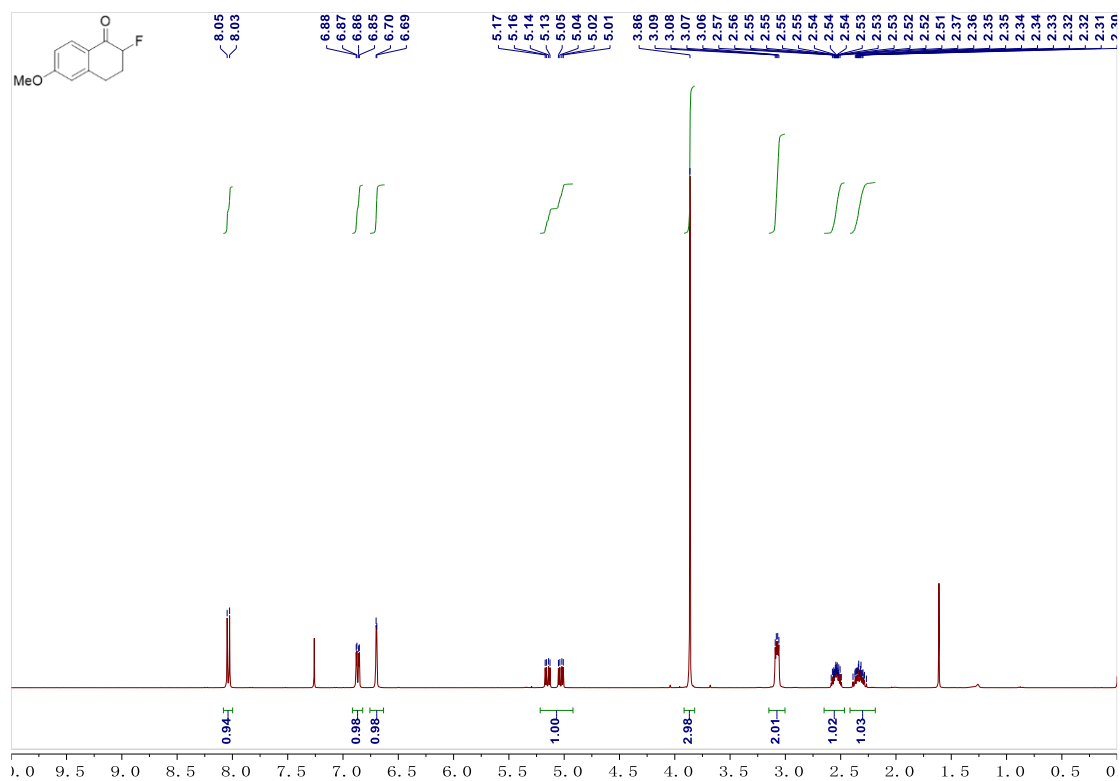

<sup>19</sup>F NMR (400 MHz, CDCl<sub>3</sub>) of compound **1p**

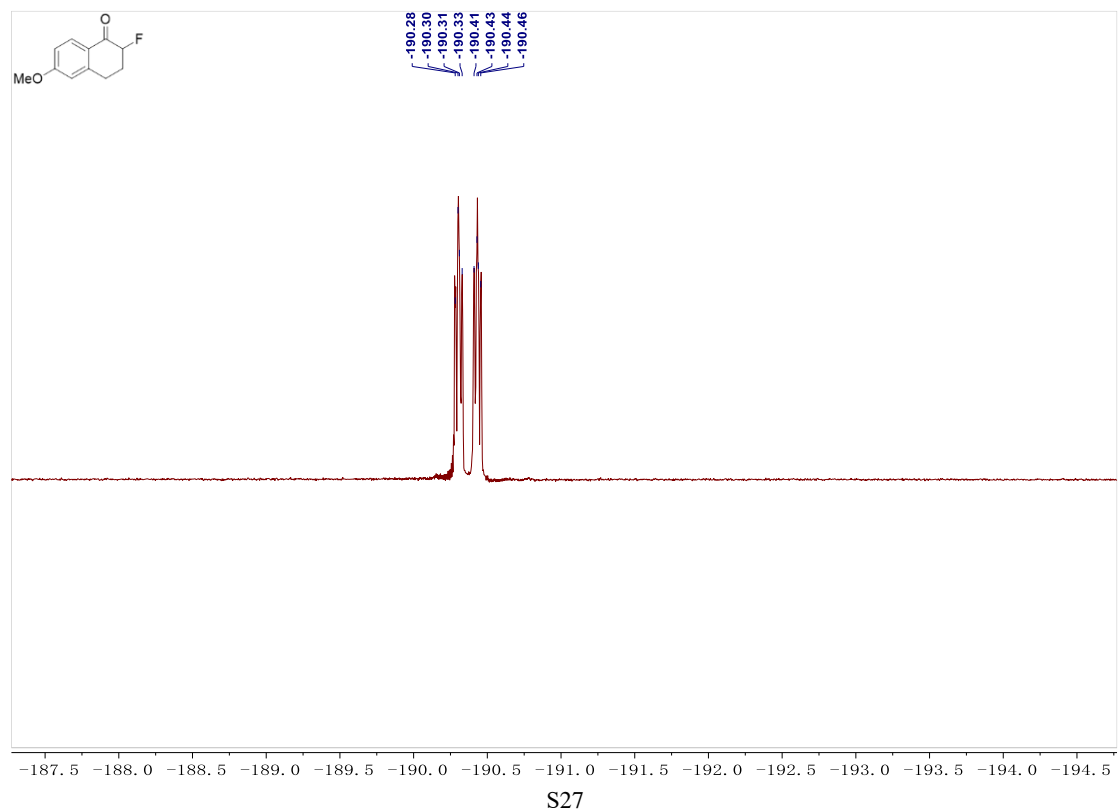

<sup>1</sup>H NMR (400 MHz, CDCl<sub>3</sub>) of compound **1q**

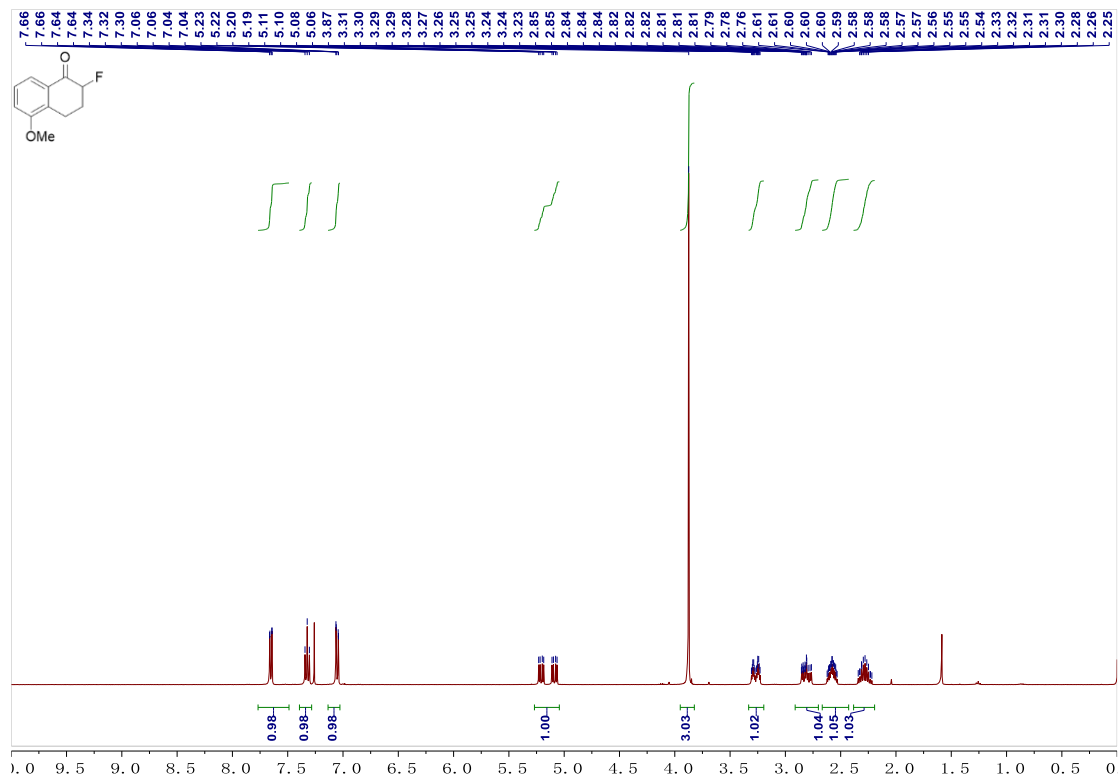

<sup>19</sup>F NMR (400 MHz, CDCl<sub>3</sub>) of compound **1q**

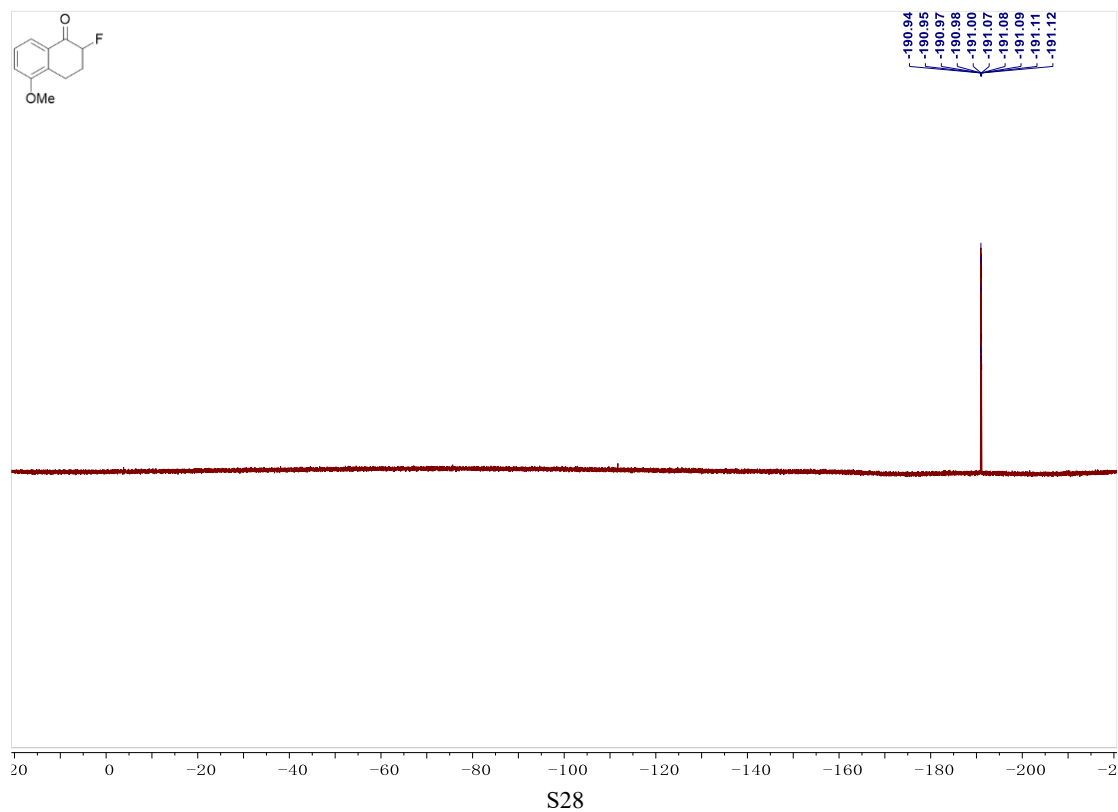

$^1\text{H}$  NMR (400 MHz,  $\text{CDCl}_3$ ) of compound **1r**

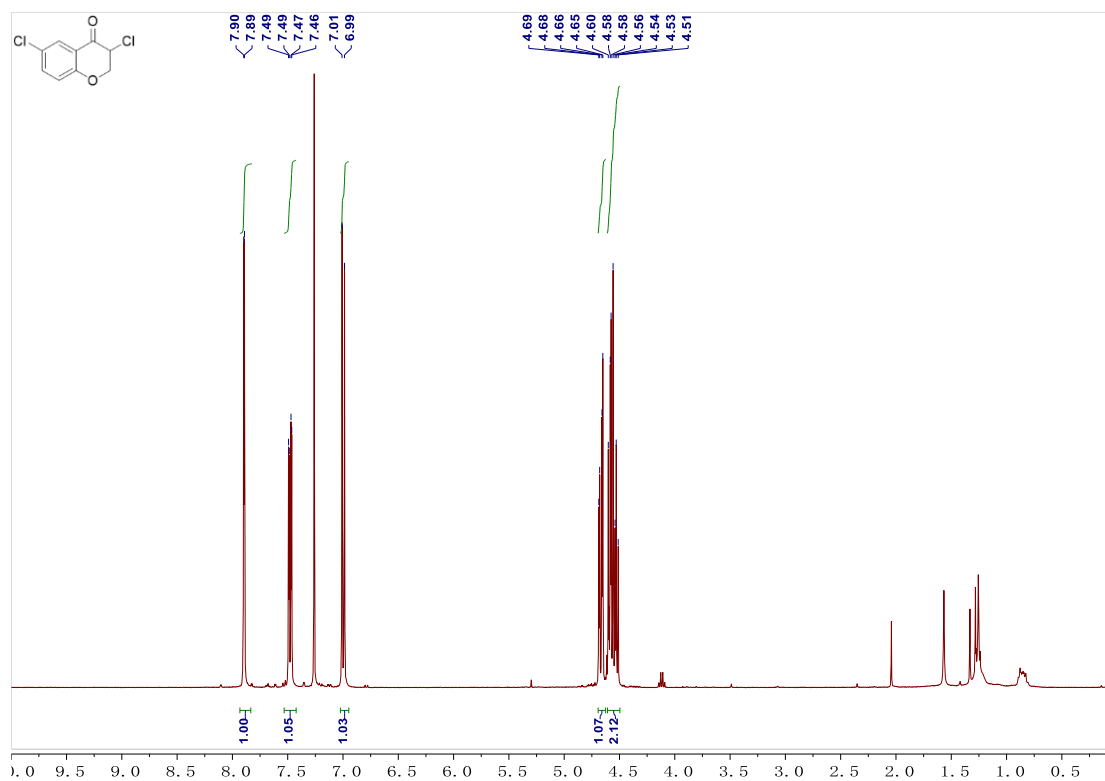

$^{13}\text{C}$  NMR (100 MHz,  $\text{CDCl}_3$ ) of compound **1r**

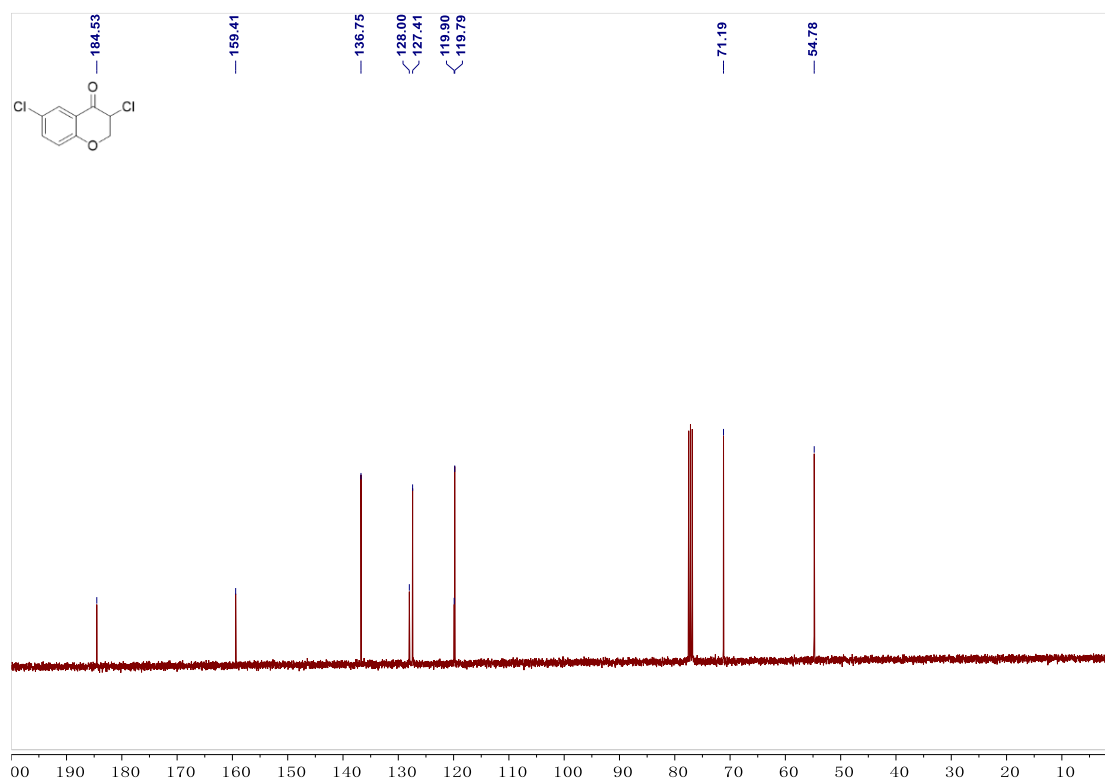

<sup>1</sup>H NMR (400 MHz, CDCl<sub>3</sub>) of compound **1s**

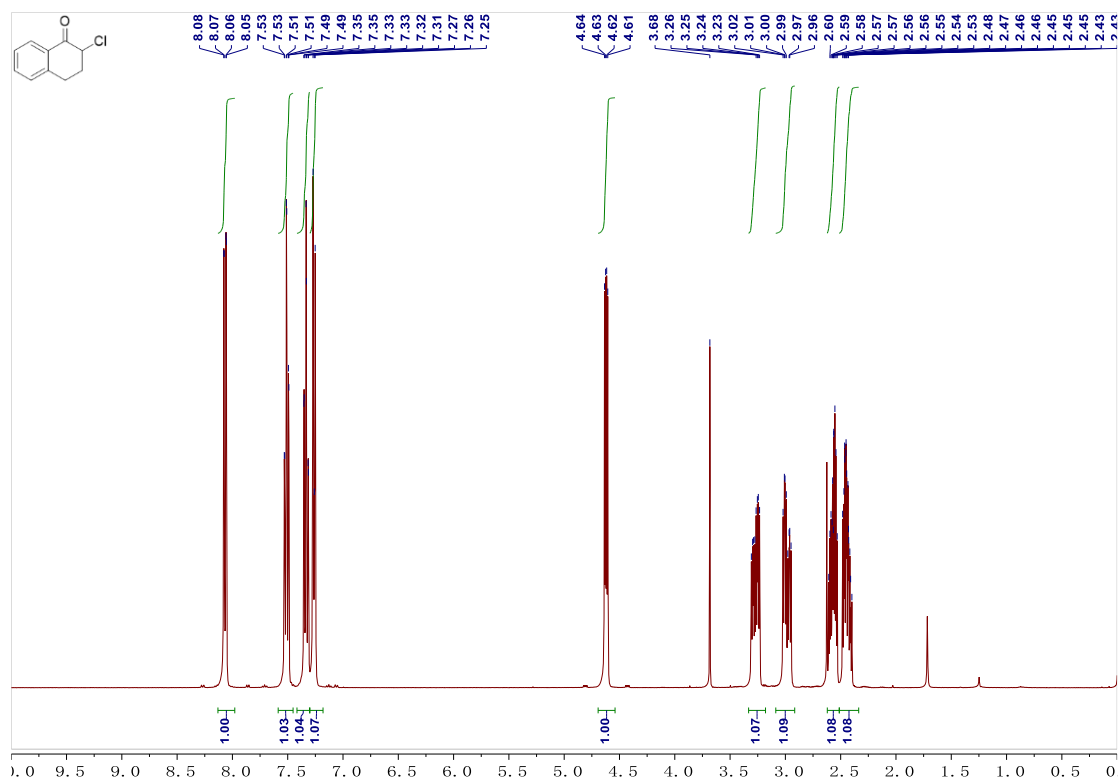

<sup>1</sup>H NMR (400 MHz, CDCl<sub>3</sub>) of compound **1t**

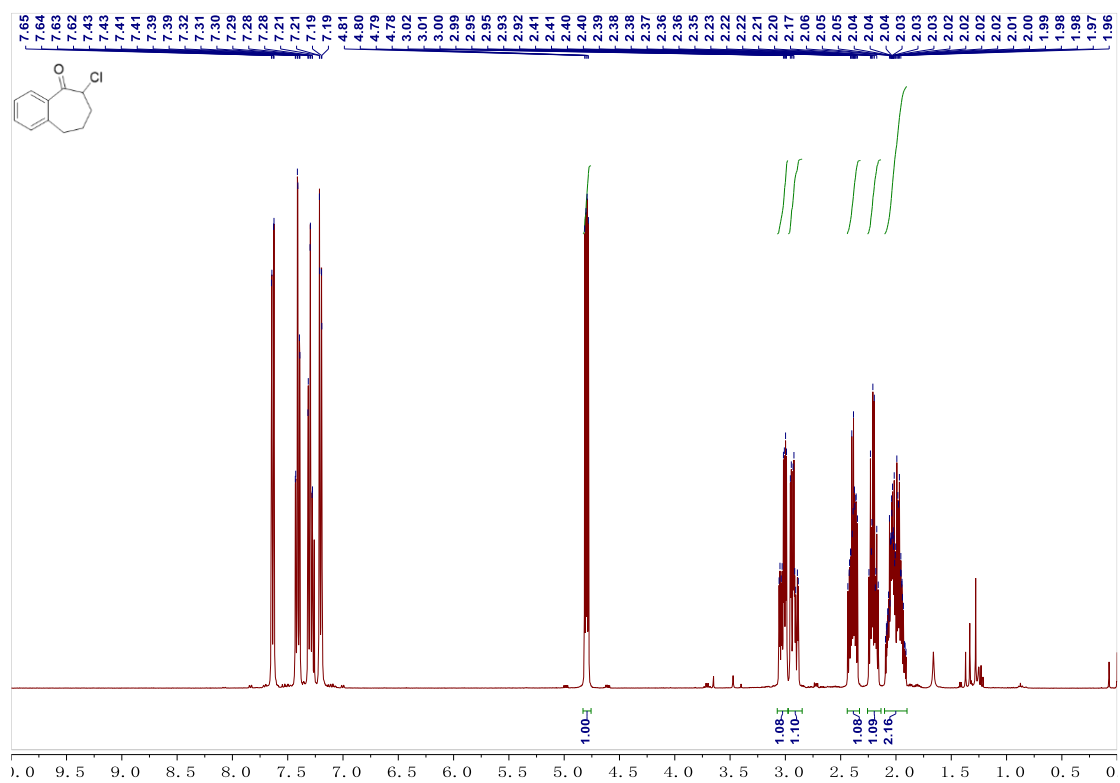



<sup>1</sup>H NMR (400 MHz, CDCl<sub>3</sub>) of compound **1v**

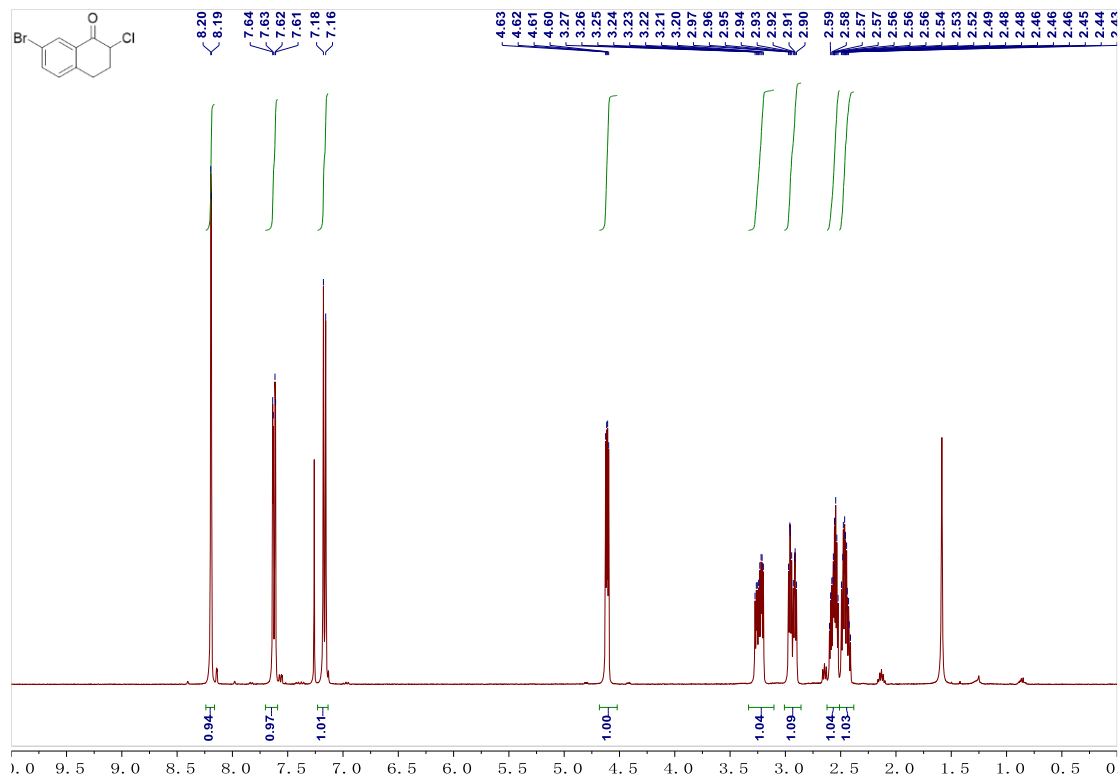

<sup>1</sup>H NMR (400 MHz, CDCl<sub>3</sub>) of compound **1w**

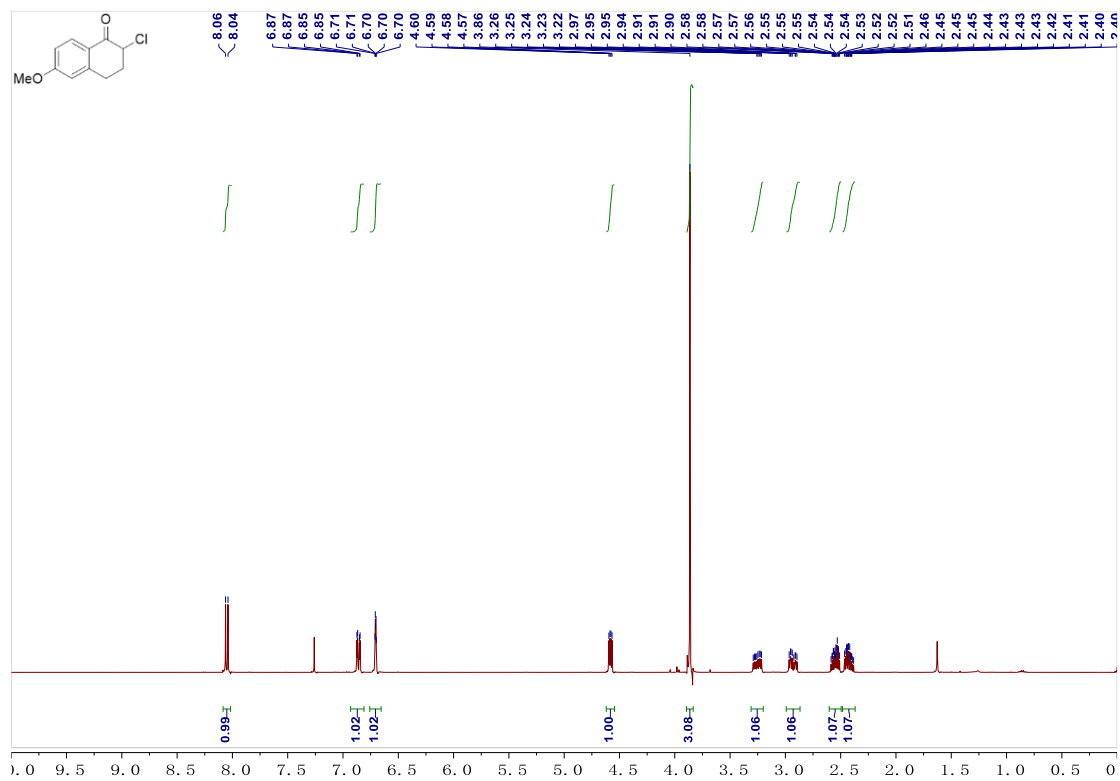



<sup>1</sup>H NMR (400 MHz, CDCl<sub>3</sub>) of compound **1x**

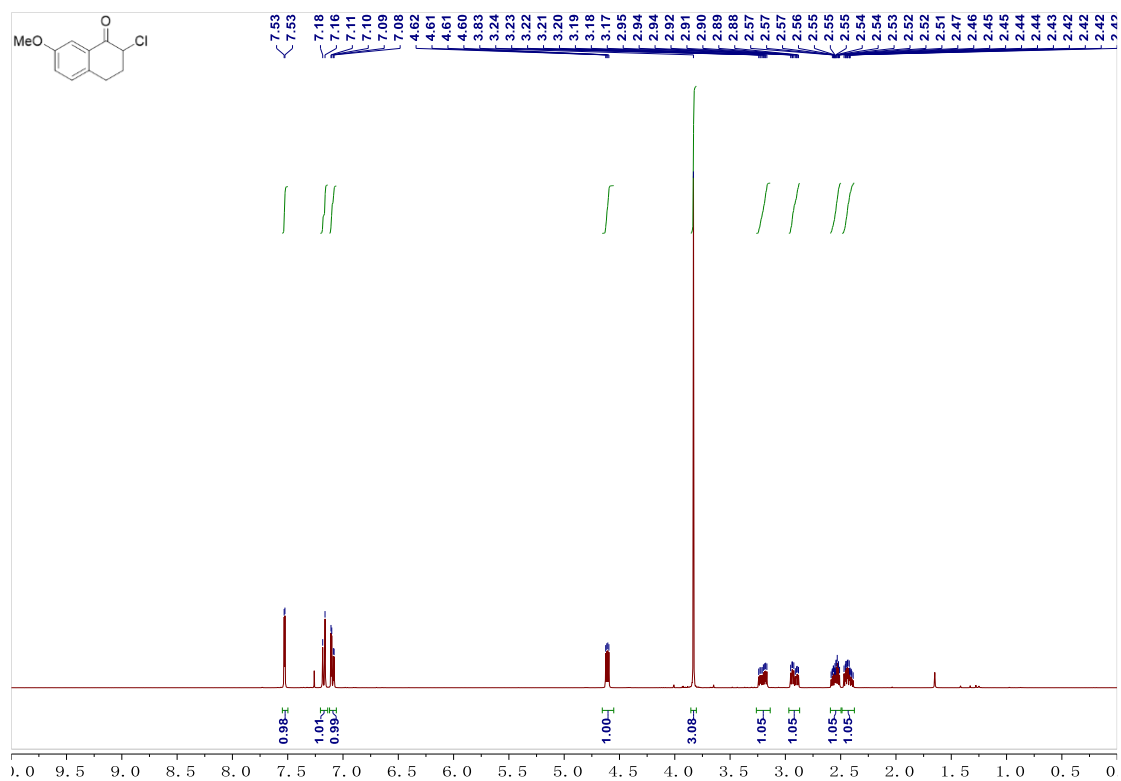

## 4. General procedure for Asymmetric hydrogenation of cyclic $\alpha$ -halogenated ketones

Prepared the [Ir-f-phamidol] solution: in a 5 ml vial was charged with [Ir-f phamidol] complexes 19.6 mg and anhydrous toluene 2 ml to make a 0.0125M [Ir-f- phamidol] solution.

General procedure for S/C = 1000: In an argon-filled glove box, the prepared [Ir-f-phamidol] solution (32  $\mu$ L), KOH (2.2 mg, 0.04 mmol) and ketones (0.4 mmol) in were charged in a 5 ml vial in 1.0 mL anhydrous toluene. The vial was transferred to an autoclave, which was then pressurized with 5 atm of H<sub>2</sub> and stirred at room temperature for 16 h. The hydrogen gas was released slowly in a well-ventilated hood and the crude reaction mixture was evaporated under reduced pressure. The dr values were measured by <sup>1</sup>H NMR from the crude product, after that, purified by flash column chromatography on silica gel using petroleum ether/ethyl acetate (80:20, v/v) afforded the reduced product, then the product was analyzed by chiral HPLC for ee.

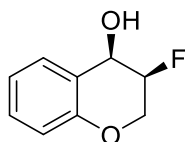

(3*S*,4*R*)-3-Fluorochroman-4-ol (**2a**):<sup>[31]</sup> Colourless crystal, 67 mg, 99% yield, dr (*cis/trans*) > 20:1, ee<sub>cis</sub> = 99%, [ $\alpha$ ]<sub>D</sub><sup>23</sup> = 42.7 (c 1.0, CHCl<sub>3</sub>). <sup>1</sup>H NMR (400 MHz, CDCl<sub>3</sub>):  $\delta$  7.47 (d, *J* = 7.6 Hz, 1H), 7.23 (dddd, *J* = 8.0, 7.3, 1.7, 0.6 Hz, 1H), 6.99 (td, *J* = 7.5, 1.2 Hz, 1H), 6.85 (dd, *J* = 8.2, 0.9 Hz, 1H), 5.00 (dddd, *J* = 48.3, 5.6, 3.6, 2.0 Hz, 1H), 4.90 (dd, *J* = 20.0, 4.0 Hz, 1H), 4.48 (ddd, *J* = 12.2, 7.8, 5.6 Hz, 1H), 4.21 (dddd, *J* = 28.5, 12.2, 2.0, 1.2 Hz, 1H), 2.37 (d, *J* = 7.8 Hz, 1H). <sup>19</sup>F NMR (376 MHz, CDCl<sub>3</sub>):  $\delta$  -209.40 (dddd, *J* = 48.1, 28.4, 20.0, 7.9 Hz).

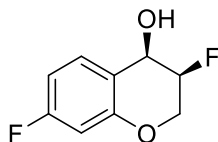

(3*S*,4*R*)-3,7-Difluorochroman-4-ol (**2b**):<sup>[3]</sup> Colourless crystal, 72 mg, 97% yield, dr (*cis/trans*) > 20:1,  $ee_{cis}$  = 96%,  $[\alpha]_D^{23}$  = 46.8 (c 1.0, CHCl<sub>3</sub>). <sup>1</sup>H NMR (400 MHz, CDCl<sub>3</sub>):  $\delta$  7.42 (dd,  $J$  = 8.6, 6.4 Hz, 1H), 6.71 (td,  $J$  = 8.4, 2.5 Hz, 1H), 6.57 (dd,  $J$  = 10.0, 2.5 Hz, 1H), 4.99 (dddd,  $J$  = 48.1, 5.6, 3.6, 2.0 Hz, 1H), 4.86 (ddd,  $J$  = 19.6, 8.9, 3.5 Hz, 1H), 4.48 (ddd,  $J$  = 12.3, 7.9, 5.6 Hz, 1H), 4.22 (ddt,  $J$  = 28.2, 12.2, 1.6 Hz, 1H), 2.34 (dd,  $J$  = 8.9, 2.3 Hz, 1H). <sup>19</sup>F NMR (376 MHz, CDCl<sub>3</sub>):  $\delta$  -111.52 (q,  $J$  = 8.2 Hz), -209.63 (dddd,  $J$  = 48.0, 28.1, 19.5, 8.1 Hz).

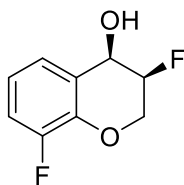

(3*S*,4*R*)-3,8-Difluorochroman-4-ol (**2c**): Colourless crystal, 73 mg, 98% yield, dr (*cis/trans*) > 20:1,  $ee_{cis}$  = 93%,  $[\alpha]_D^{23}$  = 33.6 (c 1.0, CHCl<sub>3</sub>). <sup>1</sup>H NMR (400 MHz, CDCl<sub>3</sub>):  $\delta$  7.25 (d,  $J$  = 8.4 Hz, 1H), 7.03 (ddd,  $J$  = 10.5, 8.2, 1.6 Hz, 1H), 6.91 (td,  $J$  = 8.0, 4.7 Hz, 1H), 5.02 (dddd,  $J$  = 48.0, 5.4, 3.6, 1.9 Hz, 1H), 4.90 (dd,  $J$  = 20.6, 3.6 Hz, 1H), 4.57 (ddd,  $J$  = 12.4, 8.3, 5.2 Hz, 1H), 4.28 (ddt,  $J$  = 29.9, 12.5, 1.5 Hz, 1H), 2.45 (br, 1H). <sup>13</sup>C NMR (100 MHz, CDCl<sub>3</sub>):  $\delta$  150.9 (d,  $J$  = 246.1 Hz), 141.8 (d,  $J$  = 11.6 Hz), 124.3, 123.7 (d,  $J$  = 3.6 Hz), 121.2 (d,  $J$  = 7.1 Hz), 116.4 (d,  $J$  = 17.6 Hz), 85.9 (d,  $J$  = 178.2 Hz), 65.1 (d,  $J$  = 22.3 Hz), 64.9 (dd,  $J$  = 19.7 Hz). <sup>19</sup>F NMR (376 MHz, CDCl<sub>3</sub>):  $\delta$  -136.26 (dd,  $J$  = 10.7, 4.5 Hz), -209.43 (dddd,  $J$  = 48.7, 29.5, 20.8, 8.3 Hz). HRMS (ESI/ion trap):  $m/z$  [M + H - H<sub>2</sub>O]<sup>+</sup> calcd for C<sub>9</sub>H<sub>7</sub>F<sub>2</sub>O 169.0465, found 169.0456.

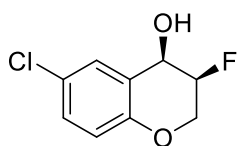

(3*S*,4*R*)-6-Chloro-3-fluorochroman-4-ol (**2d**): Colourless crystal, 80 mg, 99% yield, dr (*cis/trans*) > 20:1,  $ee_{cis} = 96\%$ ,  $[\alpha]_D^{23} = 58.3$  (c 1.0, CHCl<sub>3</sub>). <sup>1</sup>H NMR (400 MHz, CDCl<sub>3</sub>):  $\delta$  7.46 (s, 1H), 7.17 (dd,  $J = 8.6, 2.4$  Hz, 1H), 6.78 (d,  $J = 8.6$  Hz, 1H), 4.99 (d,  $J = 48.3$  Hz, 1H), 4.84 (dd,  $J = 21.4, 3.5$  Hz, 1H), 4.49 (ddd,  $J = 13.1, 8.6, 4.8$  Hz, 1H), 4.20 (dd,  $J = 31.6, 12.6$  Hz, 1H), 2.40 (br, 1H). <sup>13</sup>C NMR (100 MHz, CDCl<sub>3</sub>):  $\delta$  152.0, 129.9, 128.4, 126.5, 123.5, 117.9, 85.8 (d,  $J = 178.1$  Hz), 65.1 (d,  $J = 21.7$  Hz), 65.0 (d,  $J = 19.8$  Hz). <sup>19</sup>F NMR (376 MHz, CDCl<sub>3</sub>):  $\delta$  -209.50 (dddd,  $J = 48.5, 30.7, 21.3, 8.5$  Hz). HRMS (ESI/ion trap):  $m/z$  [M + H - H<sub>2</sub>O]<sup>+</sup> calcd for C<sub>9</sub>H<sub>7</sub>ClFO 185.0169, found 185.0161.

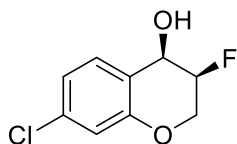

(3*S*,4*R*)-7-Chloro-3-fluorochroman-4-ol (**2e**): Colourless crystal, 80 mg, 99% yield, dr (*cis/trans*) > 20:1,  $ee_{cis} = 93\%$ ,  $[\alpha]_D^{23} = 45.9$  (c 1.0, CHCl<sub>3</sub>). <sup>1</sup>H NMR (400 MHz, CDCl<sub>3</sub>):  $\delta$  7.40 (d,  $J = 8.3$  Hz, 1H), 6.97 (dd,  $J = 8.3, 2.1$  Hz, 1H), 6.87 (d,  $J = 2.1$  Hz, 1H), 4.99 (dddd,  $J = 48.2, 5.4, 3.6, 1.9$  Hz, 1H), 4.85 (d,  $J = 20.3$  Hz, 1H), 4.49 (ddd,  $J = 12.4, 8.3, 5.3$  Hz, 1H), 4.21 (ddt,  $J = 29.8, 12.4, 1.5$  Hz, 1H), 2.34 (br, 1H). <sup>13</sup>C NMR (100 MHz, CDCl<sub>3</sub>):  $\delta$  154.0, 135.2, 129.8, 121.9, 120.4, 116.6, 86.0 (d,  $J = 178.6$  Hz), 65.0 (d,  $J = 22.3$  Hz), 64.9 (d,  $J = 19.8$  Hz). <sup>19</sup>F NMR (376 MHz, CDCl<sub>3</sub>):  $\delta$  -209.56 (dddd,  $J = 56.4, 30.1, 21.0, 7.5$  Hz). HRMS (ESI/ion trap):  $m/z$  [M + H - H<sub>2</sub>O]<sup>+</sup> calcd for C<sub>9</sub>H<sub>7</sub>ClFO 185.0169, found 185.0161.

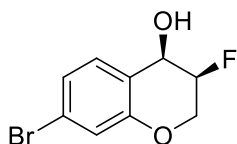

(3*S*,4*R*)-7-Bromo-3-fluorochroman-4-ol (**2f**):<sup>[31]</sup> Colourless crystal, 96 mg, 98% yield, dr (*cis/trans*) > 20:1,  $ee_{cis} = 98\%$ ,  $[\alpha]_D^{23} = 38.6$  (c 1.0, CHCl<sub>3</sub>). <sup>1</sup>H NMR (400 MHz, CDCl<sub>3</sub>):  $\delta$  7.33 (d,  $J = 8.2$  Hz, 1H), 7.11 (dd,  $J = 8.2, 1.6$  Hz, 1H), 7.03 (d,  $J = 1.6$  Hz, 1H), 4.99 (d,  $J = 48.4$  Hz, 1H), 4.83 (d,  $J = 20.5$  Hz, 1H), 4.48 (ddd,  $J = 13.1, 8.3, 5.1$

Hz, 1H), 4.21 (dd,  $J = 30.1, 12.4$  Hz, 1H), 2.41 (br, 1H).  $^{19}\text{F}$  NMR (376 MHz,  $\text{CDCl}_3$ ):  $\delta$  -209.50 (dddd,  $J = 49.8, 30.0, 20.7, 8.3$  Hz).

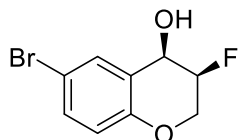

(3*S*,4*R*)-6-Bromo-3-fluorochroman-4-ol (**2g**): Colourless crystal, 96 mg, 98% yield, dr (*cis/trans*) > 20:1,  $ee_{cis} = 99\%$ ,  $[\alpha]_D^{23} = 27.3$  (c 1.0,  $\text{CHCl}_3$ ).  $^1\text{H}$  NMR (400 MHz,  $\text{CDCl}_3$ ):  $\delta$  7.61 (d,  $J = 2.5$  Hz, 1H), 7.30 (dd,  $J = 8.7, 2.4$  Hz, 1H), 6.73 (d,  $J = 8.7$  Hz, 1H), 4.99 (d,  $J = 48.3$  Hz, 1H), 4.85 (d,  $J = 21.1$  Hz, 1H), 4.49 (ddd,  $J = 13.1, 8.6, 4.8$  Hz, 1H), 4.20 (dd,  $J = 31.6, 12.6$  Hz, 1H), 2.43 (br, 1H).  $^{13}\text{C}$  NMR (100 MHz,  $\text{CDCl}_3$ ):  $\delta$  152.5, 132.8, 131.3, 124.0, 118.3, 113.7, 85.8 (d,  $J = 178.5$  Hz), 65.1 (d,  $J = 21.8$  Hz), 65.0 (d,  $J = 19.8$  Hz).  $^{19}\text{F}$  NMR (376 MHz,  $\text{CDCl}_3$ ):  $\delta$  -209.61 (dddd,  $J = 47.6, 30.6, 21.4, 8.5$  Hz). HRMS (ESI/ion trap):  $m/z$   $[\text{M} + \text{H} - \text{H}_2\text{O}]^+$  calcd for  $\text{C}_9\text{H}_7\text{BrFO}$  228.9664, found 228.9654.

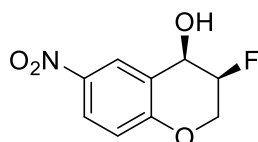

(3*S*,4*R*)-3-Fluoro-6-nitrochroman-4-ol (**2h**):<sup>[3]</sup> Colourless crystal, 79 mg, 93% yield, dr (*cis/trans*) > 20:1,  $ee_{cis} = \%$ ,  $[\alpha]_D^{23} = 195.5$  (c 1.0,  $\text{CHCl}_3$ ).  $^1\text{H}$  NMR (400 MHz,  $\text{CDCl}_3$ ):  $\delta$  8.46 (d,  $J = 2.7$  Hz, 1H), 8.10 (dd,  $J = 9.1, 2.7$  Hz, 1H), 6.93 (d,  $J = 9.1$  Hz, 1H), 5.09 (dt,  $J = 48.3, 3.9$  Hz, 1H), 4.93 (dd,  $J = 23.0, 6.9$  Hz, 1H), 4.63 (ddd,  $J = 13.5, 9.5, 4.3$  Hz, 1H), 4.34 (dd,  $J = 33.7, 13.0$  Hz, 1H), 2.62 (d,  $J = 9.2$  Hz, 1H).  $^{19}\text{F}$  NMR (376 MHz,  $\text{CDCl}_3$ ):  $\delta$  -209.30 (dddd,  $J = 48.3, 33.1, 23.1, 9.6$  Hz).

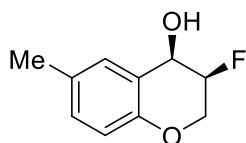

(3*S*,4*R*)-3-Fluoro-6-methylchroman-4-ol (**2i**):<sup>[31]</sup> Colourless crystal, 71 mg, 98% yield, dr (*cis/trans*) > 20:1, ee<sub>cis</sub> = 94%, [α]<sub>D</sub><sup>23</sup> = 31.0 (c 1.0, CHCl<sub>3</sub>). <sup>1</sup>H NMR (400 MHz, CDCl<sub>3</sub>): δ 7.26 (br, 1H), 7.03 (dd, *J* = 8.4, 2.2 Hz, 1H), 6.75 (d, *J* = 8.3 Hz, 1H), 4.99 (dddd, *J* = 48.2, 5.8, 3.6, 2.1 Hz, 1H), 4.87 (d, *J* = 18.8, 1H), 4.44 (ddd, *J* = 12.1, 7.6, 5.8 Hz, 1H), 4.16 (ddt, *J* = 27.7, 12.1, 1.5 Hz, 1H), 2.32 (br, 1H), 2.29 (s, 3H). <sup>19</sup>F NMR (376 MHz, CDCl<sub>3</sub>): δ -209.72 (m).

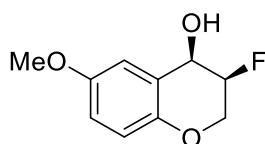

(3*S*,4*R*)-3-Fluoro-6-methoxychroman-4-ol (**2j**):<sup>[31]</sup> Colourless crystal, 78 mg, 99% yield, dr (*cis/trans*) > 20:1, ee<sub>cis</sub> = 91%, [α]<sub>D</sub><sup>23</sup> = 44.3 (c 1.0, CHCl<sub>3</sub>). <sup>1</sup>H NMR (400 MHz, CDCl<sub>3</sub>): δ 7.01 (d, *J* = 2.3 Hz, 1H), 6.86-6.73 (m, 2H), 4.99 (dddd, *J* = 48.3, 5.3, 3.7, 1.8 Hz, 1H), 4.87 (dd, *J* = 20.8, 3.7 Hz, 1H), 4.45 (ddd, *J* = 12.4, 8.1, 5.2 Hz, 1H), 4.16 (ddt, *J* = 30.3, 12.4, 1.5 Hz, 1H), 3.77 (s, 3H), 2.38 (br, 1H). <sup>19</sup>F NMR (376 MHz, CDCl<sub>3</sub>): δ -209.44 (dddd, *J* = 48.7, 29.7, 20.8, 8.3 Hz).

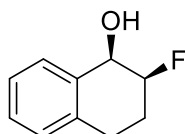

(1*R*,2*S*)-2-Fluoro-1,2,3,4-tetrahydronaphthalen-1-ol (**2k**):<sup>[81]</sup> Colourless crystal, 66 mg, 99% yield, dr (*cis/trans*) > 20:1, ee<sub>cis</sub> = 99%, [α]<sub>D</sub><sup>23</sup> = 21.2 (c 1.0, CHCl<sub>3</sub>). <sup>1</sup>H NMR (400 MHz, CDCl<sub>3</sub>): δ 7.52 (dd, *J* = 5.5, 3.7 Hz, 1H), 7.30-.21 (m, 2H), 7.17-7.09 (m, 1H), 5.00 (ddt, *J* = 49.7, 8.7, 3.0 Hz, 1H), 4.81 (ddd, *J* = 17.8, 7.2, 3.3 Hz, 1H), 3.04 (ddd, *J* = 15.9, 9.7, 3.8 Hz, 1H), 2.80 (dt, *J* = 17.1, 6.7 Hz, 1H), 2.49-2.29 (m, 2H), 2.02 (ddtd, *J* = 27.1, 13.6, 6.9, 2.6 Hz, 1H). <sup>19</sup>F NMR (376 MHz, CDCl<sub>3</sub>): δ -197.58 (dddd, *J* = 50.1, 25.1, 17.6, 5.9 Hz).

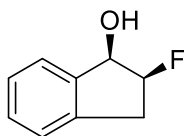

(1*R*,2*S*)-2-Fluoro-2,3-dihydro-1*H*-inden-1-ol (**2l**):<sup>[8]</sup> Colourless crystal, 60 mg, 99% yield, dr (*cis/trans*) > 20:1, ee<sub>cis</sub> = 96%, [α]<sub>D</sub><sup>23</sup> = 53 (c 1.0, CHCl<sub>3</sub>). <sup>1</sup>H NMR (400 MHz, CDCl<sub>3</sub>): δ 7.48 (dd, *J* = 5.1, 3.6 Hz, 1H), 7.34-7.22 (m, 3H), 5.32 (dtd, *J* = 53.8, 4.3, 1.5 Hz, 1H), 5.13 (ddd, *J* = 18.2, 10.4, 4.2 Hz, 1H), 3.33-3.02 (m, 2H), 2.39 (dd, *J* = 10.4, 4.4 Hz, 1H). <sup>19</sup>F NMR (376 MHz, CDCl<sub>3</sub>): δ -201.51 (m).

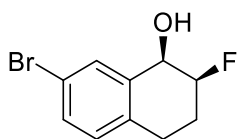

(1*R*,2*S*)-7-Bromo-2-fluoro-1,2,3,4-tetrahydronaphthalen-1-ol (**2m**): Colourless crystal, 96 mg, 98% yield, dr (*cis/trans*) > 20:1, ee<sub>cis</sub> = 99%, [α]<sub>D</sub><sup>23</sup> = 43.4 (c 1.0, CHCl<sub>3</sub>). <sup>1</sup>H NMR (400 MHz, CDCl<sub>3</sub>): δ 7.68 (d, *J* = 2.1 Hz, 1H), 7.34 (dd, *J* = 8.2, 2.2 Hz, 1H), 6.99 (d, *J* = 8.2 Hz, 1H), 5.00 (ddt, *J* = 49.9, 7.8, 2.7 Hz, 1H), 4.72 (ddd, *J* = 20.1, 8.3, 3.3 Hz, 1H), 2.97 (dt, *J* = 17.4, 7.2 Hz, 1H), 2.72 (dt, *J* = 17.2, 6.2 Hz, 1H), 2.45 (dd, *J* = 8.2, 2.6 Hz, 1H), 2.44-2.29 (m, 1H), 2.10-1.85 (m, 1H). <sup>13</sup>C NMR (100 MHz, CDCl<sub>3</sub>): δ 138.0 (d, *J* = 3.6 Hz), 134.6, 131.8, 131.2, 130.1, 120.2, 90.6 (d, *J* = 173.6 Hz), 68.8 (d, *J* = 19.6 Hz), 24.8 (d, *J* = 6.6 Hz), 24.7 (d, *J* = 18.8 Hz). <sup>19</sup>F NMR (376 MHz, CDCl<sub>3</sub>): δ -200.28 (dddd, *J* = 50.2, 30.3, 20.4, 6.4 Hz). HRMS (ESI/ion trap): *m/z* [M + Na]<sup>+</sup> calcd for C<sub>10</sub>H<sub>10</sub>BrFNaO 266.9797, found 266.9786.

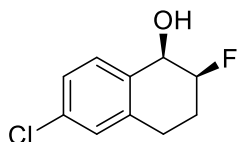

(1*R*,2*S*)-6-Chloro-2-fluoro-1,2,3,4-tetrahydronaphthalen-1-ol (**2n**): Colourless crystal, 79 mg, 99% yield, dr (*cis/trans*) > 20:1, ee<sub>cis</sub> = 99%, [α]<sub>D</sub><sup>23</sup> = 58.4 (c 1.0, CHCl<sub>3</sub>). <sup>1</sup>H NMR (400 MHz, CDCl<sub>3</sub>): δ 7.44 (d, *J* = 8.3 Hz, 1H), 7.21 (dd, *J* = 8.3, 2.1 Hz, 1H), 7.11 (d, *J* = 2.1 Hz, 1H), 4.98 (ddt, *J* = 49.8, 8.2, 2.9 Hz, 1H), 4.73 (ddd, *J* = 18.9, 7.7,

3.3 Hz, 1H), 3.00 (dt,  $J = 15.5, 7.1$  Hz, 1H), 2.75 (dt,  $J = 17.3, 6.4$  Hz, 1H), 2.45 (dd,  $J = 7.7, 2.7$  Hz, 1H), 2.41-2.30 (m, 1H), 2.07-1.90 (m, 1H).  $^{13}\text{C}$  NMR (100 MHz,  $\text{CDCl}_3$ ):  $\delta$  137.6, 134.2 (d,  $J = 4.2$  Hz), 133.9, 130.6, 128.2, 127.0, 90.8 (d,  $J = 173.7$  Hz), 68.7 (d,  $J = 19.5$  Hz), 25.4 (d,  $J = 8.7$  Hz), 24.5 (d,  $J = 20.2$  Hz).  $^{19}\text{F}$  NMR (376 MHz,  $\text{CDCl}_3$ ):  $\delta$  -199.05 (m).

HRMS (ESI/ion trap):  $m/z$   $[\text{M} + \text{Na}]^+$  calcd for  $\text{C}_{10}\text{H}_{10}\text{ClFNaO}$  223.0302, found 223.0292.

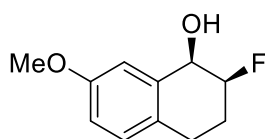

(1*R*,2*S*)-2-Fluoro-7-methoxy-1,2,3,4-tetrahydronaphthalen-1-ol (**2o**):<sup>[9]</sup> Colourless crystal, 78 mg, 99% yield, dr (*cis/trans*) > 20:1,  $ee_{cis} = 99\%$ ,  $[\alpha]_{\text{D}}^{23} = 43.6$  (c 1.0,  $\text{CHCl}_3$ ).  $^1\text{H}$  NMR (400 MHz,  $\text{CDCl}_3$ ):  $\delta$  7.06 (d,  $J = 2.8$  Hz, 1H), 7.04 (d,  $J = 8.4$  Hz, 1H), 6.81 (dd,  $J = 8.4, 2.8$  Hz, 1H), 4.99 (ddt,  $J = 49.9, 8.3, 2.9$  Hz, 1H), 4.75 (dd,  $J = 18.9, 3.3$  Hz, 1H), 3.80 (s, 3H), 2.96 (dt,  $J = 15.3, 7.0$  Hz, 1H), 2.72 (dt,  $J = 16.7, 7.0$  Hz, 1H), 2.42-2.30 (m, 1H), 2.27 (br, 1H), 2.09-1.89 (m, 1H).  $^{19}\text{F}$  NMR (376 MHz,  $\text{CDCl}_3$ ):  $\delta$  -198.97 (dddd,  $J = 48.5, 28.0, 18.6, 6.0$  Hz).

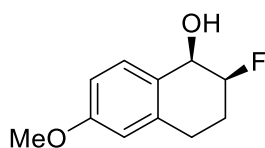

(1*R*,2*S*)-2-Fluoro-6-methoxy-1,2,3,4-tetrahydronaphthalen-1-ol (**2p**):<sup>[9]</sup> Colourless crystal, 78 mg, 99% yield, dr (*cis/trans*) > 20:1,  $ee_{cis} = 99\%$ ,  $[\alpha]_{\text{D}}^{23} = 18.3$  (c 1.0,  $\text{CHCl}_3$ ).  $^1\text{H}$  NMR (400 MHz,  $\text{CDCl}_3$ ):  $\delta$  7.40 (d,  $J = 8.5$  Hz, 1H), 6.81 (dd,  $J = 8.6, 2.7$  Hz, 1H), 6.64 (d,  $J = 2.7$  Hz, 1H), 4.94 (ddt,  $J = 49.4, 9.2, 3.1$  Hz, 1H), 4.78 (ddd,  $J = 16.1, 6.7, 3.4$  Hz, 1H), 3.79 (s, 3H), 3.08-2.91 (m, 1H), 2.78 (dt,  $J = 17.1, 7.1$  Hz, 1H), 2.43-2.33 (m, 1H), 2.31 (dd,  $J = 6.6, 2.8$  Hz, 1H), 2.10-1.91 (m, 1H).  $^{13}\text{C}$  NMR (100 MHz,  $\text{CDCl}_3$ ):  $\delta$  159.6, 137.2, 130.9, 127.9 (d,  $J = 4.9$  Hz), 113.1, 113.0, 91.4 (d,  $J = 174.3$  Hz), 68.7 (d,  $J = 19.0$  Hz), 55.4, 26.4 (d,  $J = 9.5$  Hz), 24.2 (d,  $J = 19.7$  Hz).  $^{19}\text{F}$  NMR (376 MHz,



CDCl<sub>3</sub>):  $\delta$  -195.87 (m). HRMS (ESI/ion trap):  $m/z$  [M + Na]<sup>+</sup> calcd for C<sub>11</sub>H<sub>13</sub>FNaO<sub>2</sub> 219.0797, found 219.0787.

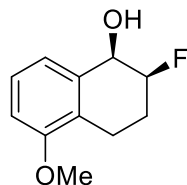

(1*R*,2*S*)-2-Fluoro-5-methoxy-1,2,3,4-tetrahydronaphthalen-1-ol (**2q**): Colourless crystal, 78 mg, 99% yield, dr (*cis/trans*) > 20:1, ee<sub>*cis*</sub> = 99%, [ $\alpha$ ]<sub>D</sub><sup>23</sup> = 10.4 (c 1.0, CHCl<sub>3</sub>). <sup>1</sup>H NMR (400 MHz, CDCl<sub>3</sub>):  $\delta$  7.24 (t,  $J$  = 8.4 Hz, 1H), 7.12 (d,  $J$  = 7.7 Hz, 1H), 6.79 (d,  $J$  = 8.1 Hz, 1H), 4.96 (ddt,  $J$  = 49.7, 8.9, 3.0 Hz, 1H), 4.79 (ddd,  $J$  = 17.3, 7.1, 3.3 Hz, 1H), 3.83 (s, 3H), 2.91 (dtd,  $J$  = 18.0, 6.6, 2.1 Hz, 1H), 2.68 (dt,  $J$  = 18.0, 6.9 Hz, 1H), 2.49-2.23 (m, 2H), 1.99 (ddtd,  $J$  = 26.9, 13.6, 6.8, 2.6 Hz, 1H). <sup>13</sup>C NMR (100 MHz, CDCl<sub>3</sub>):  $\delta$  156.8, 136.8 (d,  $J$  = 4.3 Hz), 127.3, 124.9, 121.1, 109.3, 91.2 (d,  $J$  = 173.6 Hz), 69.0 (d,  $J$  = 19.1 Hz), 55.50, 23.69 (d,  $J$  = 19.7 Hz), 20.24 (d,  $J$  = 8.8 Hz). <sup>19</sup>F NMR (376 MHz, CDCl<sub>3</sub>):  $\delta$  -197.72 (m). HRMS (ESI/ion trap):  $m/z$  [M + Na]<sup>+</sup> calcd for C<sub>11</sub>H<sub>13</sub>FNaO<sub>2</sub> 219.0797, found 219.0787.

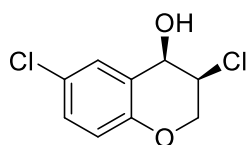

(3*S*,4*R*)-3,6-Dichlorochroman-4-ol (**2r**): Colourless crystal, 83 mg, 95% yield, dr (*cis/trans*) > 20:1, ee<sub>*cis*</sub> = 99%, [ $\alpha$ ]<sub>D</sub><sup>23</sup> = 45.9 (c 1.0, CHCl<sub>3</sub>). <sup>1</sup>H NMR (400 MHz, CDCl<sub>3</sub>):  $\delta$  7.38 (d,  $J$  = 2.5 Hz, 1H), 7.19 (dd,  $J$  = 8.8, 2.6 Hz, 1H), 6.80 (d,  $J$  = 8.8 Hz, 1H), 4.88 (dd,  $J$  = 7.2, 3.7 Hz, 1H), 4.46 (dt,  $J$  = 6.9, 3.4 Hz, 1H), 4.41-4.26 (m, 2H), 2.49 (d,  $J$  = 7.2 Hz, 1H). <sup>13</sup>C NMR (100 MHz, CDCl<sub>3</sub>):  $\delta$  151.8, 130.3, 129.2, 126.4, 123.3, 118.2, 66.1, 66.0, 57.3. HRMS (ESI/ion trap):  $m/z$  [M + H - H<sub>2</sub>O]<sup>+</sup> calcd for C<sub>9</sub>H<sub>7</sub>ClO<sub>2</sub> 200.9874, found 200.9865.

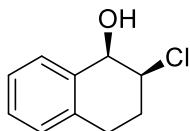

(1*R*,2*S*)-2-Chloro-1,2,3,4-tetrahydronaphthalen-1-ol (**2s**):<sup>[7]</sup> Colourless crystal, 70 mg, 96% yield, dr (*cis/trans*) > 20:1, ee<sub>cis</sub> = 97%, [α]<sub>D</sub><sup>23</sup> = 22.2 (c 1.0, CHCl<sub>3</sub>). <sup>1</sup>H NMR (400 MHz, CDCl<sub>3</sub>): δ 7.55-7.44 (m, 1H), 7.30-7.19 (m, 2H), 7.17-7.06 (m, 1H), 4.86 (dd, *J* = 7.5, 3.4 Hz, 1H), 4.55 (dt, *J* = 8.7, 3.1 Hz, 1H), 3.12 (dt, *J* = 17.3, 6.5 Hz, 1H), 2.85 (dt, *J* = 17.3, 6.6 Hz, 1H), 2.56-2.33 (m, 2H), 2.26-2.14 (m, 1H).

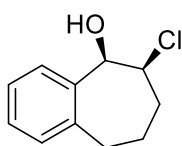

(5*R*,6*S*)-6-Chloro-6,7,8,9-tetrahydro-5H-benzo[7]annulen-5-ol (**2t**):<sup>[7]</sup> Colourless crystal, 78 mg, 99% yield, dr (*cis/trans*) > 20:1, ee<sub>cis</sub> = %, [α]<sub>D</sub><sup>23</sup> = -170.0 (c 1.0, CHCl<sub>3</sub>). <sup>1</sup>H NMR (400 MHz, CDCl<sub>3</sub>): δ 7.33-7.27 (m, 1H), 7.25-7.17 (m, 2H), 7.13-7.07 (m, 1H), 5.08 (s, 1H), 4.40 (dd, *J* = 9.2, 3.0 Hz, 1H), 3.27-3.00 (m, 1H), 2.64 (dd, *J* = 14.2, 8.6 Hz, 1H), 2.57-2.43 (m, 2H), 2.25 (ddt, *J* = 14.2, 7.3, 3.4 Hz, 1H), 1.97-1.83 (m, 1H), 1.71-1.54 (m, 1H).

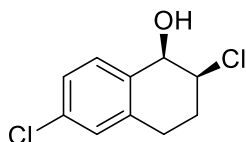

(1*R*,2*S*)-2,6-Dichloro-1,2,3,4-tetrahydronaphthalen-1-ol (**2u**):<sup>[10]</sup> Colourless crystal, 85 mg, 98% yield, dr (*cis/trans*) > 20:1, ee<sub>cis</sub> = 99%, [α]<sub>D</sub><sup>23</sup> = 14.6 (c 1.0, CHCl<sub>3</sub>). <sup>1</sup>H NMR (400 MHz, CDCl<sub>3</sub>): δ 7.43 (d, *J* = 8.3 Hz, 1H), 7.20 (dd, *J* = 8.4, 2.2 Hz, 1H), 7.11 (d, *J* = 2.2 Hz, 1H), 4.81 (dd, *J* = 8.0, 3.4 Hz, 1H), 4.53 (dt, *J* = 8.2, 3.0 Hz, 1H), 3.09 (dt, *J* = 17.4, 6.9 Hz, 1H), 2.80 (dt, *J* = 17.4, 6.3 Hz, 1H), 2.49 (d, *J* = 8.0 Hz, 1H), 2.39 (ddt, *J* = 14.2, 8.1, 6.1 Hz, 1H), 2.19 (dddd, *J* = 13.9, 8.3, 6.4, 2.7 Hz, 1H).

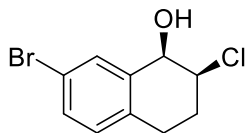

(1*R*,2*S*)-7-Bromo-2-chloro-1,2,3,4-tetrahydronaphthalen-1-ol (**2v**):<sup>[7]</sup> Colourless crystal, 103 mg, 99% yield, dr (*cis/trans*) > 20:1, ee<sub>*cis*</sub> = 99%,  $[\alpha]_{\text{D}}^{23} = 21.2$  (c 1.0, CHCl<sub>3</sub>). <sup>1</sup>H NMR (400 MHz, CDCl<sub>3</sub>):  $\delta$  7.67 (d, *J* = 2.1 Hz, 1H), 7.35 (dd, *J* = 8.2, 2.1 Hz, 1H), 6.99 (d, *J* = 8.2 Hz, 1H), 4.81 (dd, *J* = 8.6, 3.5 Hz, 1H), 4.56 (dt, *J* = 7.6, 3.0 Hz, 1H), 3.14-2.98 (m, 1H), 2.76 (dt, *J* = 17.4, 6.0 Hz, 1H), 2.48 (d, *J* = 8.5 Hz, 1H), 2.39 (ddt, *J* = 13.52, 7.4, 5.8 Hz, 1H), 2.20 (dddd, *J* = 14.3, 8.6, 6.3, 2.6 Hz, 1H).

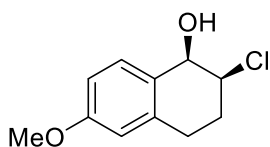

(1*R*,2*S*)-2-Chloro-6-methoxy-1,2,3,4-tetrahydronaphthalen-1-ol (**2w**):<sup>[10]</sup> Colourless crystal, 84 mg, 99% yield, dr (*cis/trans*) > 20:1, ee<sub>*cis*</sub> = 99%,  $[\alpha]_{\text{D}}^{23} = 21.5$  (c 1.0, CHCl<sub>3</sub>). <sup>1</sup>H NMR (400 MHz, CDCl<sub>3</sub>):  $\delta$  7.38 (d, *J* = 8.5 Hz, 1H), 6.80 (dd, *J* = 8.5, 2.6 Hz, 1H), 6.64 (d, *J* = 2.6 Hz, 1H), 4.80 (dd, *J* = 7.0, 3.3 Hz, 1H), 4.49 (dt, *J* = 9.1, 3.1 Hz, 1H), 3.79 (s, 3H), 3.07 (dt, *J* = 17.3, 6.3 Hz, 1H), 2.81 (dt, *J* = 17.3, 6.9 Hz, 1H), 2.45 (d, *J* = 6.9 Hz, 1H), 2.43-2.36 (m, 1H), 2.16 (dtd, *J* = 13.3, 6.4, 2.8 Hz, 1H).

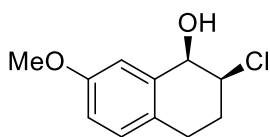

(1*R*,2*S*)-2-Chloro-7-methoxy-1,2,3,4-tetrahydronaphthalen-1-ol (**2x**):<sup>[10]</sup> Colourless crystal, 83 mg, 98% yield, dr (*cis/trans*) > 20:1, ee<sub>*cis*</sub> = 99%,  $[\alpha]_{\text{D}}^{23} = 31.4$  (c 1.0, CHCl<sub>3</sub>). <sup>1</sup>H NMR (400 MHz, CDCl<sub>3</sub>):  $\delta$  7.07-6.98 (m, 2H), 6.82 (dd, *J* = 8.5, 2.8 Hz, 1H), 4.82 (dd, *J* = 8.2, 3.4 Hz, 1H), 4.56 (dt, *J* = 8.1, 3.0 Hz, 1H), 3.80 (s, 3H), 3.02 (dt, *J* = 17.0, 6.9 Hz, 1H), 2.76 (dt, *J* = 16.9, 6.2 Hz, 1H), 2.44 (d, *J* = 8.1 Hz, 1H), 2.46-2.33 (m, 1H), 2.18 (dddd, *J* = 13.9, 8.4, 6.3, 2.6 Hz, 1H).

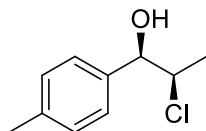

(1*R*,2*R*)-2-Chloro-1-(*p*-tolyl)propan-1-ol (**2y**):<sup>[11]</sup> Colourless oil, 83 mg, 80% yield, dr (*cis/trans*) = 15:1,  $ee_{cis} = 98\%$ ,  $[\alpha]_D^{23} = -29.8$  (c 1.0, CH<sub>2</sub>Cl<sub>2</sub>). <sup>1</sup>H NMR (400 MHz, CDCl<sub>3</sub>):  $\delta$  7.24-7.22 (m, 2H), 7.17-7.16 (m, 2H), 4.54 (d,  $J = 7.6$  Hz, 1H), 4.19 (m, 1H), 2.79 (s, 1H), 2.34 (s, 3H), 1.35 (d,  $J = 6.7$  Hz, 3H).



<sup>1</sup>H NMR (400 MHz, CDCl<sub>3</sub>) of compound **2b**

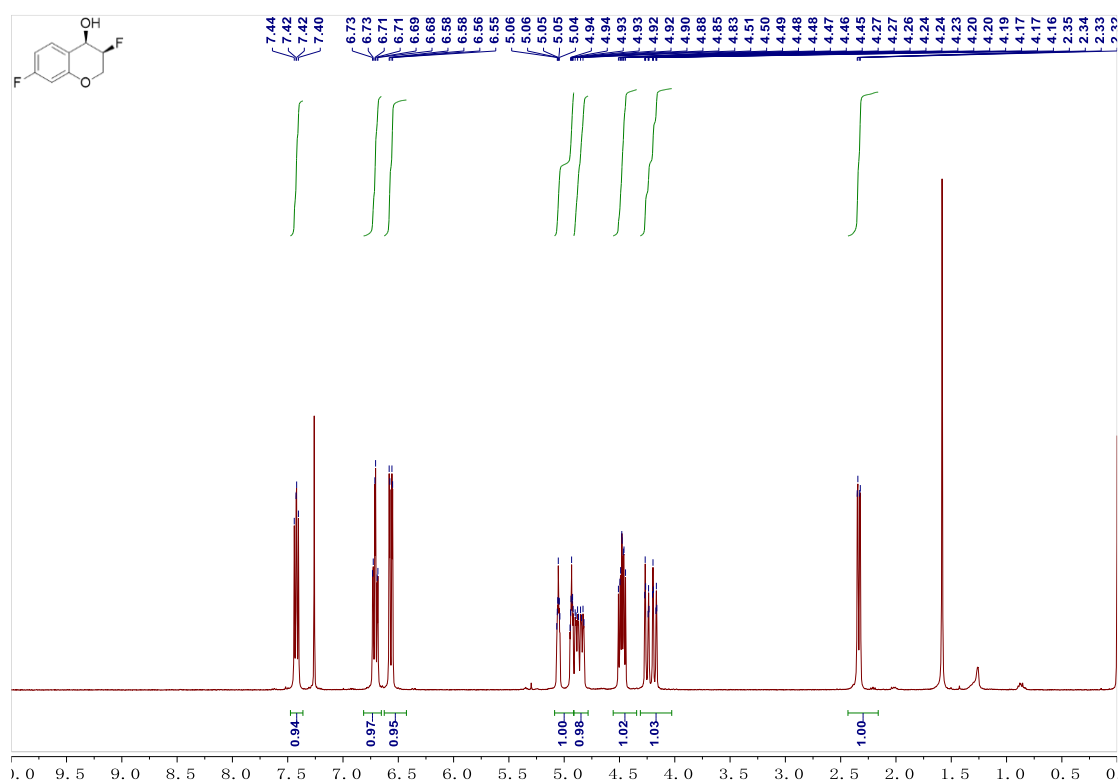

<sup>19</sup>F NMR (400 MHz, CDCl<sub>3</sub>) of compound **2b**

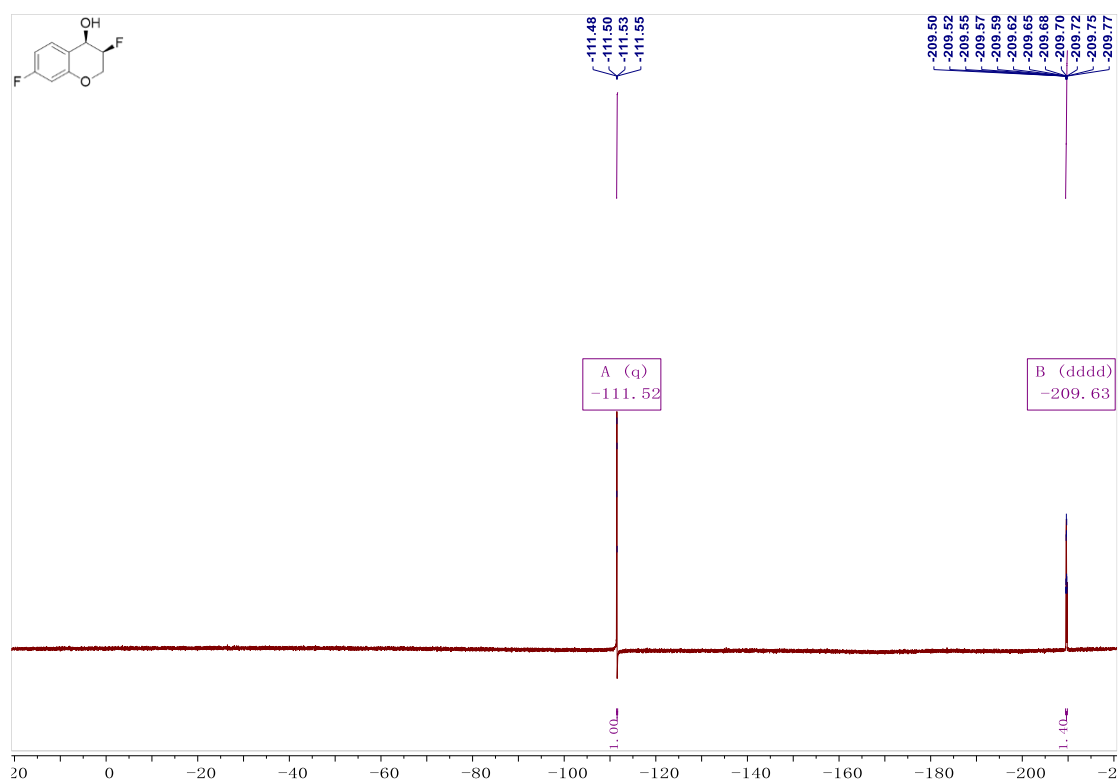

<sup>1</sup>H NMR (400 MHz, CDCl<sub>3</sub>) of compound **2c**

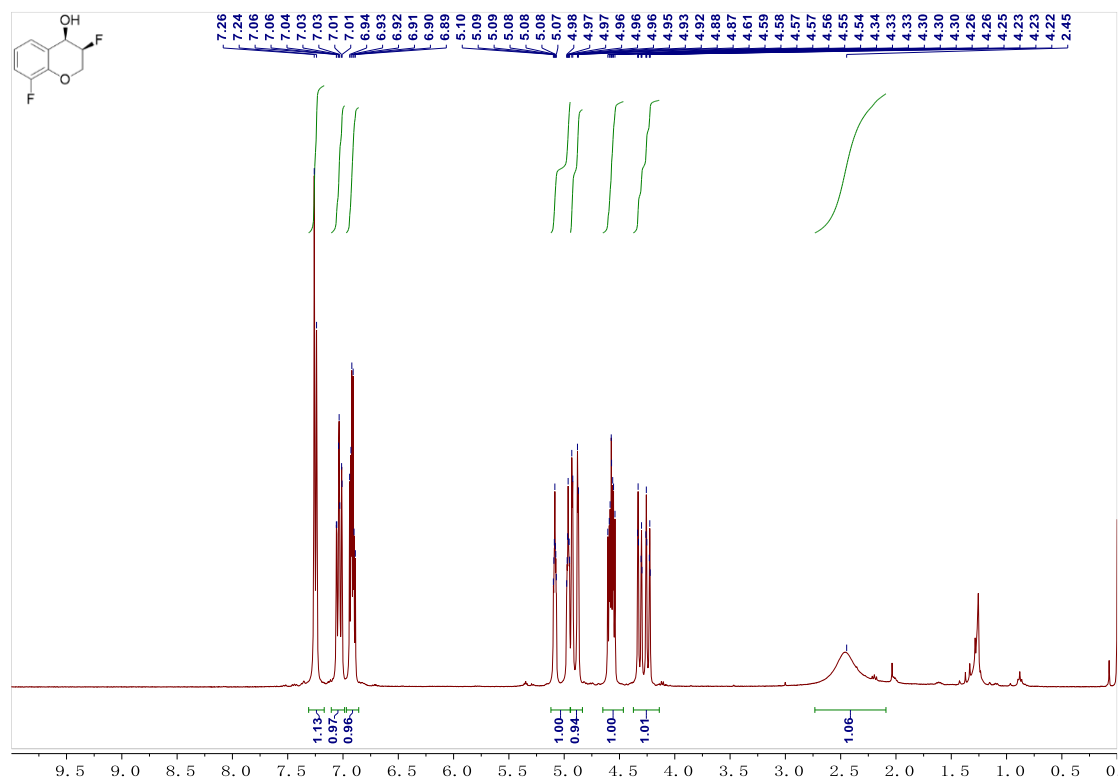

<sup>13</sup>C NMR (100 MHz, CDCl<sub>3</sub>) of compound **2c**

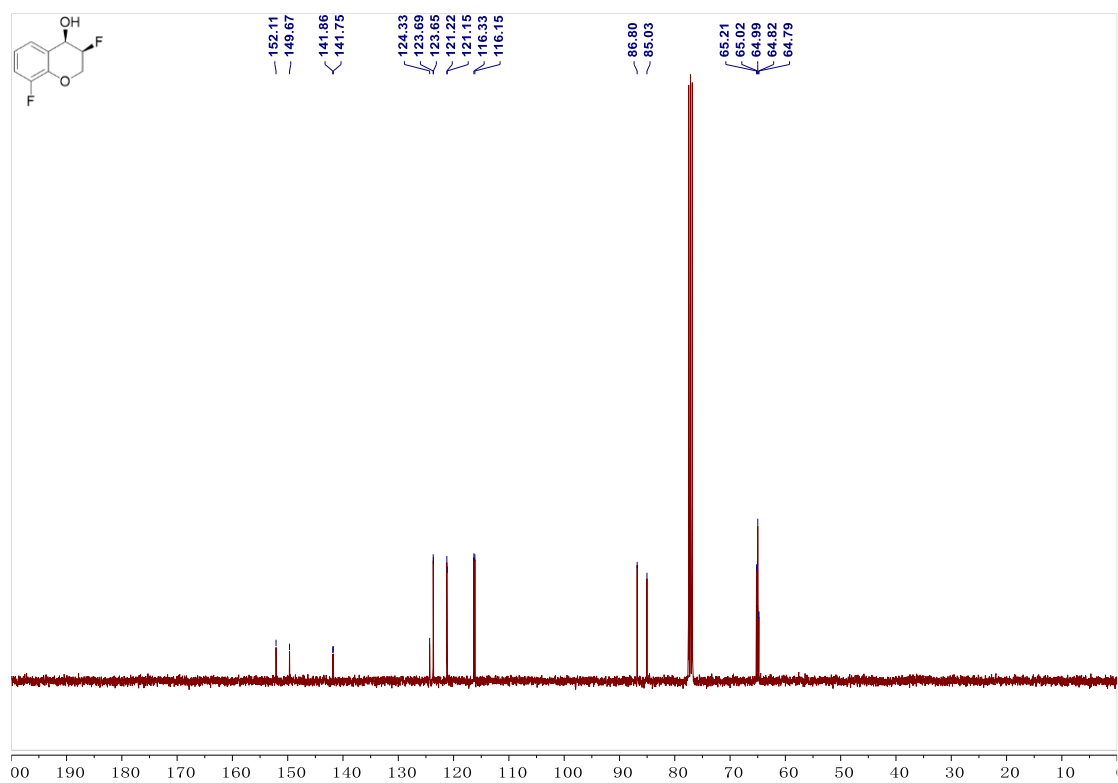

$^{19}\text{F}$  NMR (400 MHz,  $\text{CDCl}_3$ ) of compound **2c**

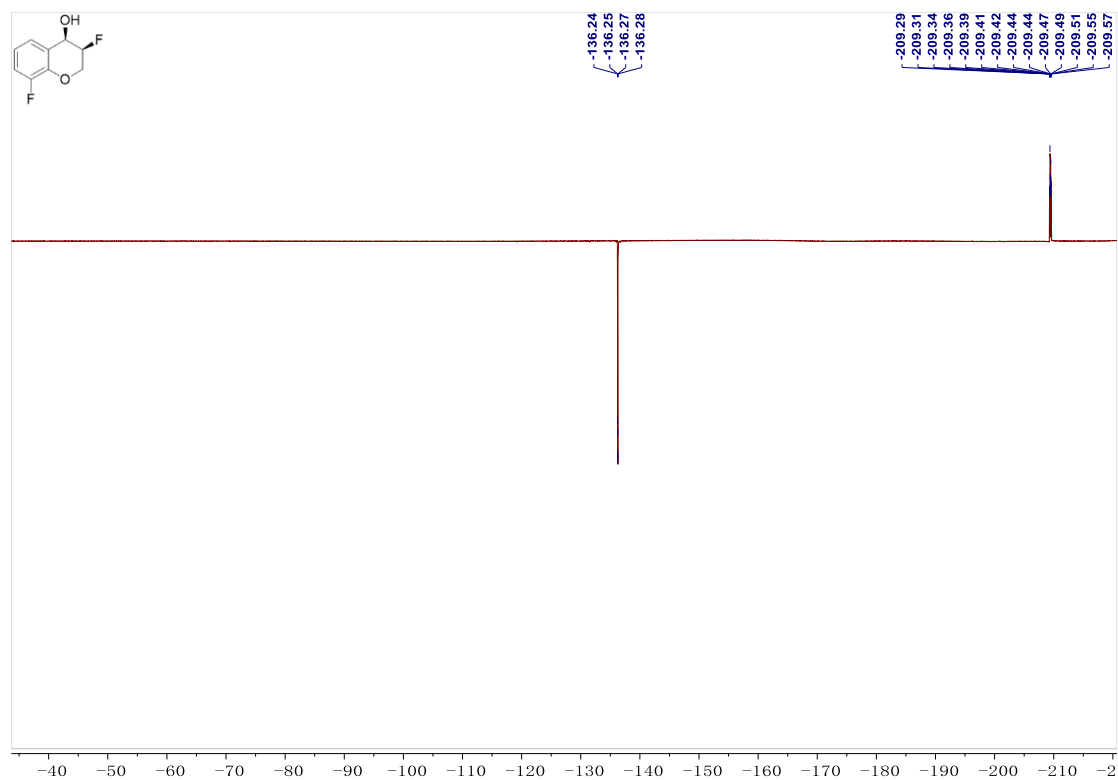

$^1\text{H}$  NMR (400 MHz,  $\text{CDCl}_3$ ) of compound **2d**

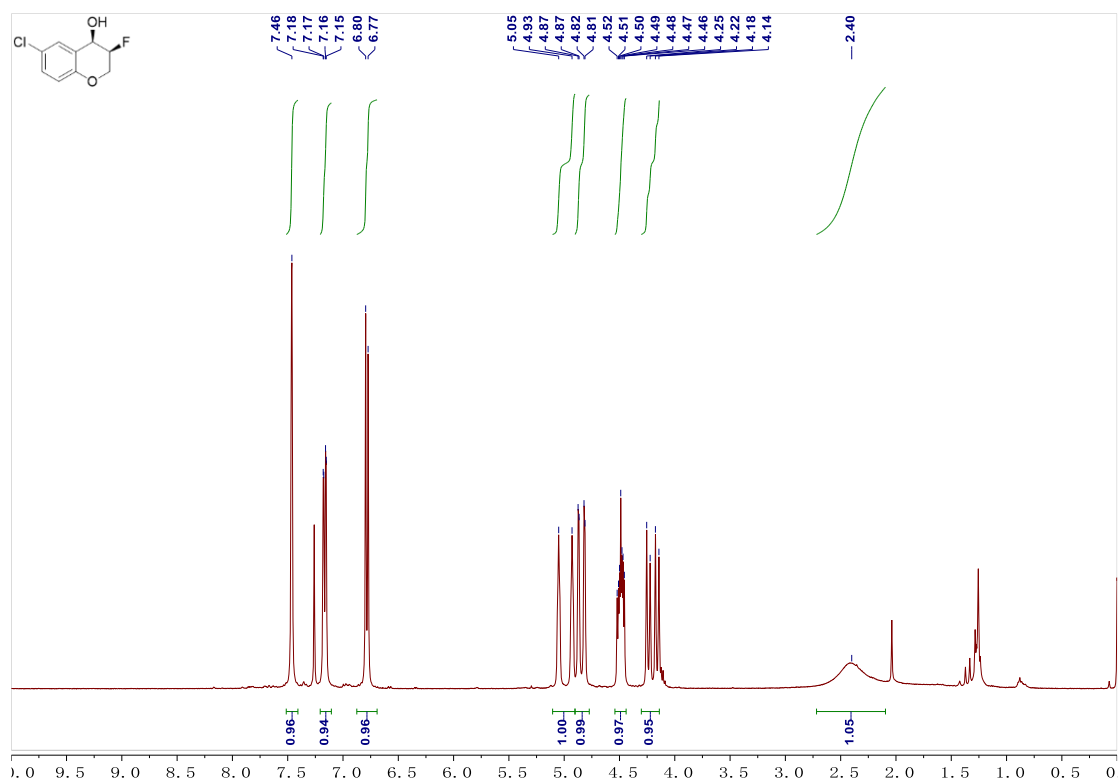



$^{13}\text{C}$  NMR (100 MHz,  $\text{CDCl}_3$ ) of compound **2d**

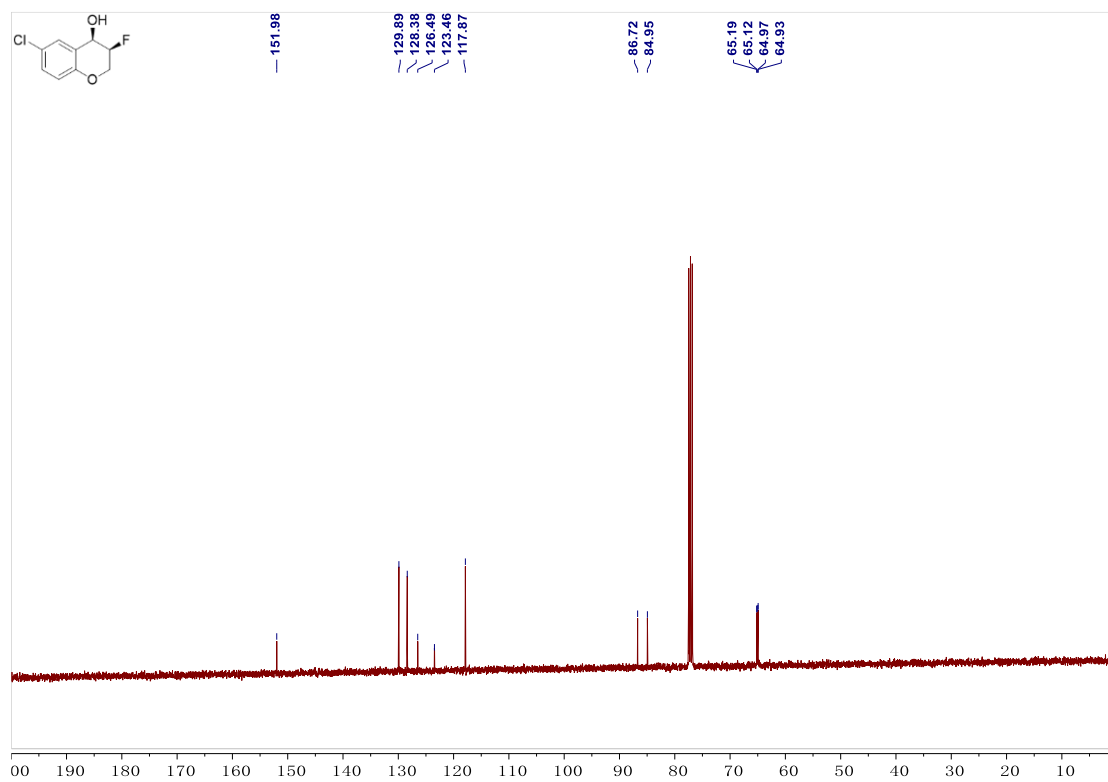

$^{19}\text{F}$  NMR (400 MHz,  $\text{CDCl}_3$ ) of compound **2d**

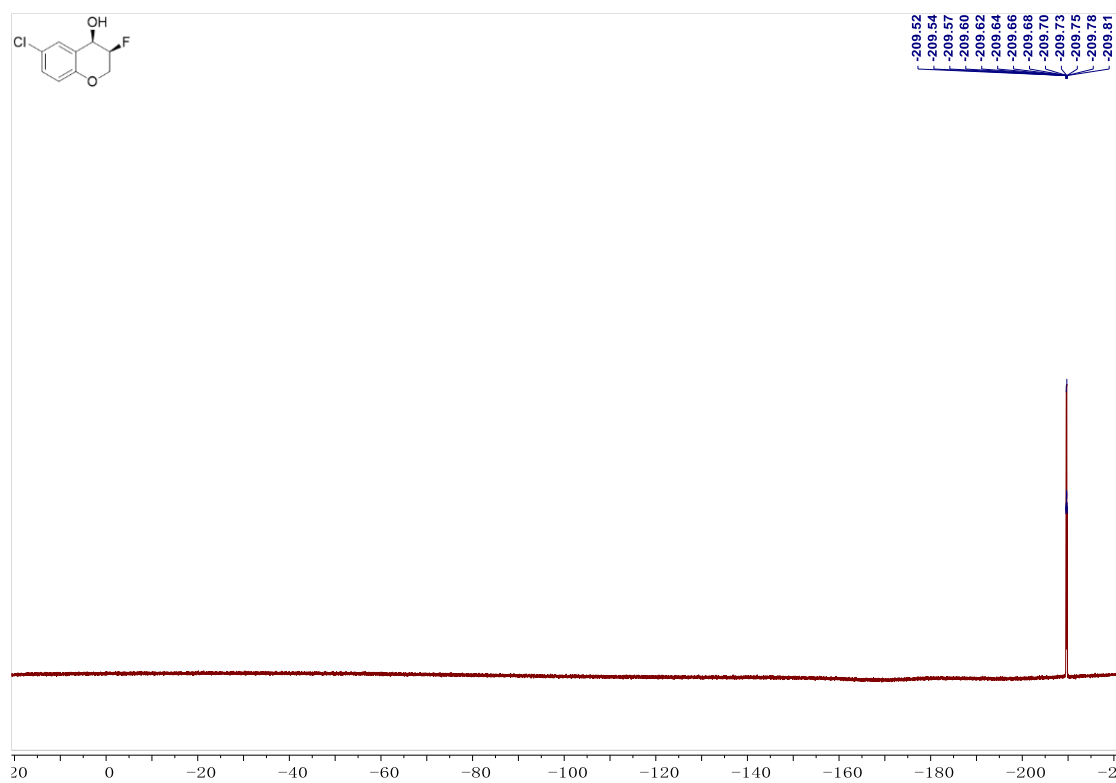

<sup>1</sup>H NMR (400 MHz, CDCl<sub>3</sub>) of compound **2e**

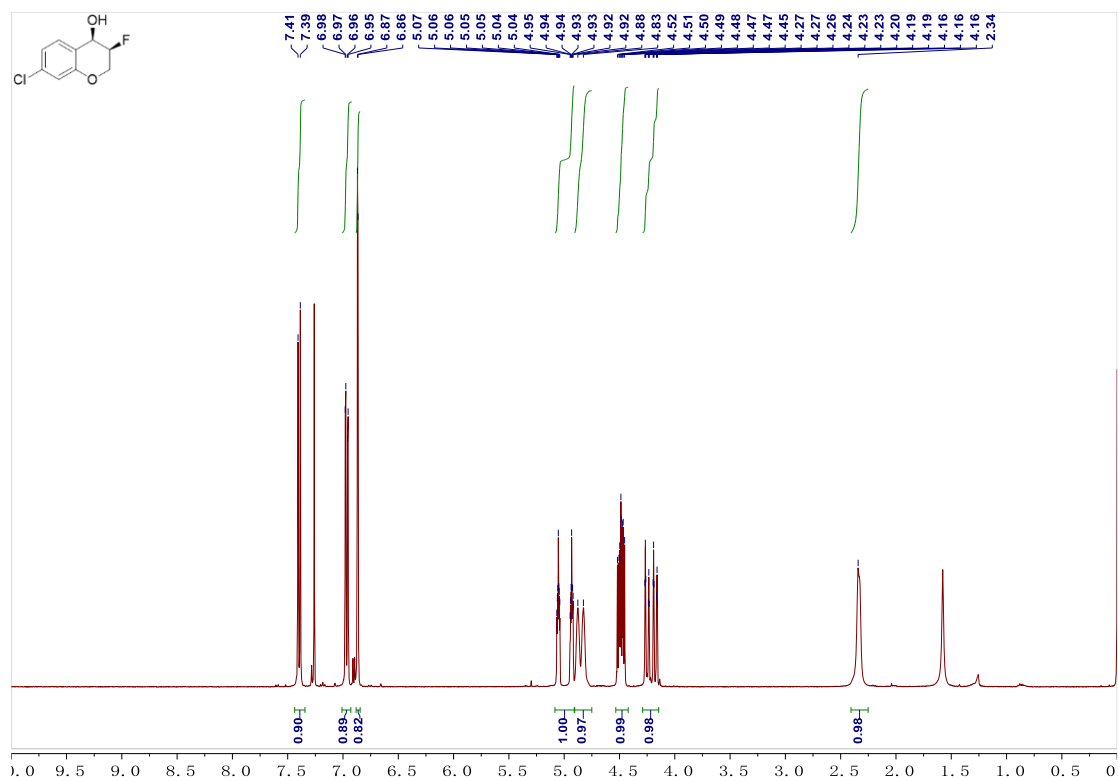

<sup>13</sup>C NMR (100 MHz, CDCl<sub>3</sub>) of compound **2e**

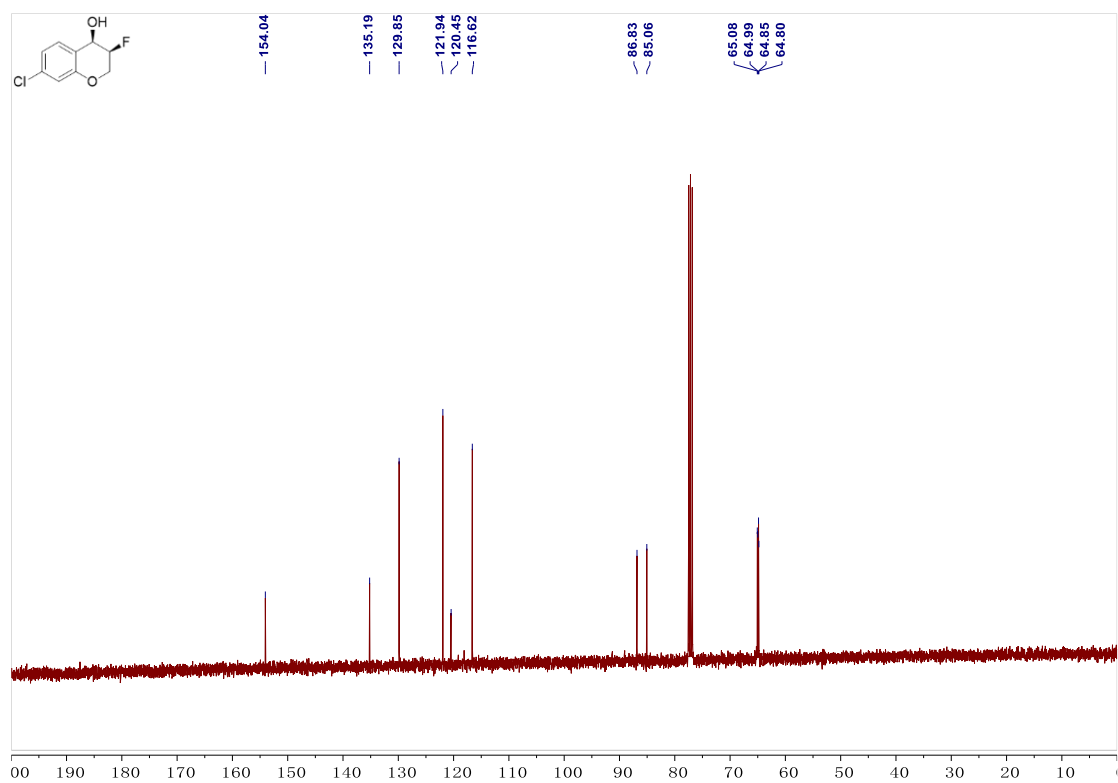

$^{19}\text{F}$  NMR (400 MHz,  $\text{CDCl}_3$ ) of compound **2e**

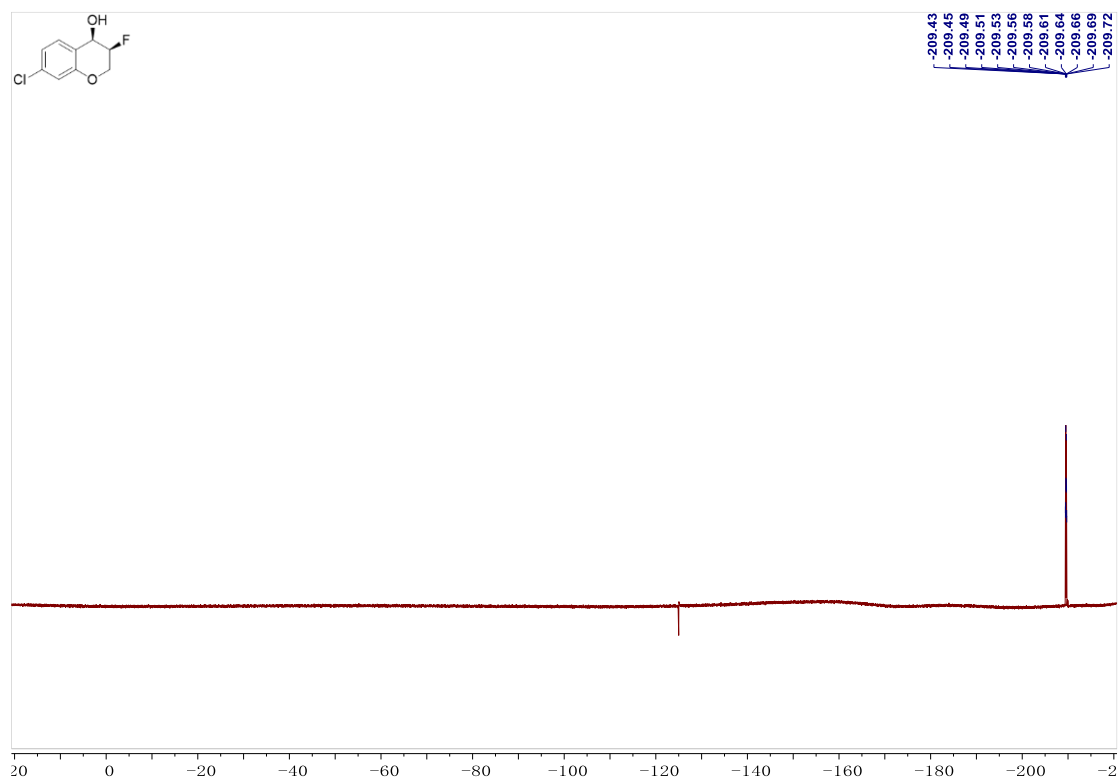

$^1\text{H}$  NMR (400 MHz,  $\text{CDCl}_3$ ) of compound **2f**

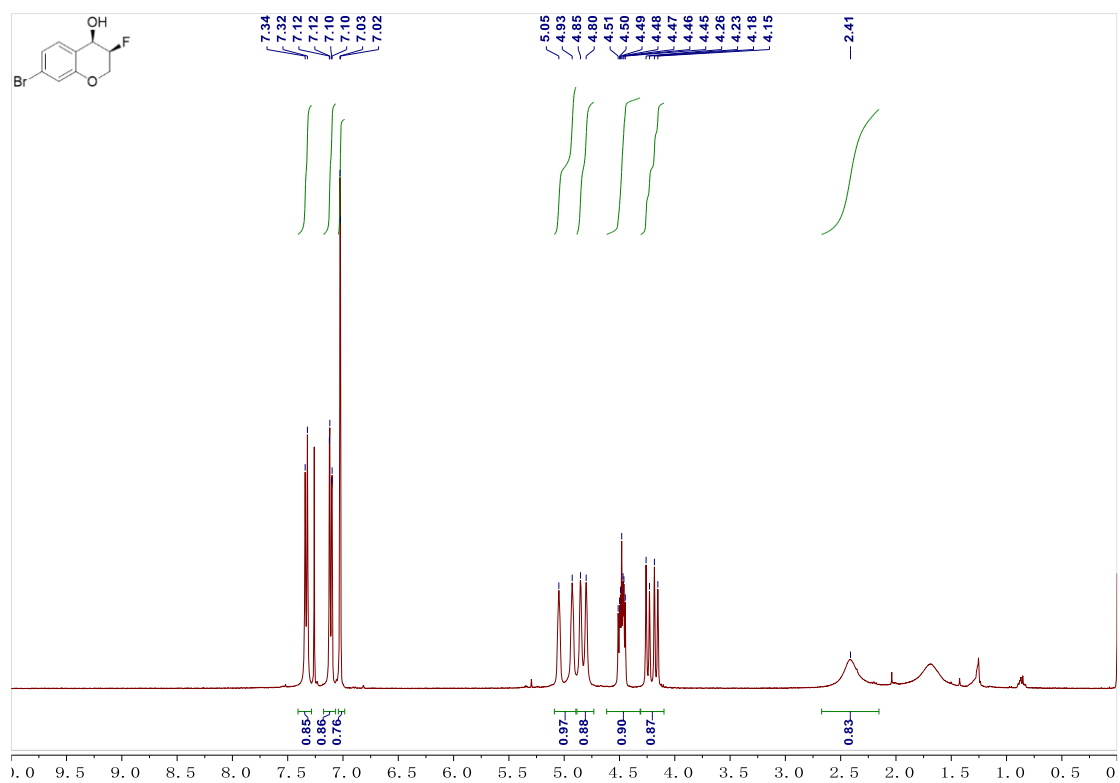

$^{19}\text{F}$  NMR (400 MHz,  $\text{CDCl}_3$ ) of compound **2f**

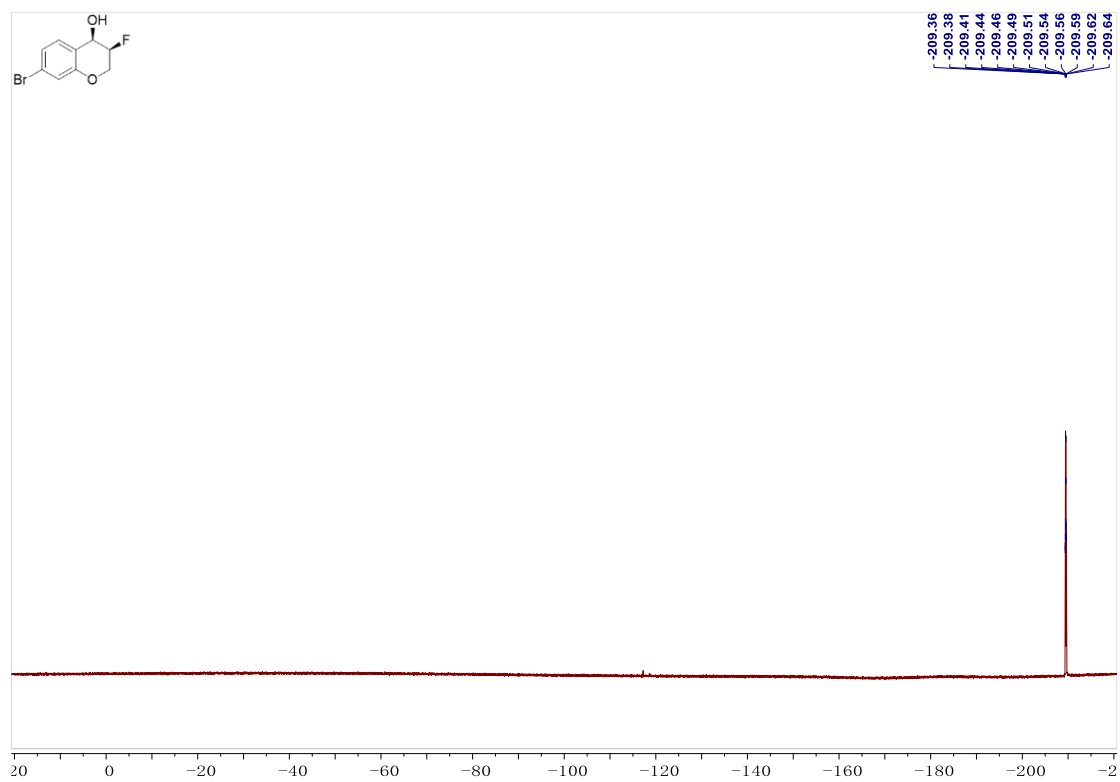

$^1\text{H}$  NMR (400 MHz,  $\text{CDCl}_3$ ) of compound **2g**

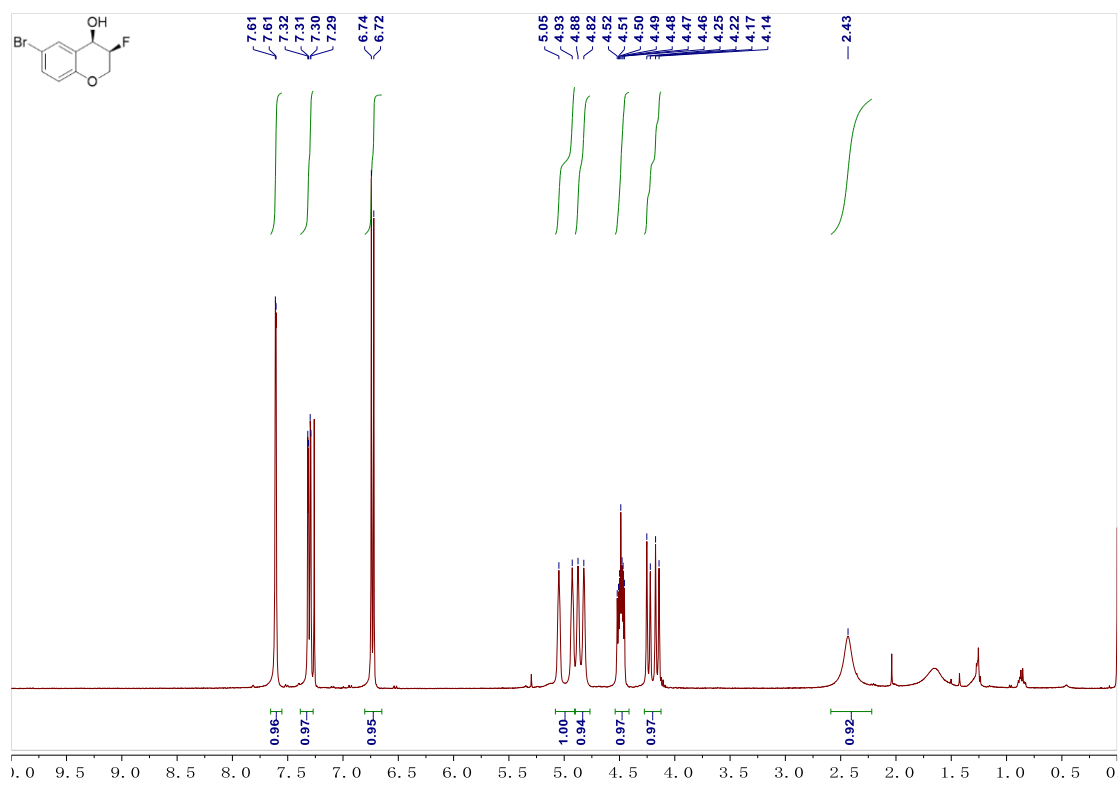

<sup>13</sup>C NMR (100 MHz, CDCl<sub>3</sub>) of compound **2g**

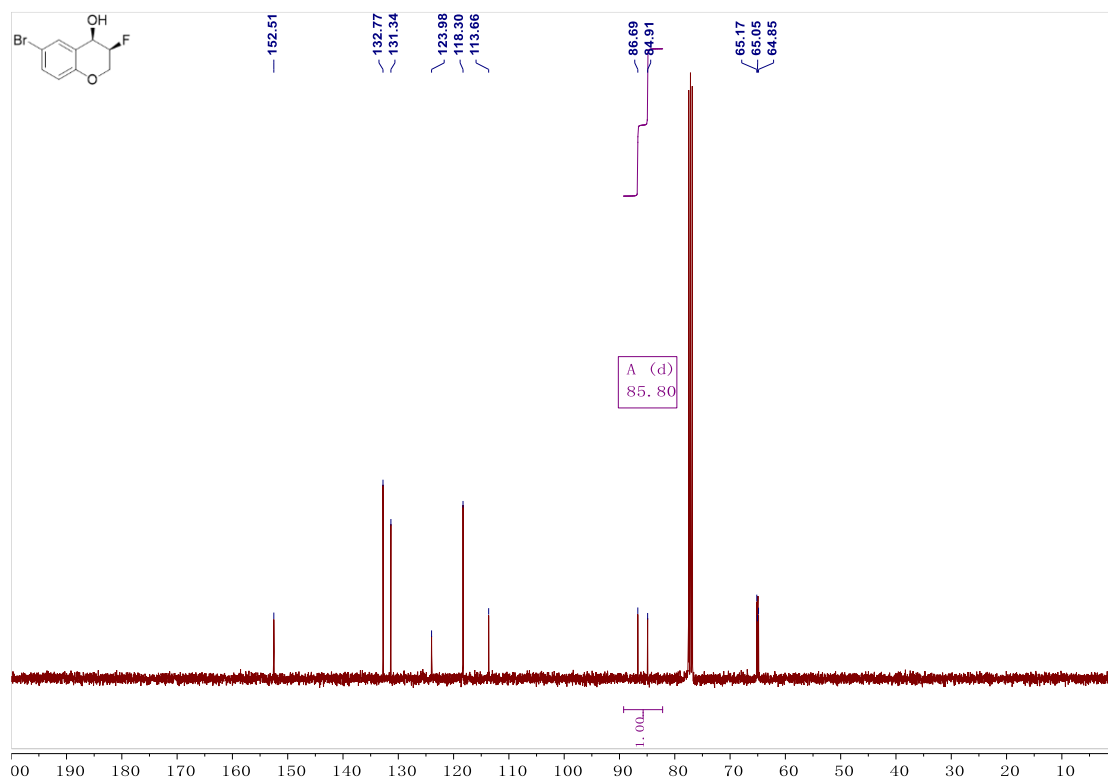

<sup>19</sup>F NMR (400 MHz, CDCl<sub>3</sub>) of compound **2g**

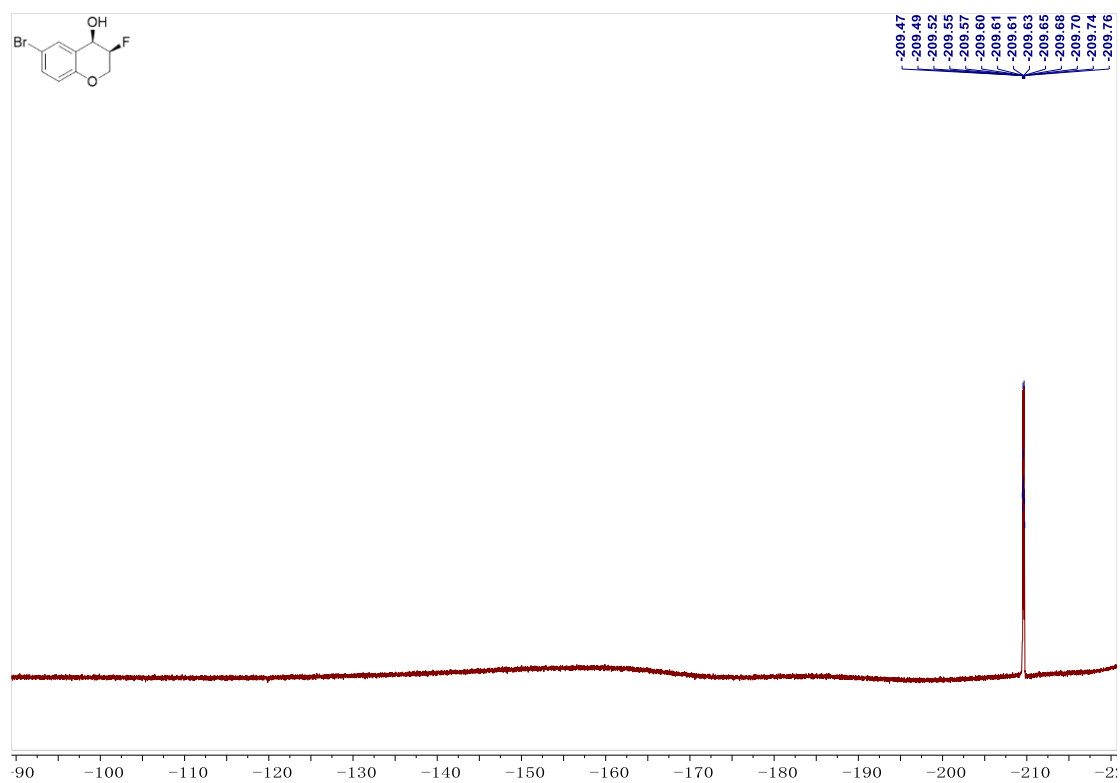

$^1\text{H}$  NMR (400 MHz,  $\text{CDCl}_3$ ) of compound **2h**

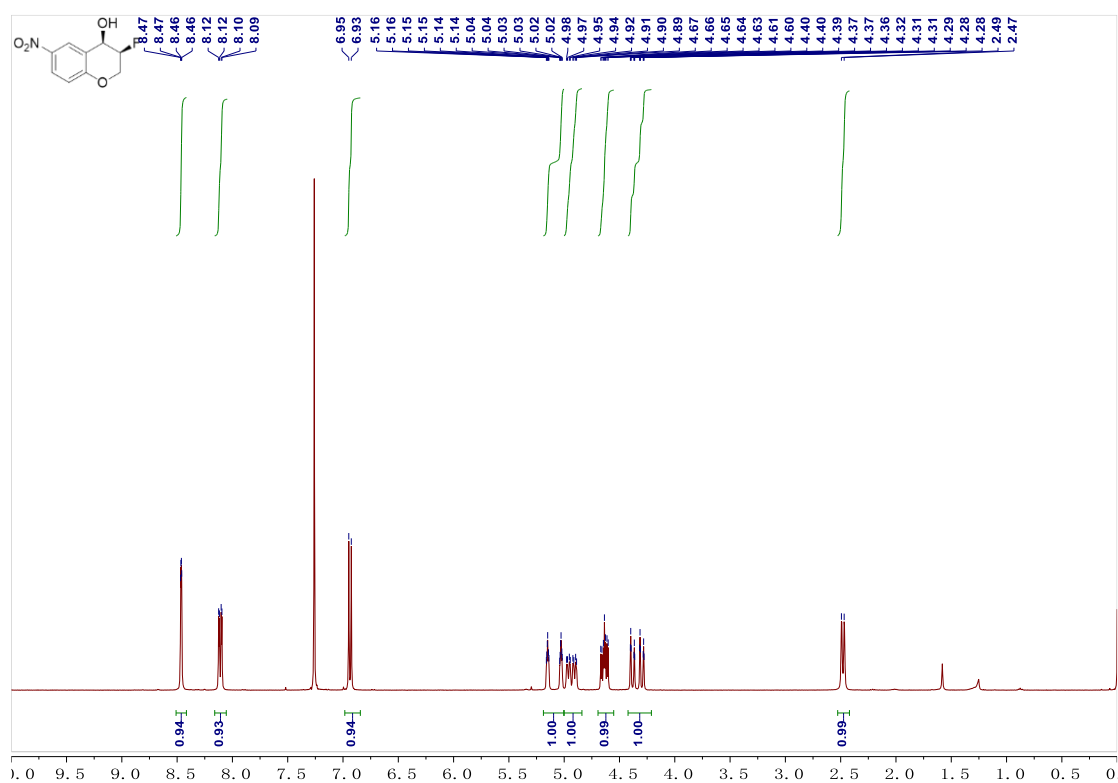

$^{19}\text{F}$  NMR (400 MHz,  $\text{CDCl}_3$ ) of compound **2h**

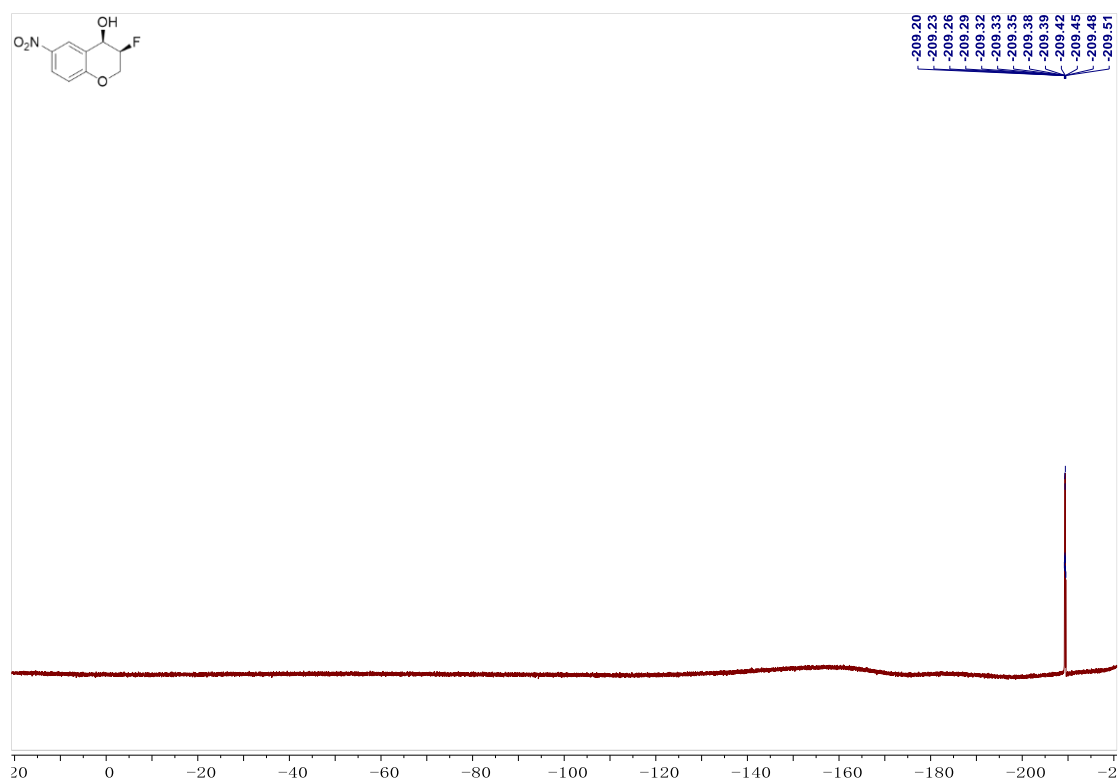

$^1\text{H}$  NMR (400 MHz,  $\text{CDCl}_3$ ) of compound **2i**

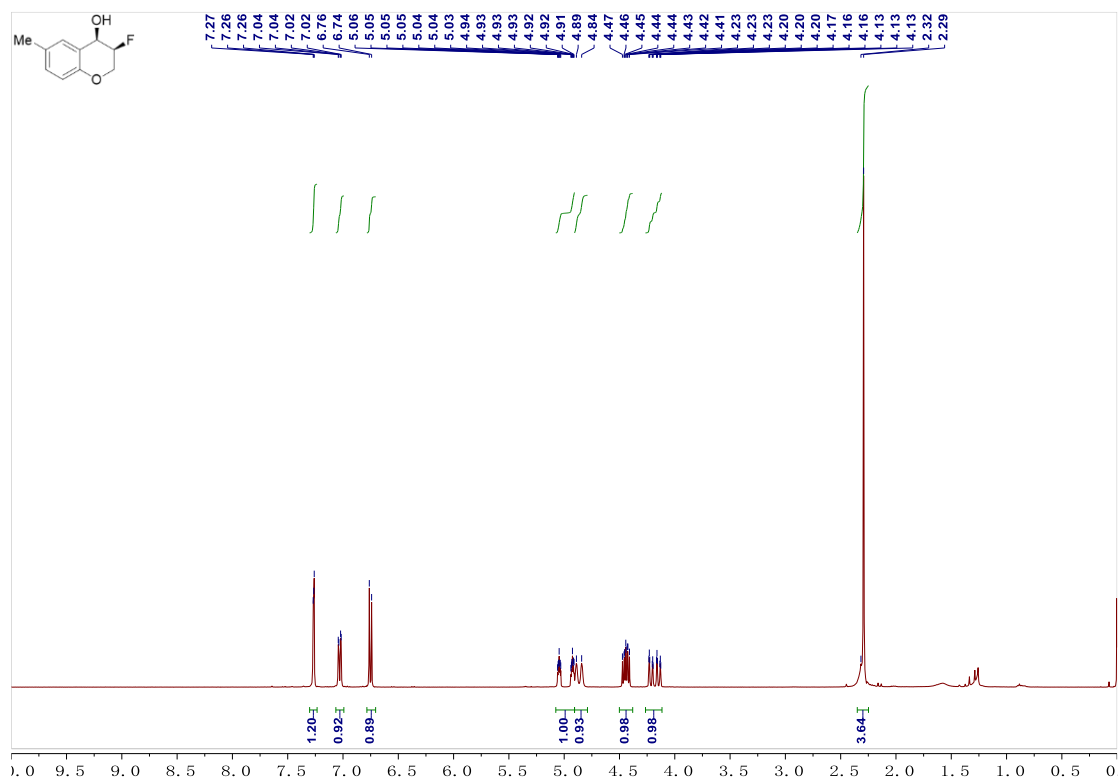

$^{19}\text{F}$  NMR (400 MHz,  $\text{CDCl}_3$ ) of compound **2i**

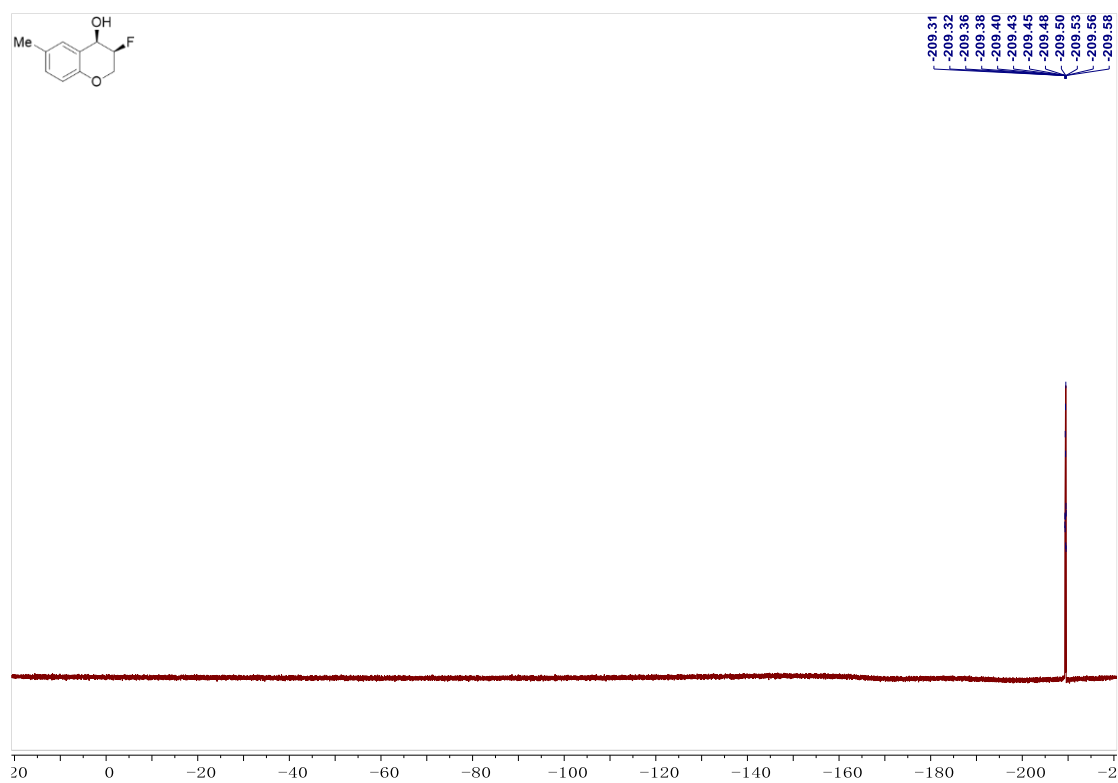

<sup>1</sup>H NMR (400 MHz, CDCl<sub>3</sub>) of compound **2j**

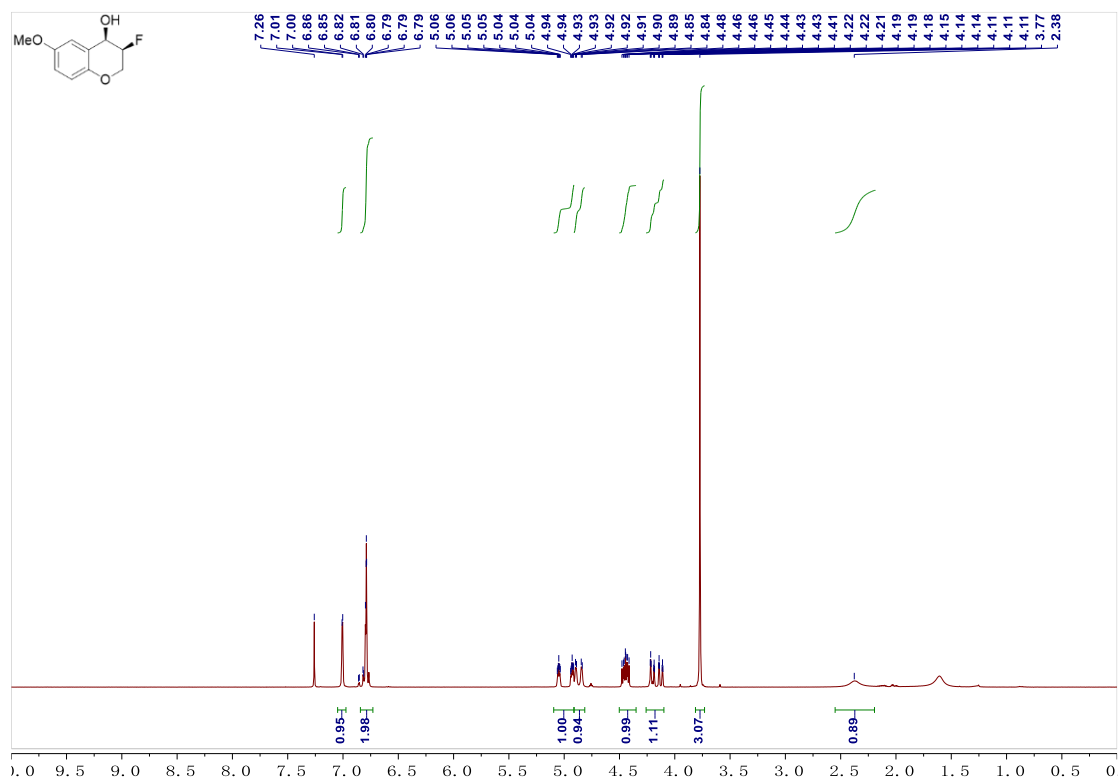

<sup>19</sup>F NMR (400 MHz, CDCl<sub>3</sub>) of compound **2j**

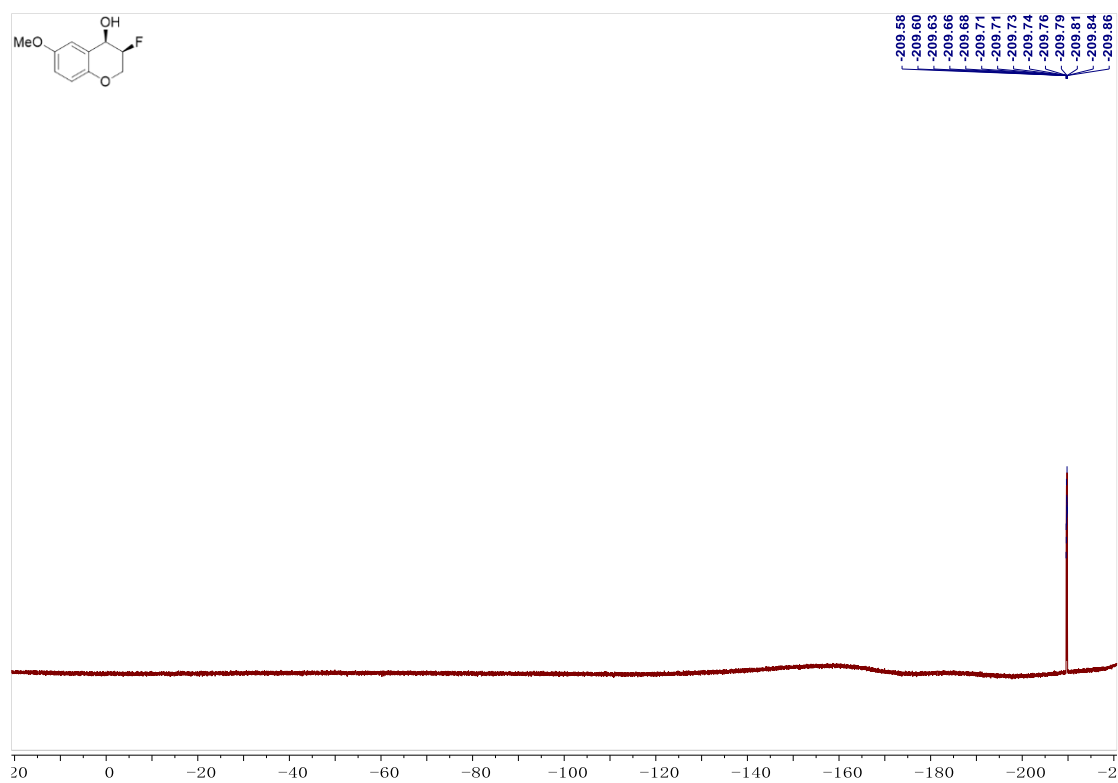



<sup>1</sup>H NMR (400 MHz, CDCl<sub>3</sub>) of compound **2k**

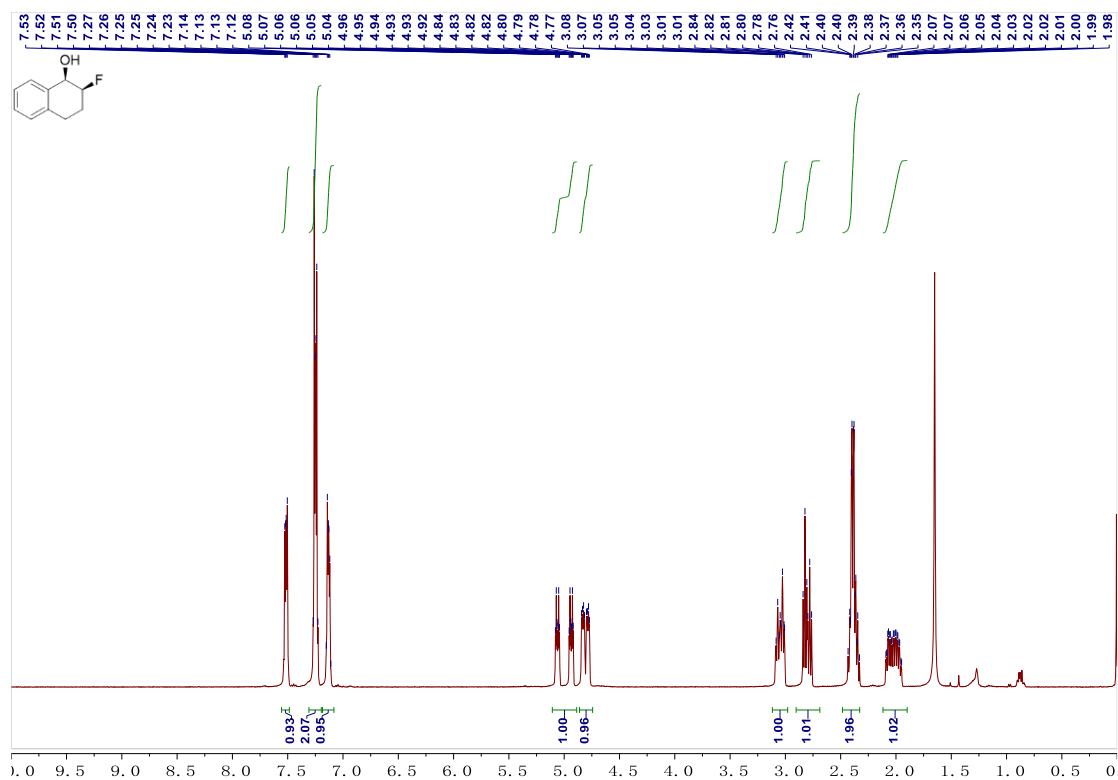

<sup>19</sup>F NMR (400 MHz, CDCl<sub>3</sub>) of compound **2k**

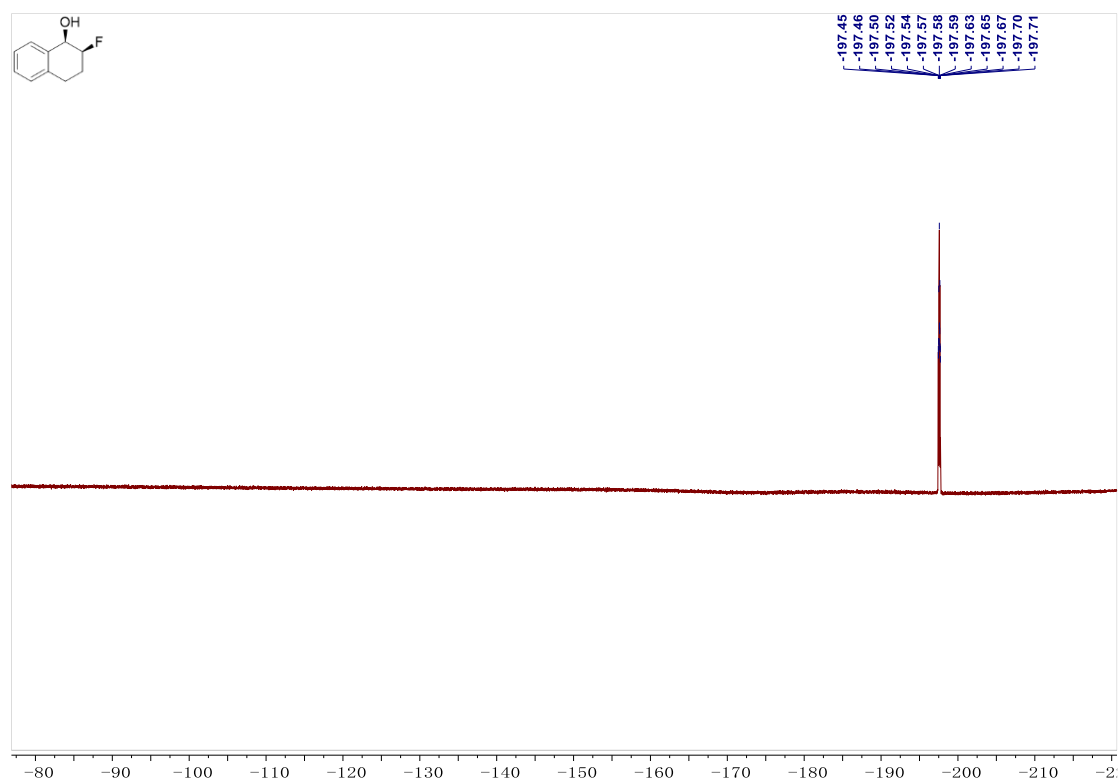

<sup>1</sup>H NMR (400 MHz, CDCl<sub>3</sub>) of compound **21**

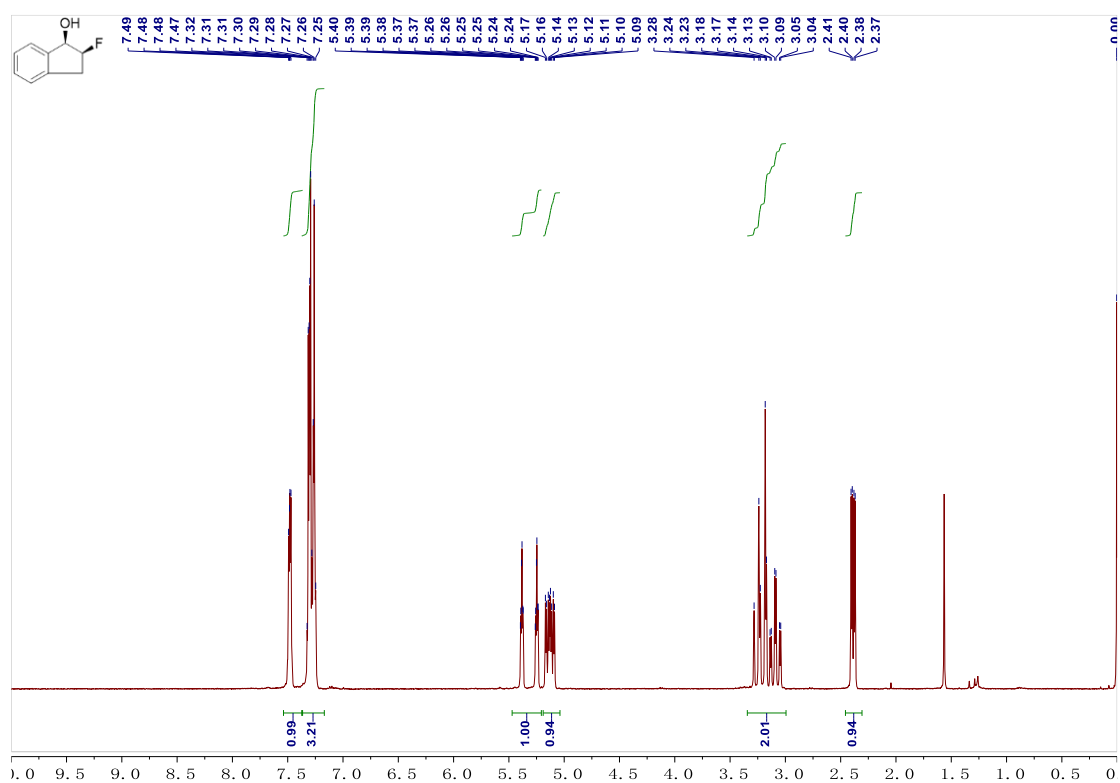

<sup>19</sup>F NMR (400 MHz, CDCl<sub>3</sub>) of compound **21**

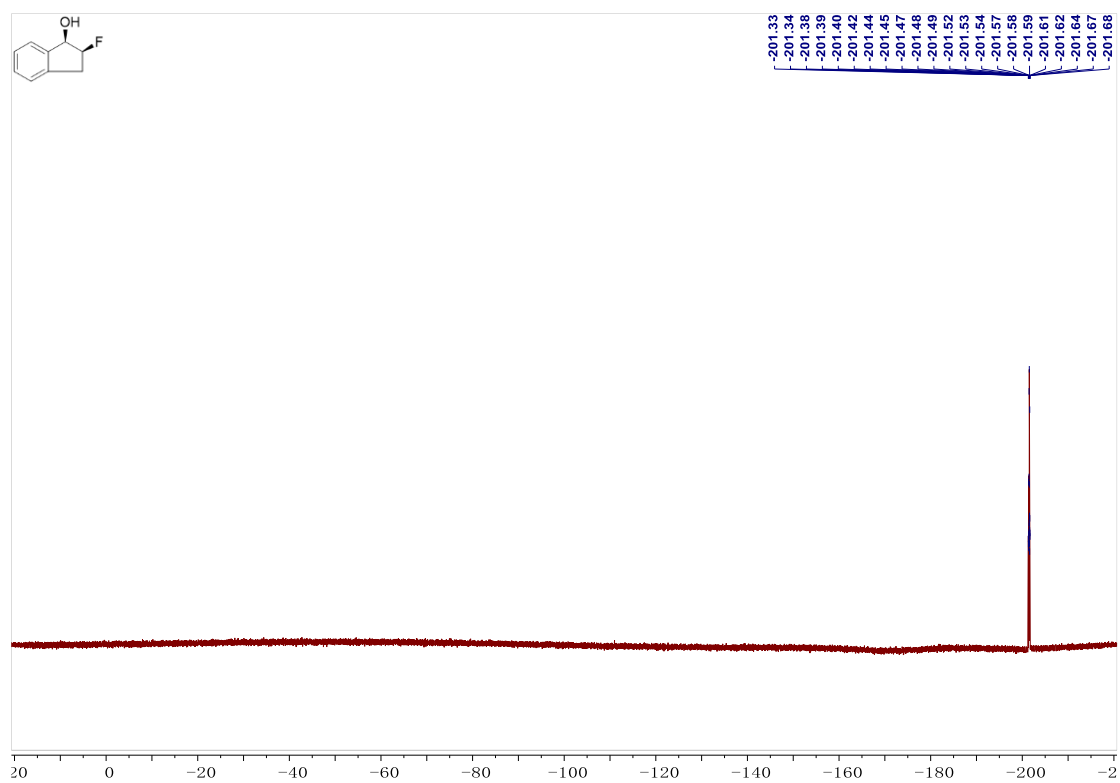

$^1\text{H}$  NMR (400 MHz,  $\text{CDCl}_3$ ) of compound **2m**

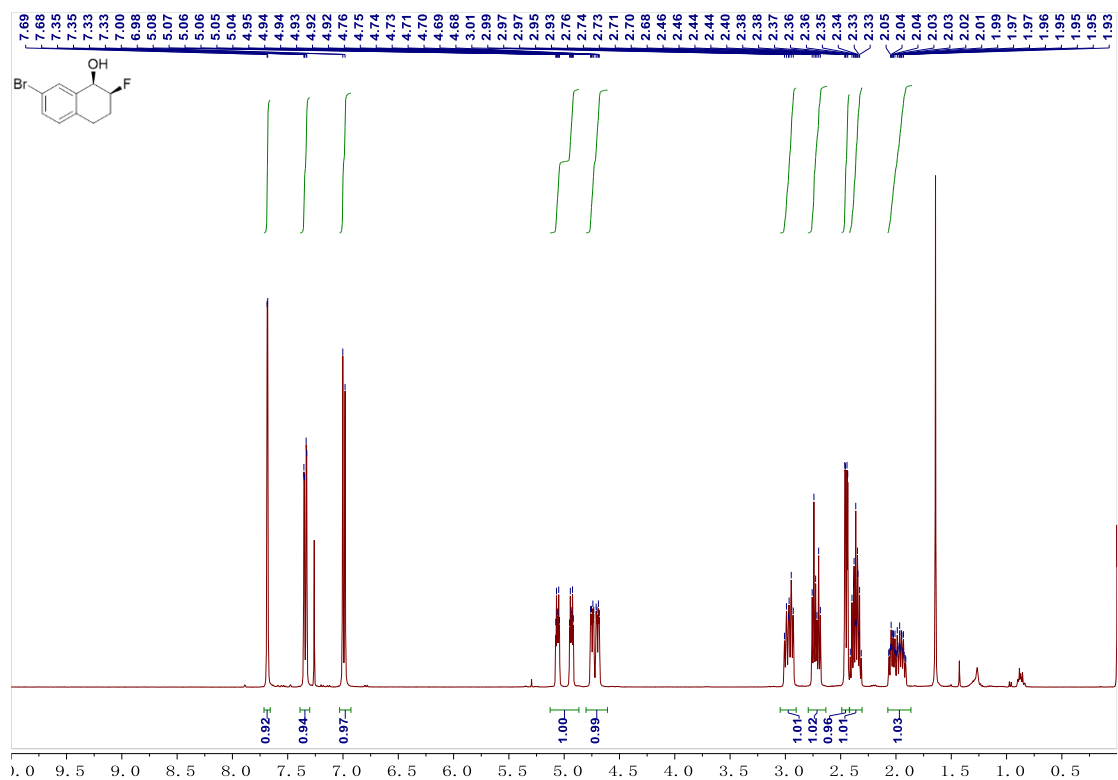

$^{13}\text{C}$  NMR (100 MHz,  $\text{CDCl}_3$ ) of compound **2m**

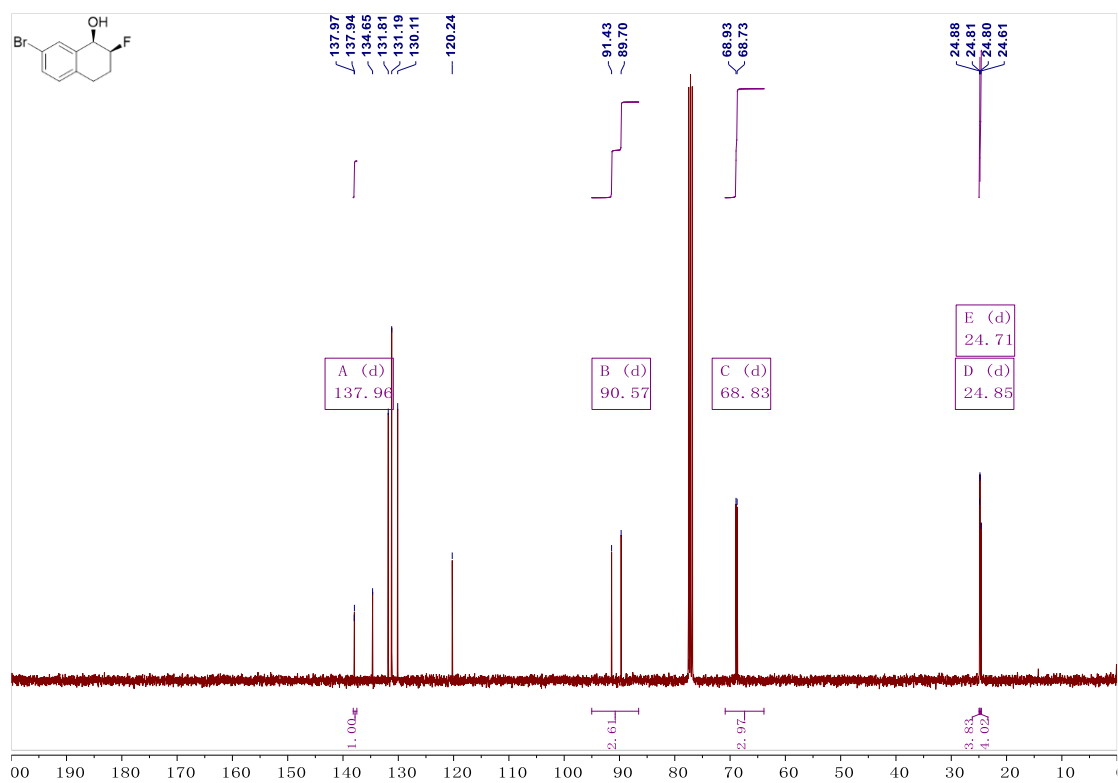

$^{19}\text{F}$  NMR (400 MHz,  $\text{CDCl}_3$ ) of compound **2m**

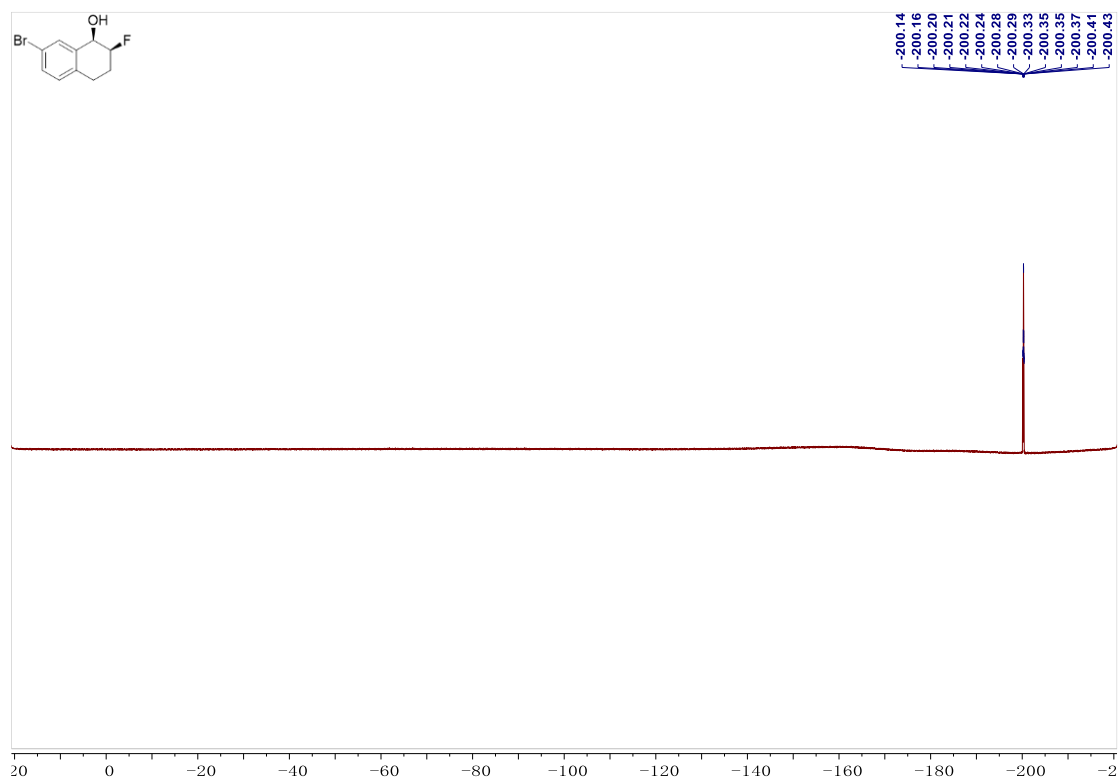

$^1\text{H}$  NMR (400 MHz,  $\text{CDCl}_3$ ) of compound **2n**

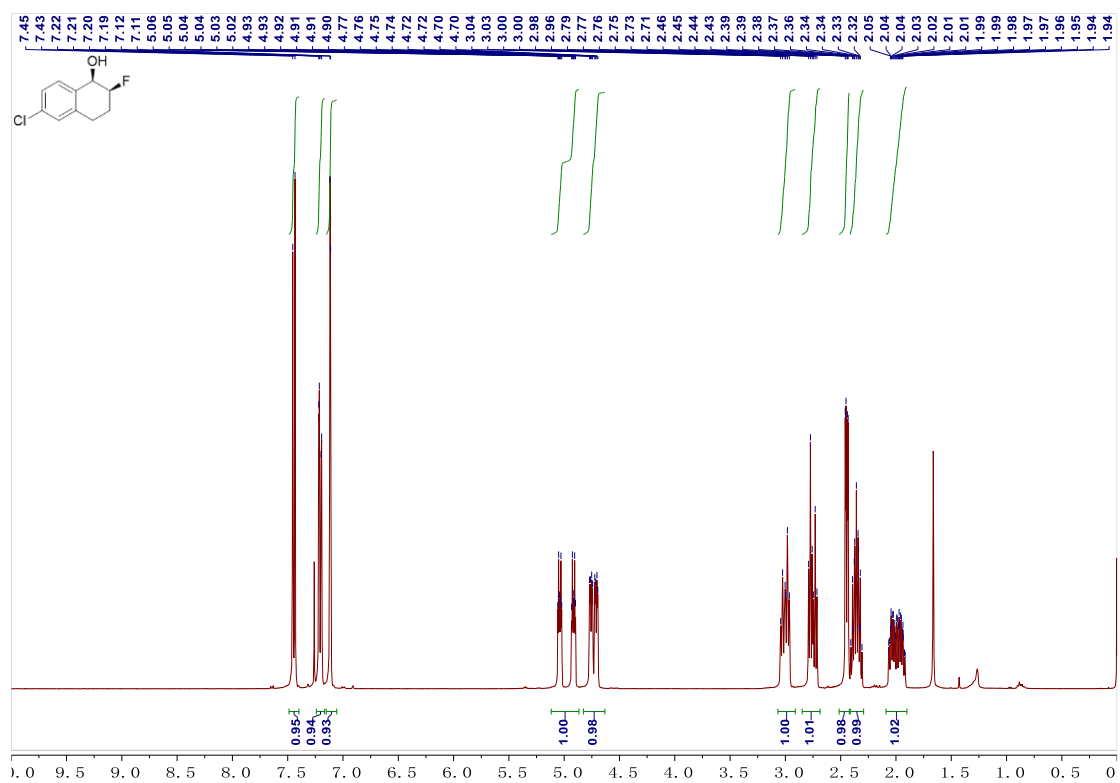

$^{13}\text{C}$  NMR (100 MHz,  $\text{CDCl}_3$ ) of compound **2n**

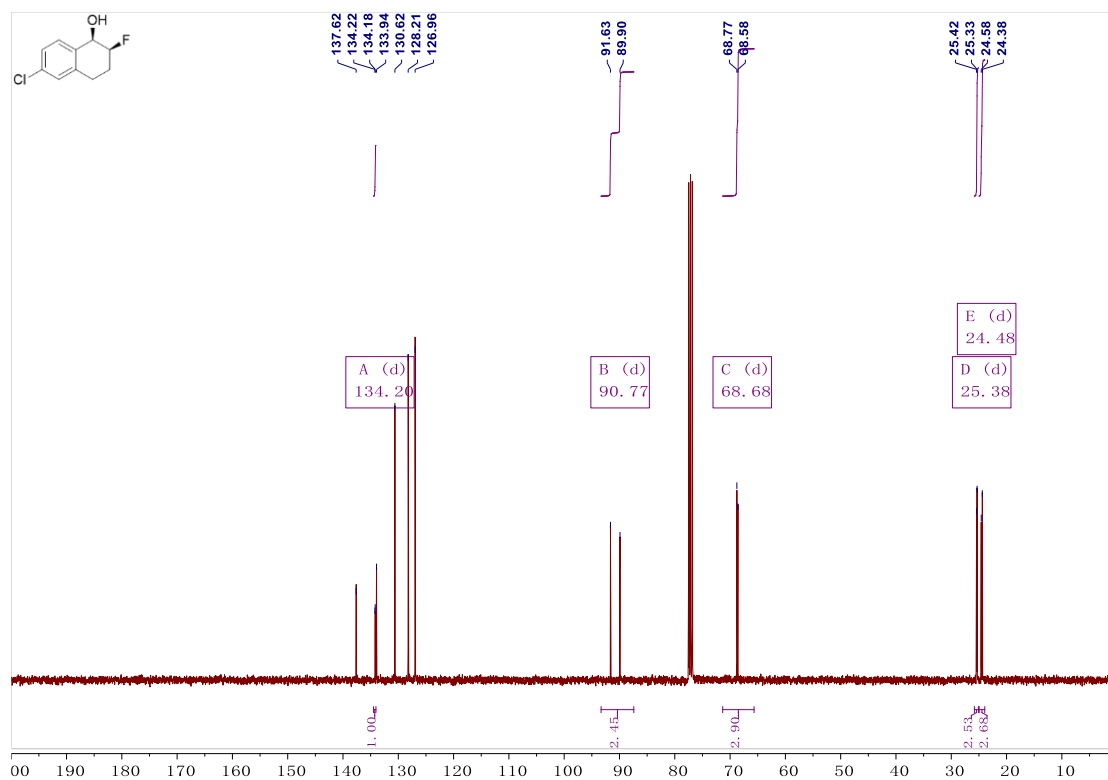

$^{19}\text{F}$  NMR (400 MHz,  $\text{CDCl}_3$ ) of compound **2n**

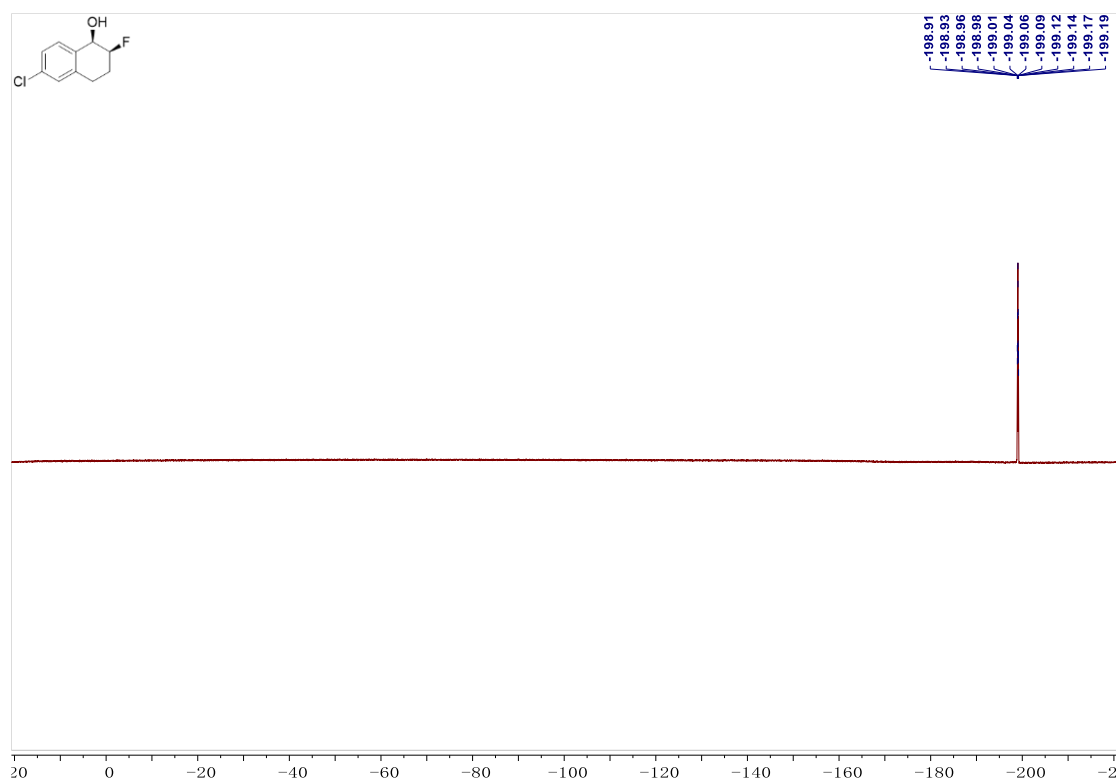

<sup>1</sup>H NMR (400 MHz, CDCl<sub>3</sub>) of compound **2o**

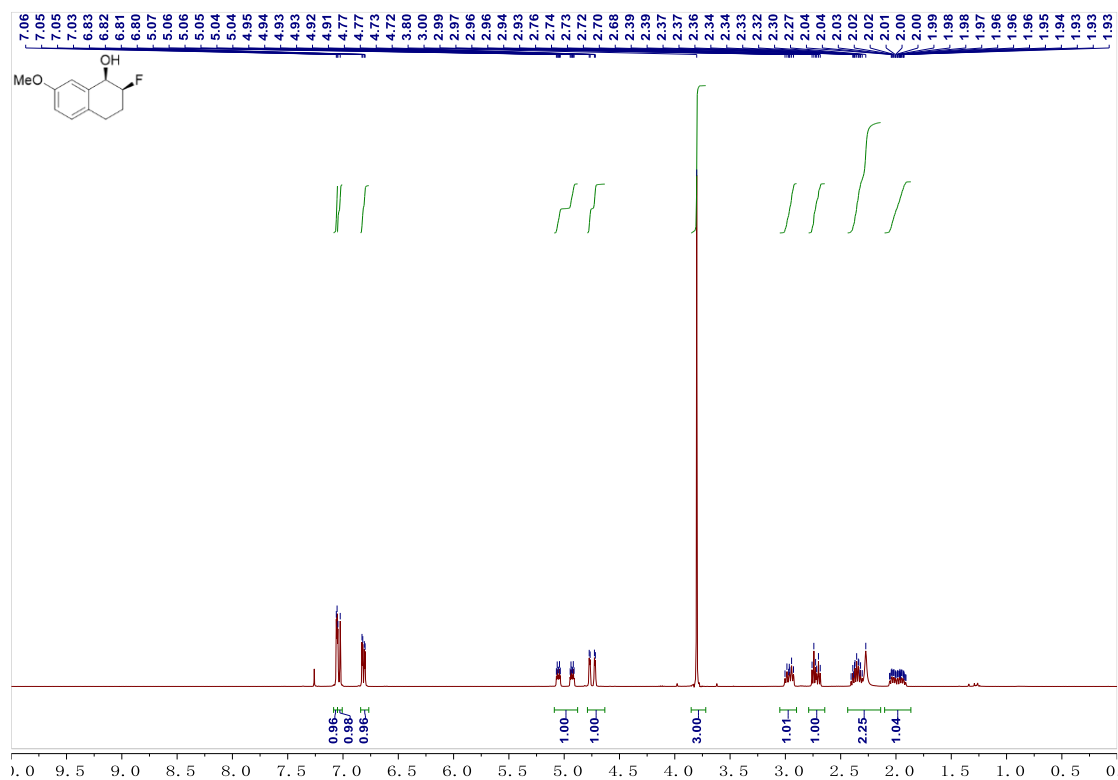

<sup>19</sup>F NMR (400 MHz, CDCl<sub>3</sub>) of compound **2o**

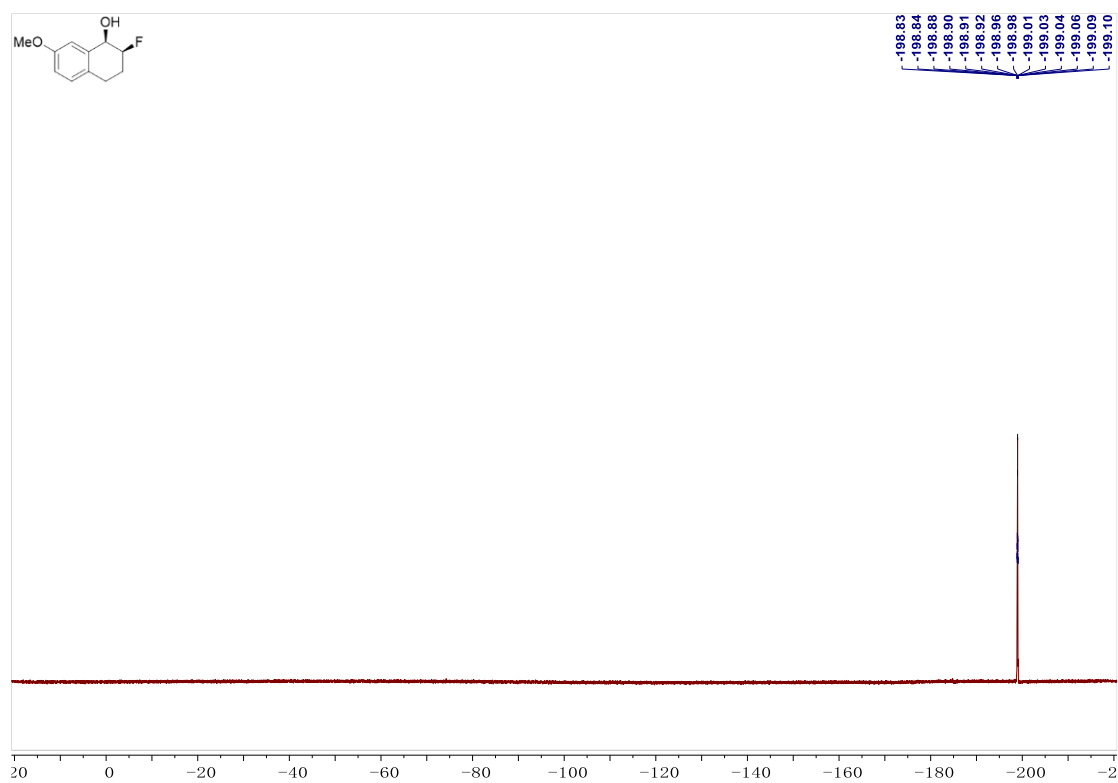

$^1\text{H}$  NMR (400 MHz,  $\text{CDCl}_3$ ) of compound **2p**

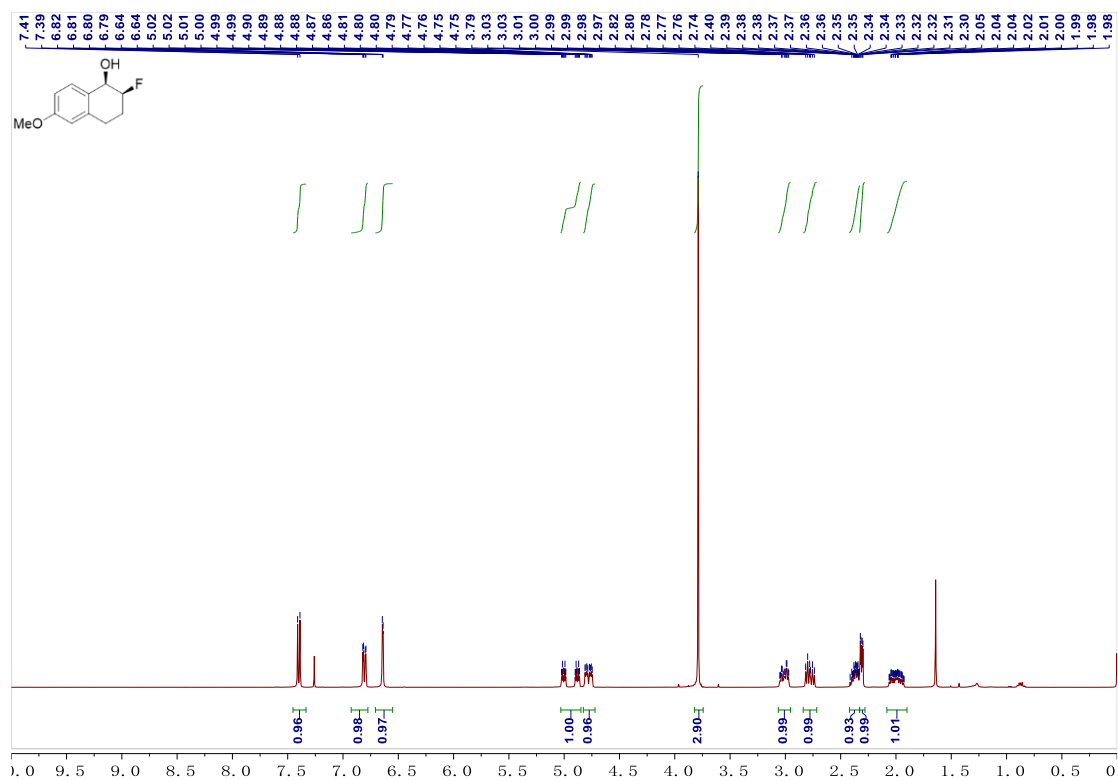

$^{13}\text{C}$  NMR (100 MHz,  $\text{CDCl}_3$ ) of compound **2p**

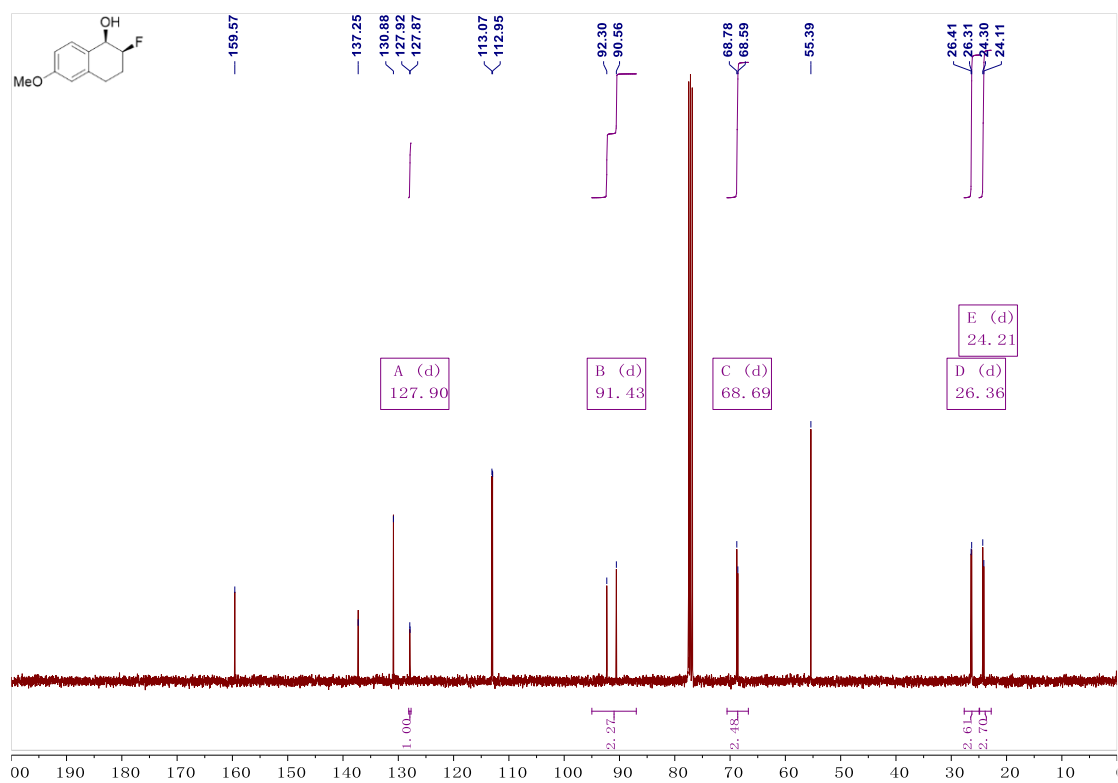

$^{19}\text{F}$  NMR (400 MHz,  $\text{CDCl}_3$ ) of compound **2p**

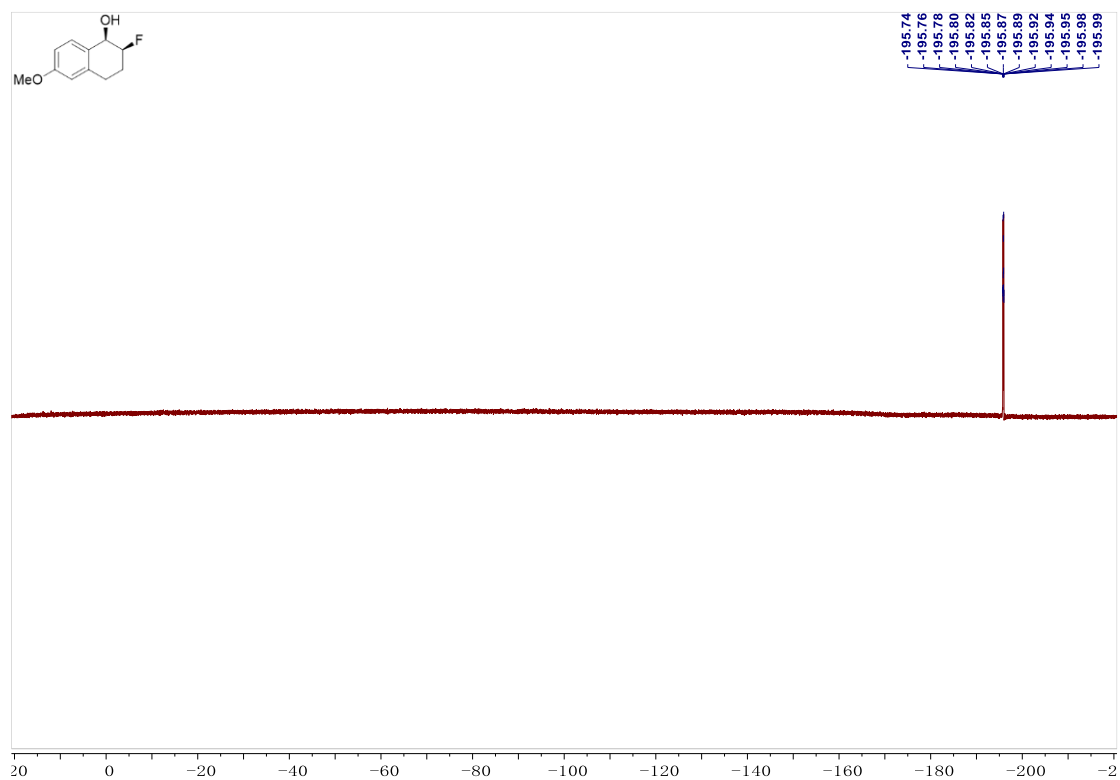

$^1\text{H}$  NMR (400 MHz,  $\text{CDCl}_3$ ) of compound **2q**

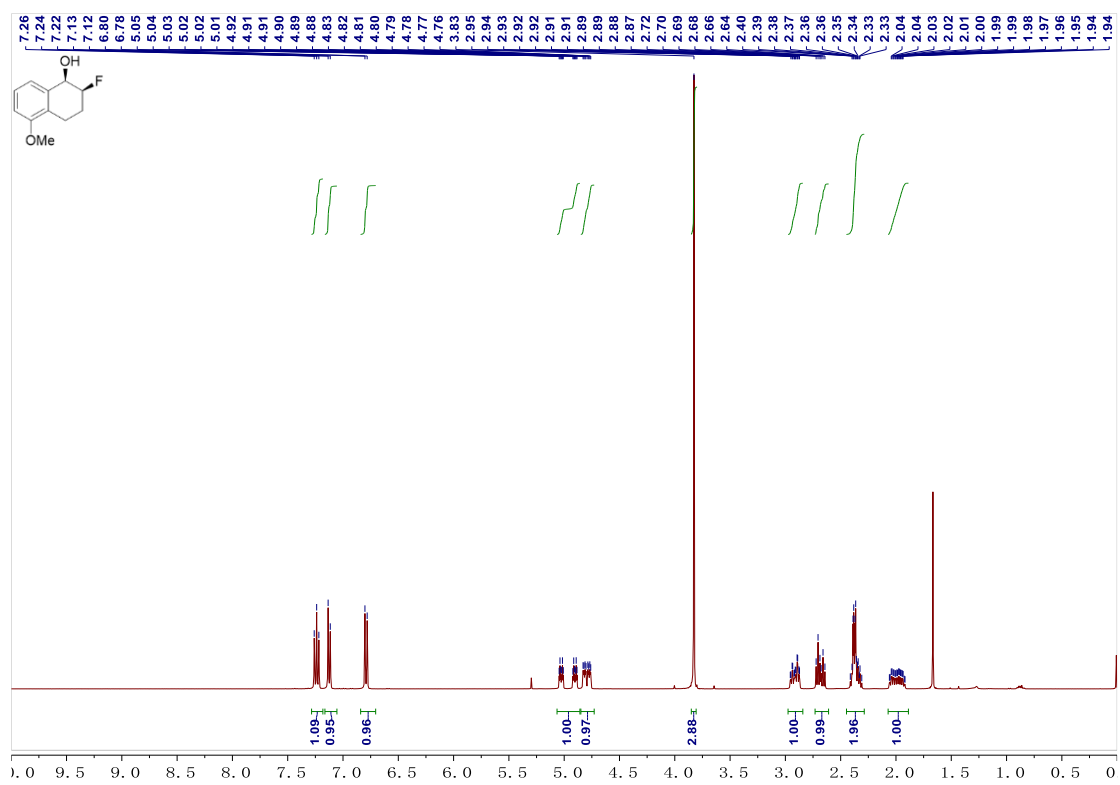



<sup>13</sup>C NMR (100 MHz, CDCl<sub>3</sub>) of compound **2q**

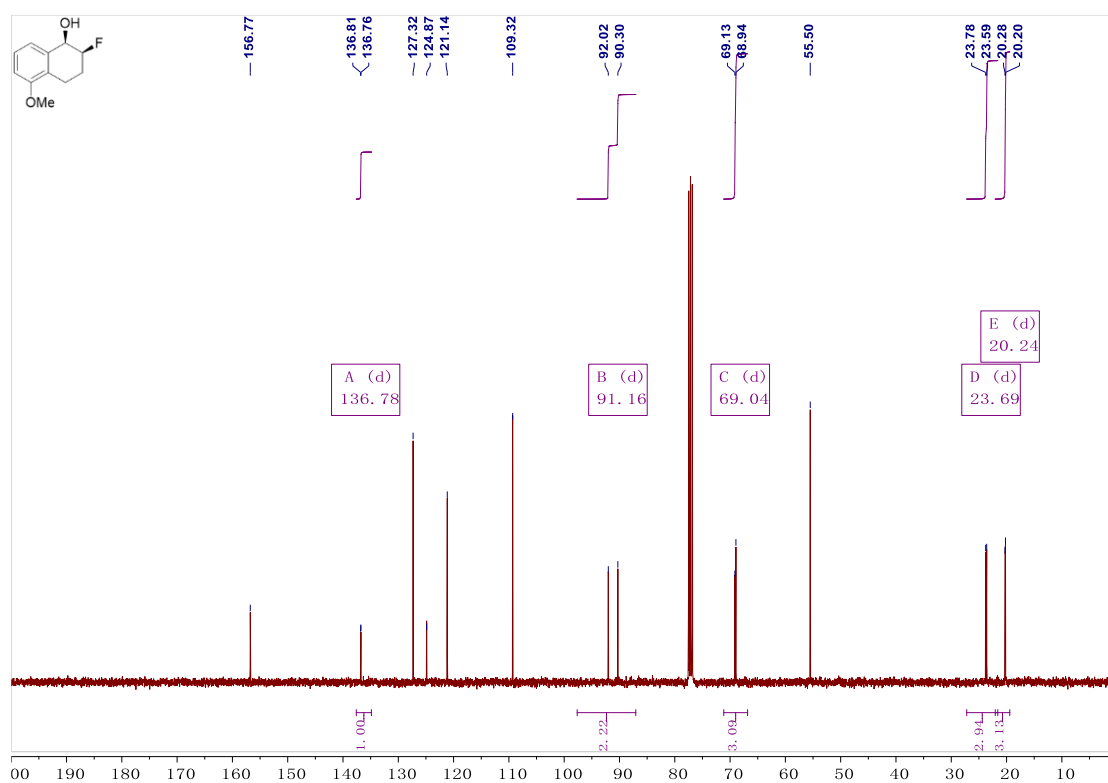

<sup>19</sup>F NMR (400 MHz, CDCl<sub>3</sub>) of compound **2q**

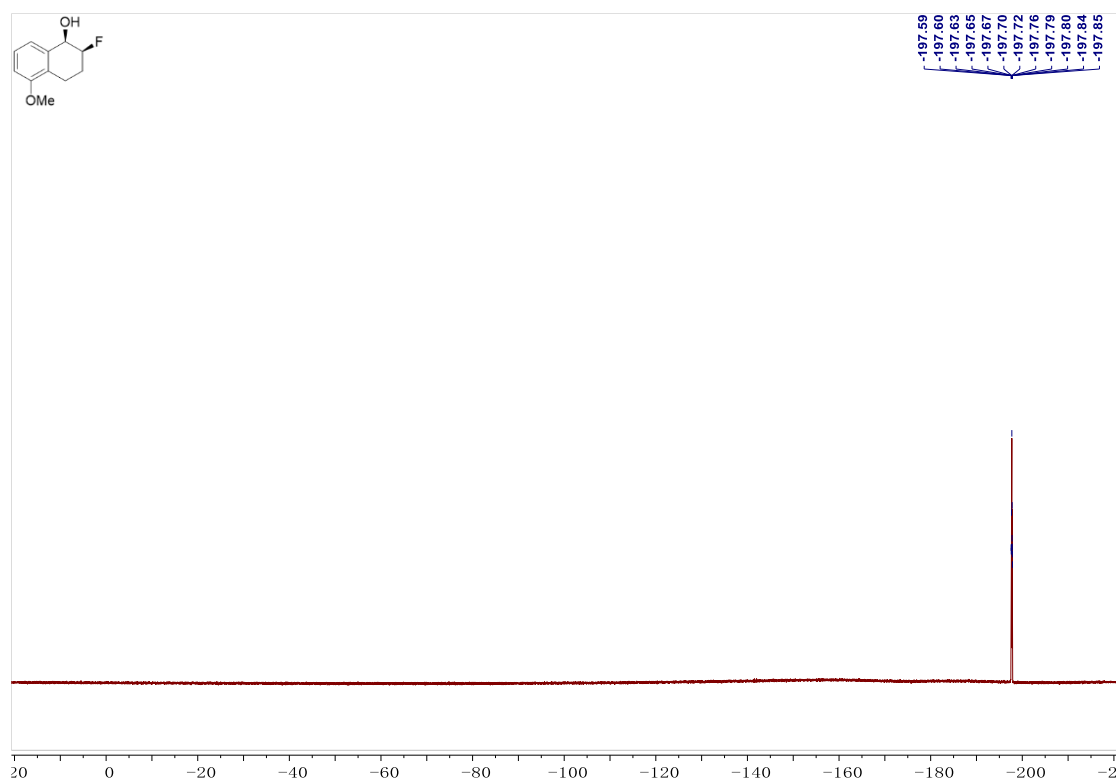

$^1\text{H}$  NMR (400 MHz,  $\text{CDCl}_3$ ) of compound **2r**

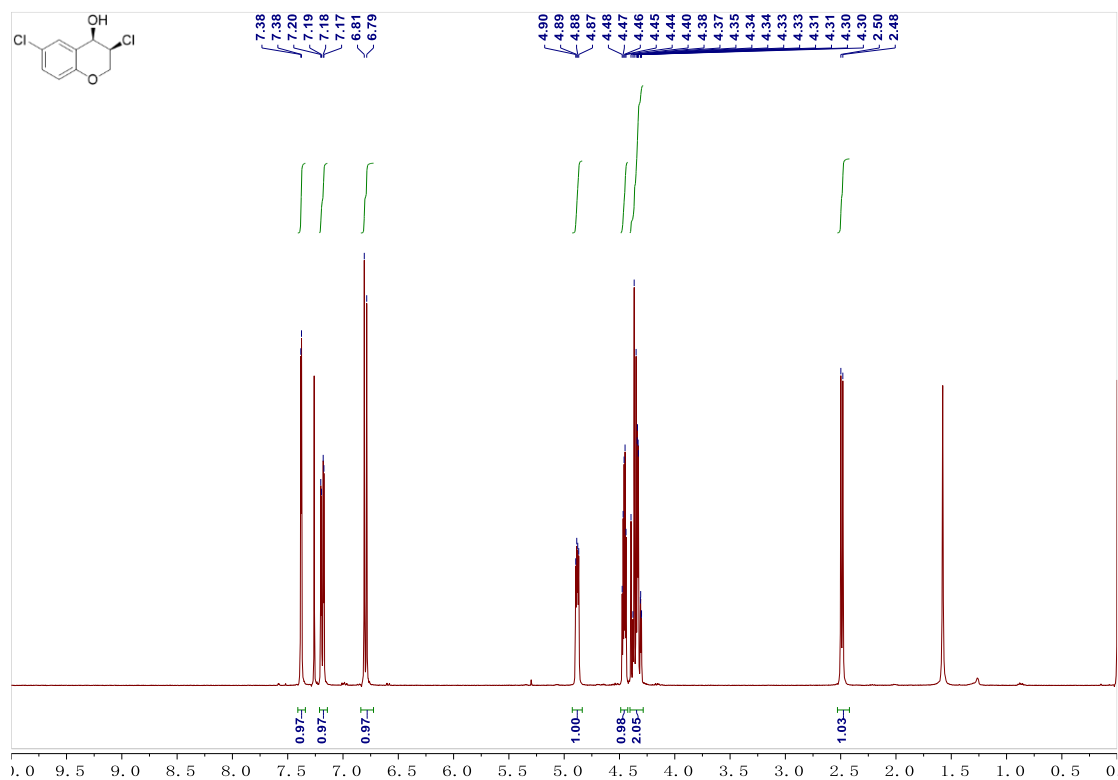

$^{13}\text{C}$  NMR (100 MHz,  $\text{CDCl}_3$ ) of compound **2r**

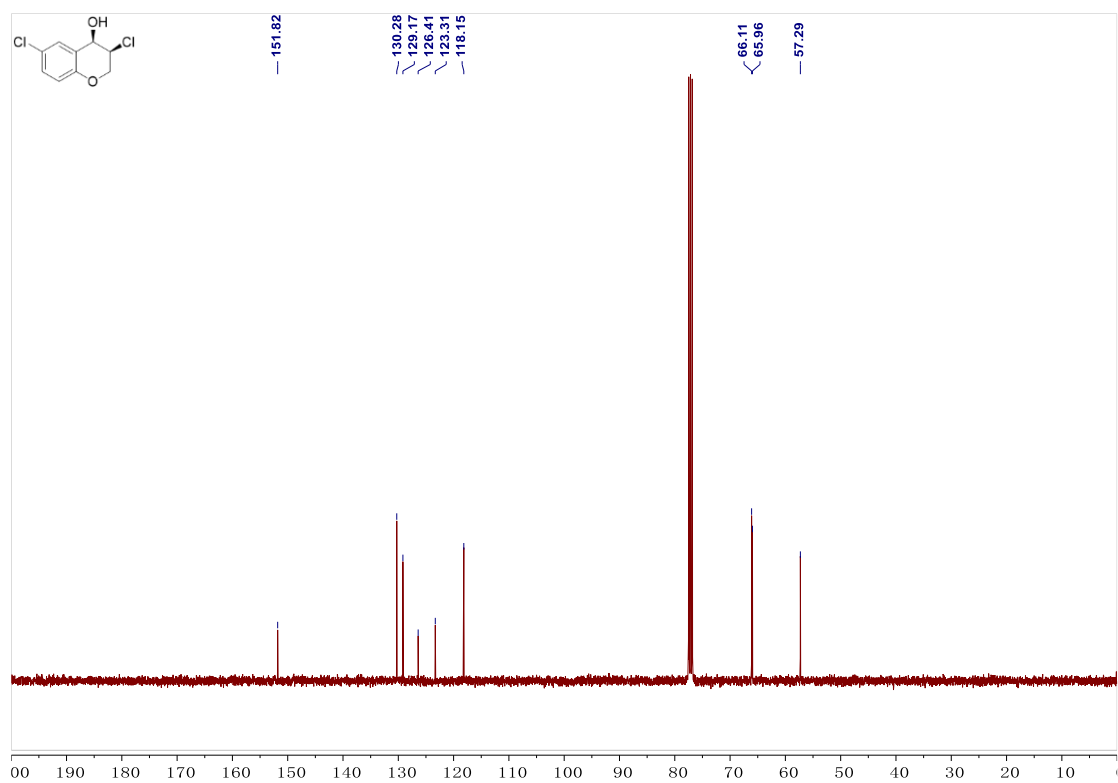

<sup>1</sup>H NMR (400 MHz, CDCl<sub>3</sub>) of compound 2s

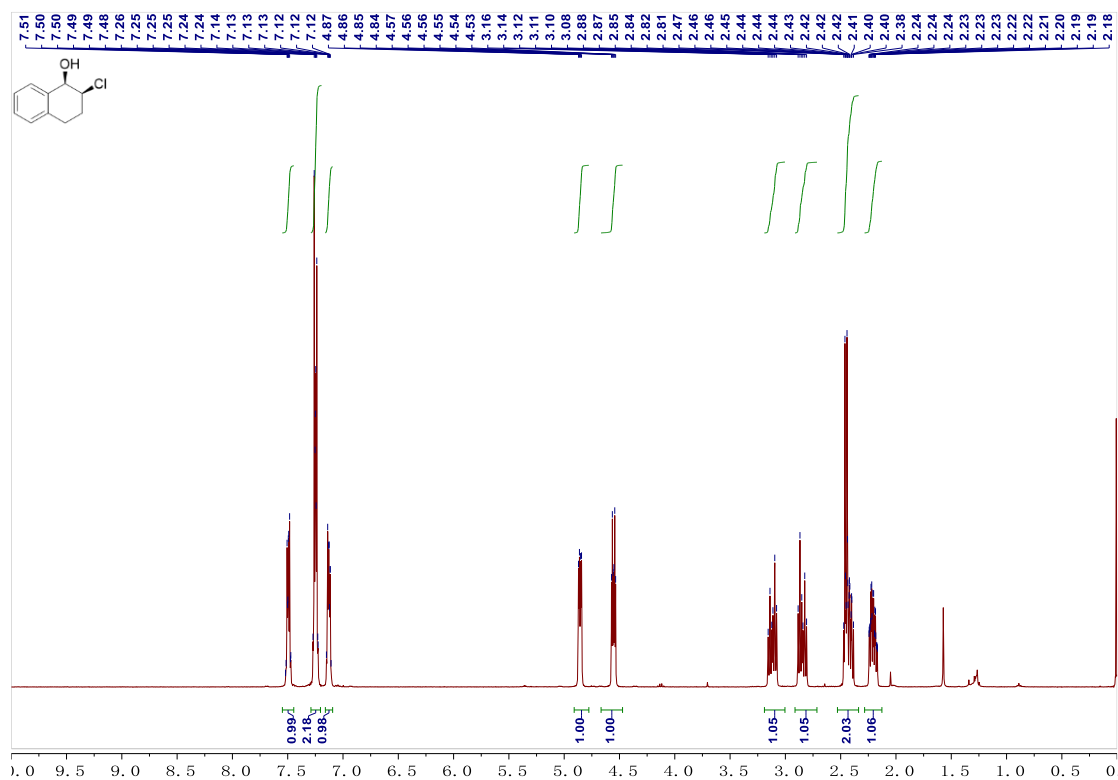

<sup>1</sup>H NMR (400 MHz, CDCl<sub>3</sub>) of compound 2t

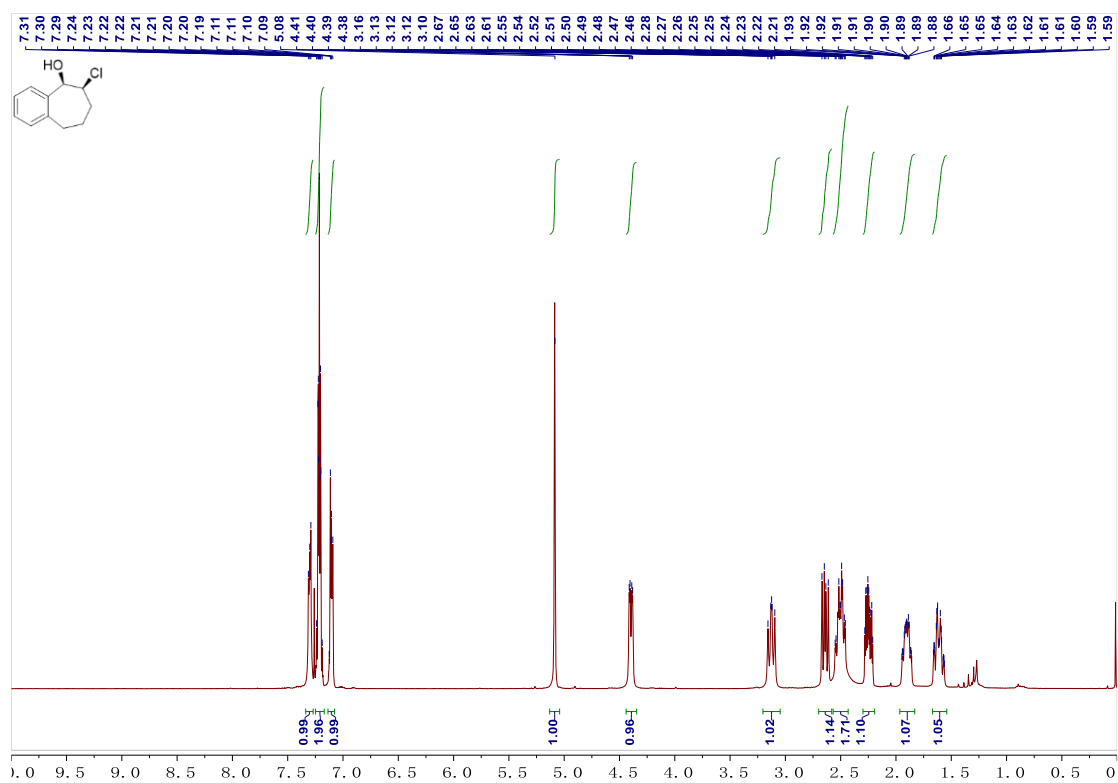

$^1\text{H}$  NMR (400 MHz,  $\text{CDCl}_3$ ) of compound **2u**

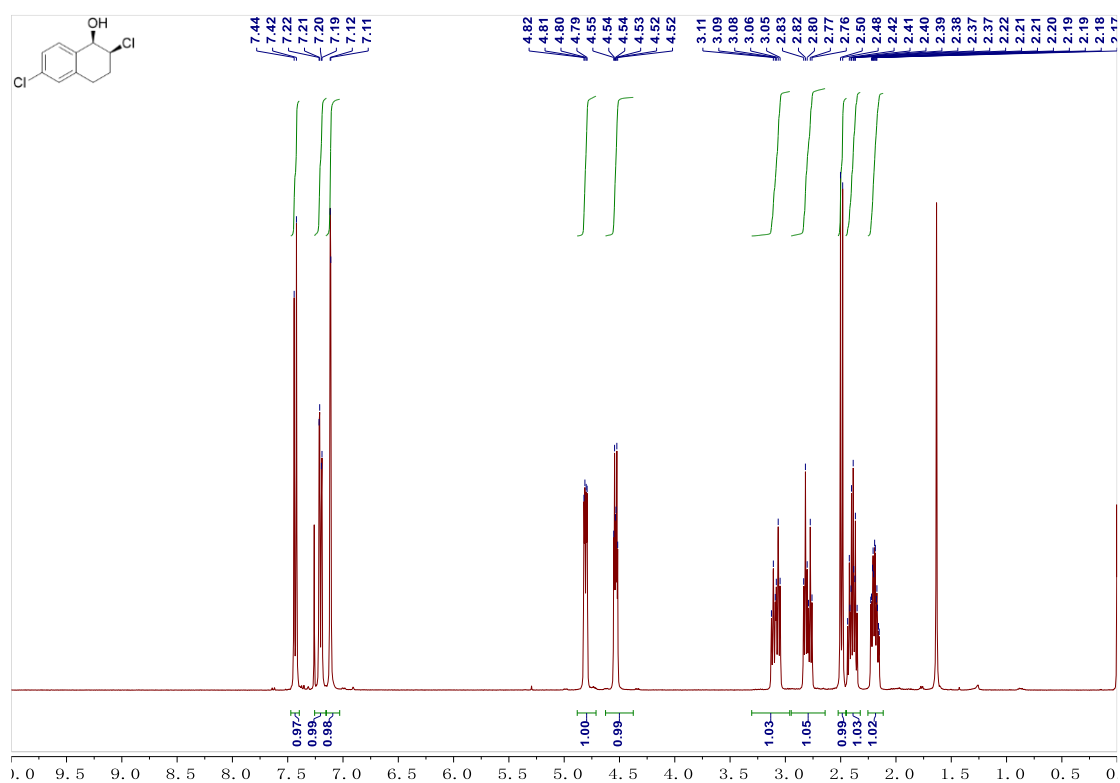

$^1\text{H}$  NMR (400 MHz,  $\text{CDCl}_3$ ) of compound **2v**

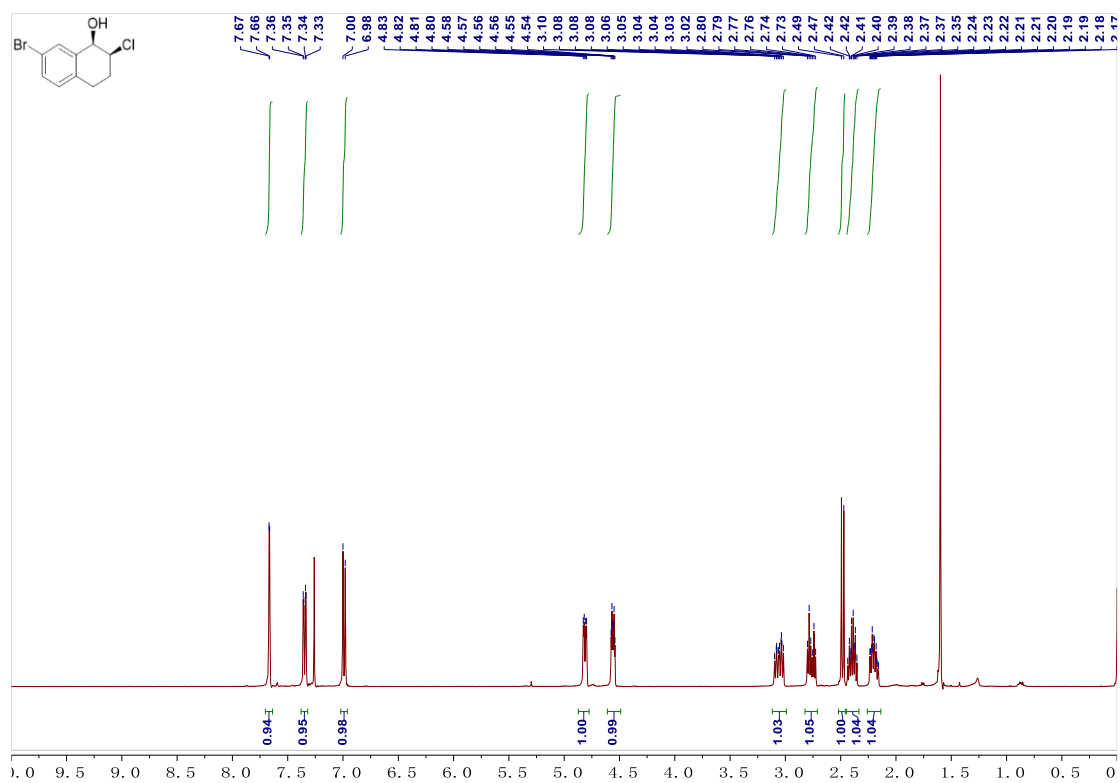

$^1\text{H}$  NMR (400 MHz,  $\text{CDCl}_3$ ) of compound **2w**

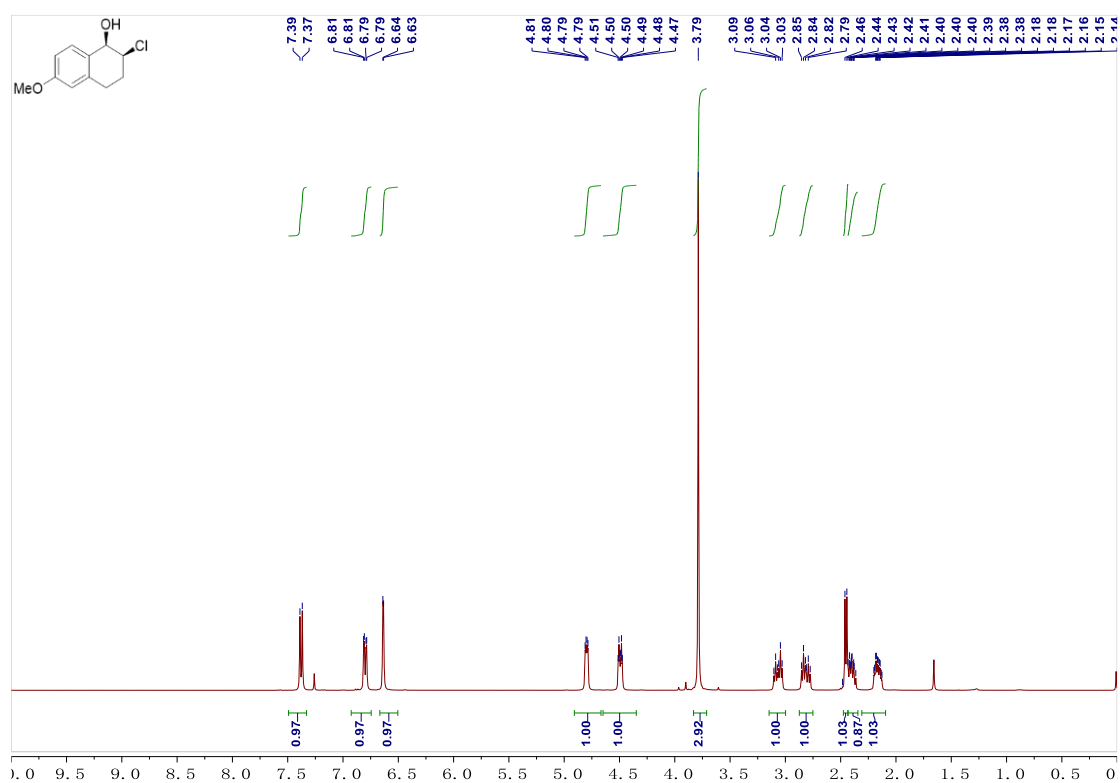

$^1\text{H}$  NMR (400 MHz,  $\text{CDCl}_3$ ) of compound **2x**

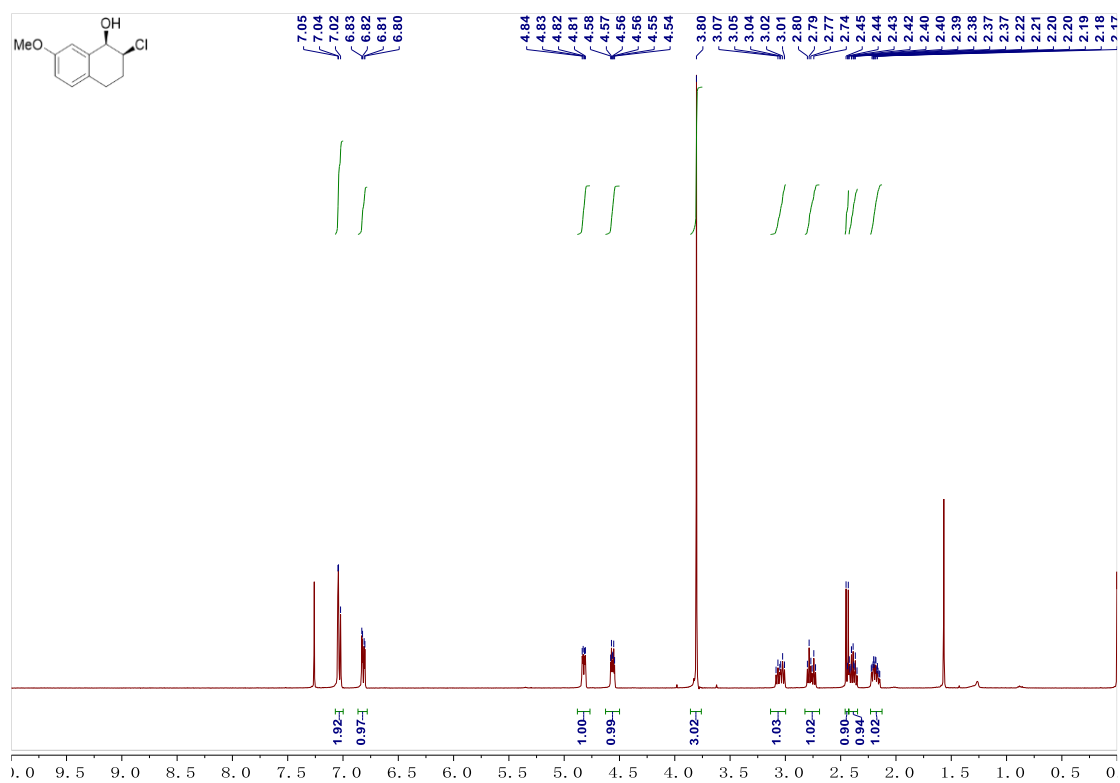

$^1\text{H}$  NMR (400 MHz,  $\text{CDCl}_3$ ) of compound **2y**

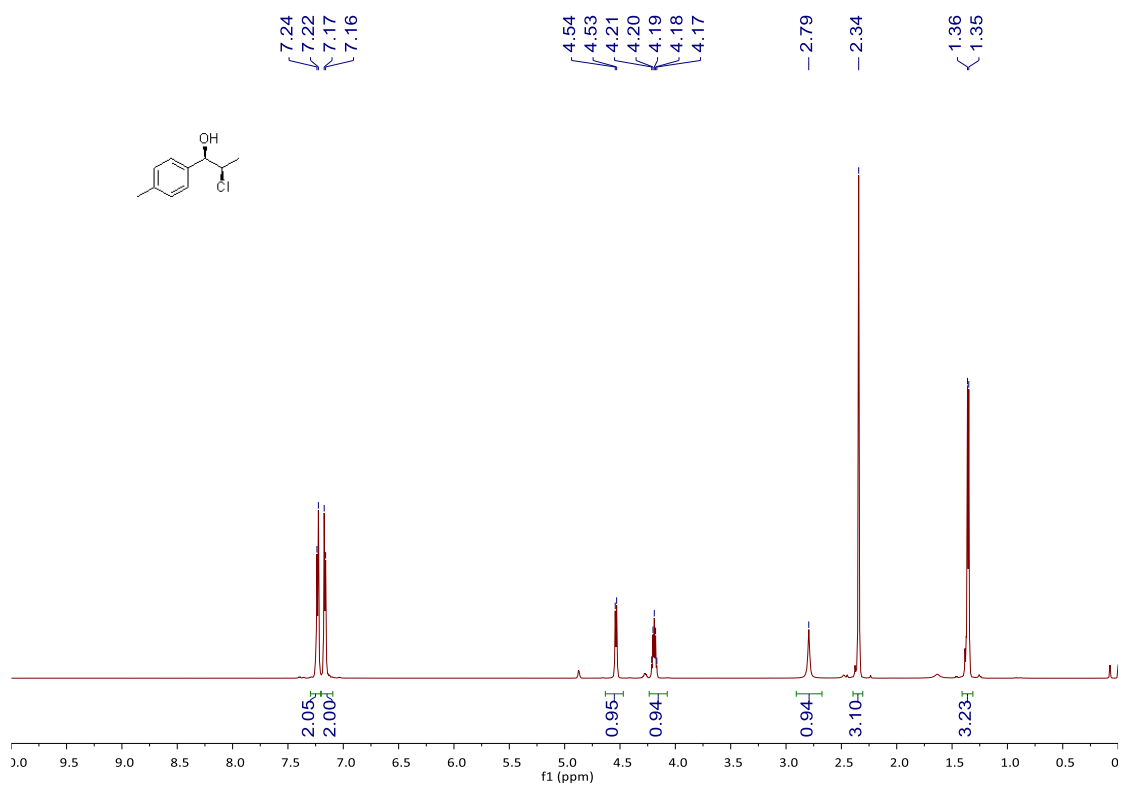

## 6. HPLC chromatograms

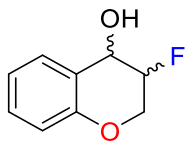

```

=====
Acq. Operator   : SYSTEM                      Seq. Line :    3
Sample Operator : SYSTEM
Acq. Instrument : LC                        Location  : P1-F-05
Injection Date  : 4/28/2022 3:12:47 PM      Inj       :    1
                                           Inj Volume: 1.000 µl

Acq. Method     : D:\ChemStation\1\Data\hb6\HB0505 2022-04-28 14-36-01\hb6_IF-3-90-10-1ML-
                  13min.M
Last changed    : 4/28/2022 2:53:43 PM by SYSTEM
Analysis Method : D:\ChemStation\1\Data\hb6\HB0505 2022-04-28 14-36-01\hb6_IF-3-90-10-1ML-
                  13min.M (Sequence Method)
Last changed    : 4/28/2022 3:34:10 PM by SYSTEM
Additional Info  : Peak(s) manually integrated
    
```

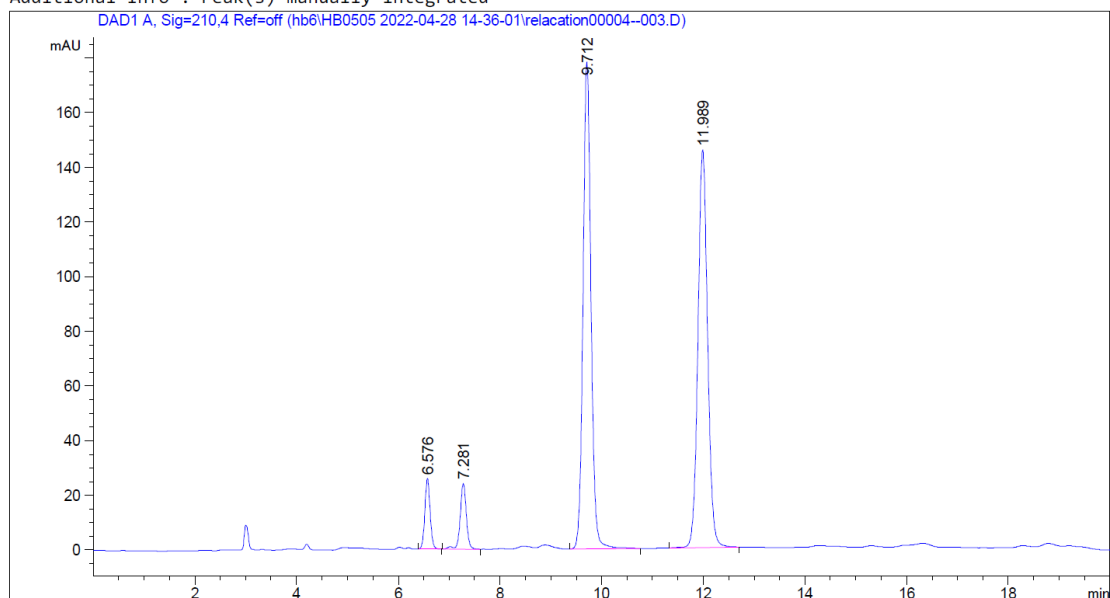

### Area Percent Report

```

Sorted By      :      Signal
Multiplier     :      1.0000
Dilution       :      1.0000
Use Multiplier & Dilution Factor with ISTDs
    
```

Signal 1: DAD1 A, Sig=210,4 Ref=off

| Peak # | RetTime [min] | Type | Width [min] | Area [mAU*s] | Height [mAU] | Area %  |
|--------|---------------|------|-------------|--------------|--------------|---------|
| 1      | 6.576         | BB   | 0.1101      | 185.82097    | 25.78374     | 4.3882  |
| 2      | 7.281         | VB R | 0.1313      | 204.27399    | 23.99939     | 4.8240  |
| 3      | 9.712         | BB   | 0.1664      | 1931.38953   | 178.29167    | 45.6103 |
| 4      | 11.989        | BB   | 0.2036      | 1913.06653   | 145.33151    | 45.1776 |

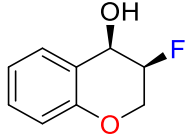

**2a**

```

=====
Acq. Operator   : SYSTEM                      Seq. Line :    2
Sample Operator : SYSTEM
Acq. Instrument : LC                        Location  : P1-F-04
Injection Date  : 4/28/2022 2:51:53 PM      Inj       :    1
                                           Inj Volume: 1.000 µl
Acq. Method     : D:\ChemStation\1\Data\hb6\HB0505 2022-04-28 14-36-01\hb6_IF-3-90-10-1ML-
                                           13min.M
Last changed    : 4/28/2022 2:53:43 PM by SYSTEM
                                           (modified after loading)
Analysis Method : D:\ChemStation\1\Data\hb6\HB0505 2022-04-28 14-36-01\hb6_IF-3-90-10-1ML-
                                           13min.M (Sequence Method)
Last changed    : 4/28/2022 3:31:17 PM by SYSTEM
                                           (modified after loading)
Additional Info  : Peak(s) manually integrated
  
```

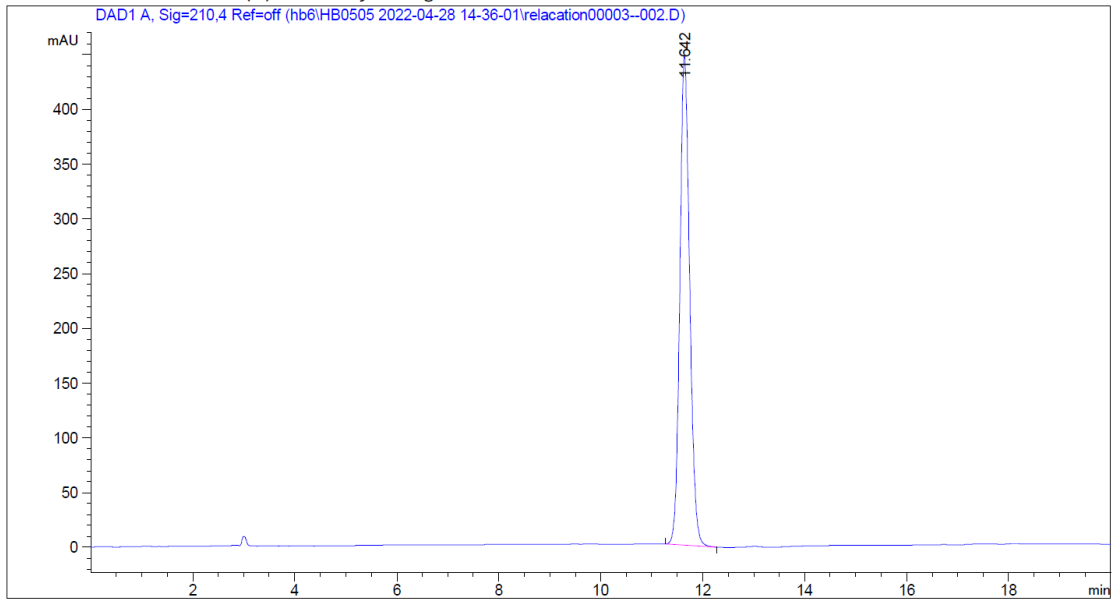

=====  
 Area Percent Report  
 =====

```

Sorted By      : Signal
Multiplier     : 1.0000
Dilution       : 1.0000
Use Multiplier & Dilution Factor with ISTDs
  
```

Signal 1: DAD1 A, Sig=210,4 Ref=off

| Peak # | RetTime [min] | Type | Width [min] | Area [mAU*s] | Height [mAU] | Area %   |
|--------|---------------|------|-------------|--------------|--------------|----------|
| 1      | 11.642        | BB   | 0.2066      | 5992.00977   | 446.31683    | 100.0000 |

Totals :                                    5992.00977 446.31683



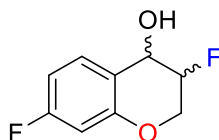

```

=====
Acq. Operator   : SYSTEM                      Seq. Line :    2
Acq. Instrument : 1290-DAD                   Location  : P1-D-01
Injection Date  : 1/21/2022 12:33:02 PM      Inj       :    1
                                           Inj Volume: 0.500 µl
Acq. Method     : d:\Chem32\1\Data\HB6\HB0454 2022-01-21 12-21-42\IE-3-90-10-0.45-0.5UL-10MIN
                                           .M
Last changed    : 1/21/2022 11:27:03 AM by SYSTEM
Analysis Method : d:\Chem32\1\Data\HB6\HB0454 2022-01-21 12-21-42\IE-3-90-10-0.45-0.5UL-10MIN
                                           .M (Sequence Method)
Last changed    : 4/15/2022 2:17:23 PM by SYSTEM
                                           (modified after loading)
Additional Info  : Peak(s) manually integrated
  
```

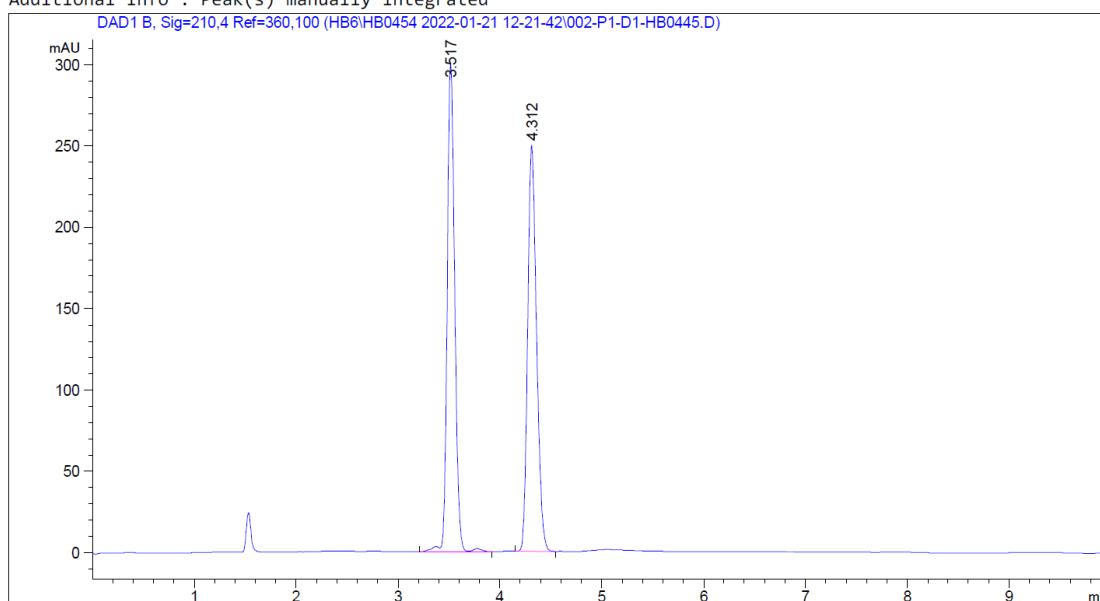

=====  
 Area Percent Report  
 =====

```

Sorted By      : Signal
Multiplier     : 1.0000
Dilution       : 1.0000
Use Multiplier & Dilution Factor with ISTDs
  
```

Signal 1: DAD1 B, Sig=210,4 Ref=360,100

| Peak # | RetTime [min] | Type | Width [min] | Area [mAU*s] | Height [mAU] | Area %  |
|--------|---------------|------|-------------|--------------|--------------|---------|
| 1      | 3.517         | VV R | 0.0786      | 1542.66687   | 300.86826    | 50.4892 |
| 2      | 4.312         | BB   | 0.0946      | 1512.77258   | 250.03011    | 49.5108 |

Totals :                    3055.43945   550.89836

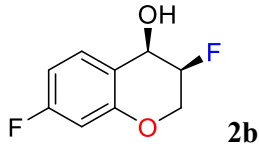

```

=====
Acq. Operator   : SYSTEM                      Seq. Line :    1
Acq. Instrument : 1290-DAD                   Location  : P1-D-02
Injection Date  : 1/21/2022 12:22:36 PM      Inj       :    1
                                           Inj Volume: 0.500 µl
Acq. Method     : d:\Chem32\1\Data\HB6\HB0454 2022-01-21 12-21-42\IE-3-90-10-0.45-0.5UL-10MIN
                                           .M
Last changed    : 1/21/2022 11:27:03 AM by SYSTEM
Analysis Method : d:\Chem32\1\Data\HB6\HB0454 2022-01-21 12-21-42\IE-3-90-10-0.45-0.5UL-10MIN
                                           .M (Sequence Method)
Last changed    : 4/15/2022 2:17:23 PM by SYSTEM
                                           (modified after loading)
Additional Info  : Peak(s) manually integrated
  
```

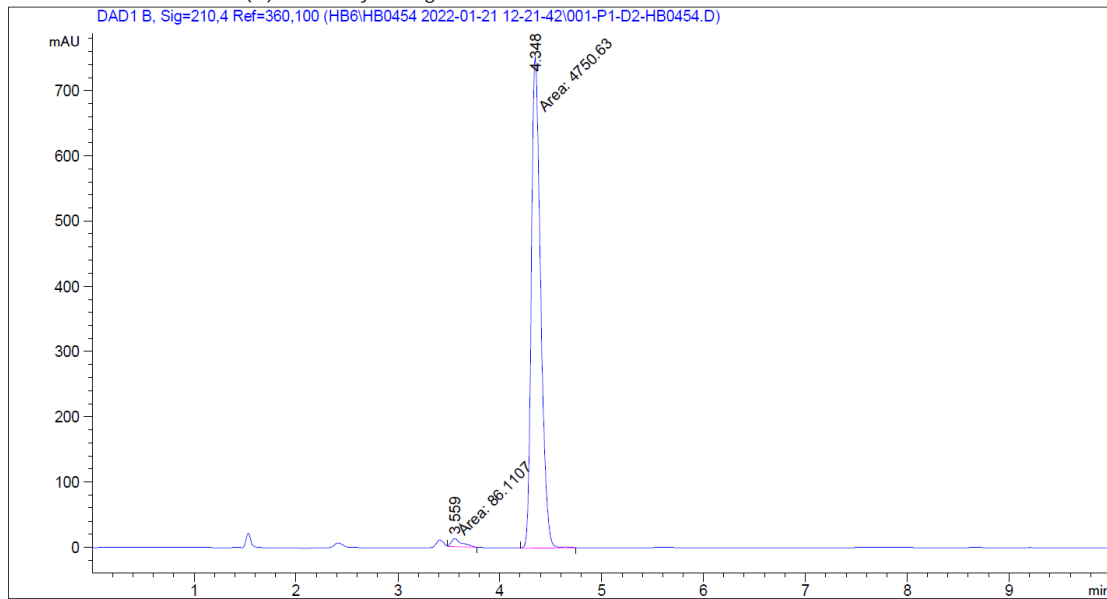

=====  
 Area Percent Report  
 =====

```

Sorted By      :      Signal
Multiplier     :      1.0000
Dilution       :      1.0000
Use Multiplier & Dilution Factor with ISTDs
  
```

Signal 1: DAD1 B, Sig=210,4 Ref=360,100

| Peak # | RetTime [min] | Type | Width [min] | Area [mAU*s] | Height [mAU] | Area %  |
|--------|---------------|------|-------------|--------------|--------------|---------|
| 1      | 3.559         | MM   | 0.1177      | 86.11067     | 12.19253     | 1.7803  |
| 2      | 4.348         | MM   | 0.1052      | 4750.62891   | 752.53674    | 98.2197 |

Totals :                    4836.73958   764.72928

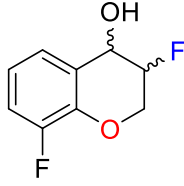

```

=====
Acq. Operator   : SYSTEM                      Seq. Line :    3
Acq. Instrument : 1290-DAD                    Location  : P1-D-03
Injection Date  : 1/16/2022 5:33:22 PM       Inj       :    1
                                           Inj Volume: 0.500 µl
Acq. Method     : d:\Chem32\1\Data\HB6\HB0448-449 2022-01-16 17-11-37\IF-3-90-10-0.5-0.5UL-
                                           10MIN.M
Last changed    : 1/16/2022 4:48:35 PM by SYSTEM
Analysis Method : d:\Chem32\1\Data\HB6\HB0448-449 2022-01-16 17-11-37\IF-3-90-10-0.5-0.5UL-
                                           10MIN.M (Sequence Method)
Last changed    : 4/15/2022 1:09:22 PM by SYSTEM
                                           (modified after loading)
Additional Info : Peak(s) manually integrated
DAD1 B, Sig=210,4 Ref=360,100 (HB6\HB0448-449 2022-01-16 17-11-37\003-P1-D3-HB0440.D)

```

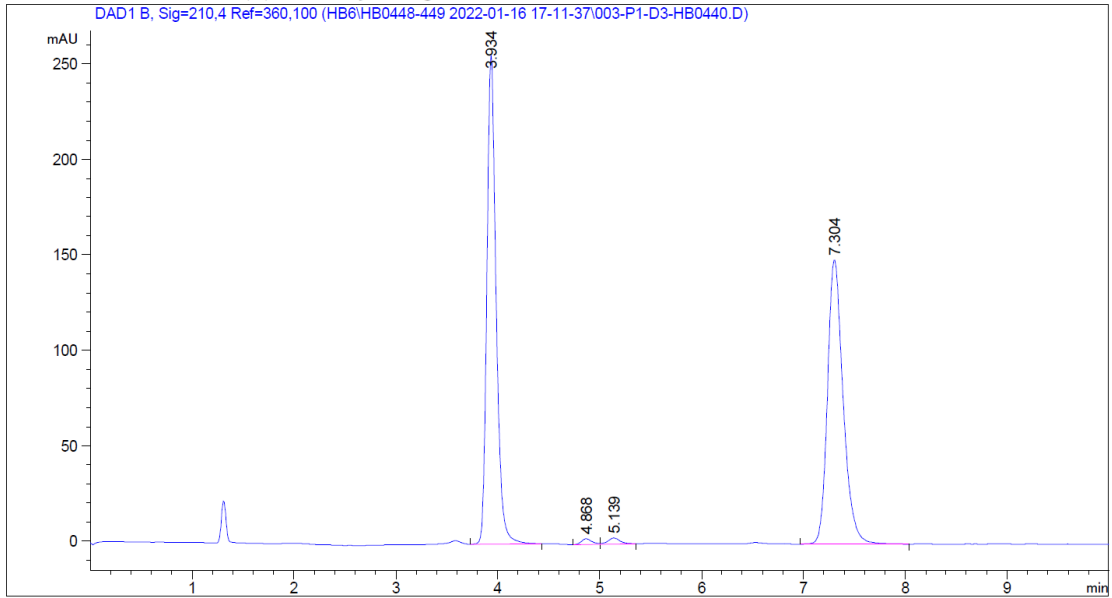

```

=====
                          Area Percent Report
=====

```

```

Sorted By      :      Signal
Multiplier     :      1.0000
Dilution      :      1.0000
Use Multiplier & Dilution Factor with ISTDs

```

Signal 1: DAD1 B, Sig=210,4 Ref=360,100

| Peak # | RetTime [min] | Type | Width [min] | Area [mAU*s] | Height [mAU] | Area %  |
|--------|---------------|------|-------------|--------------|--------------|---------|
| 1      | 3.934         | VB   | 0.0954      | 1610.66064   | 256.16379    | 49.6485 |
| 2      | 4.868         | BV   | 0.1063      | 21.01318     | 2.97911      | 0.6477  |
| 3      | 5.139         | VB   | 0.1232      | 25.90921     | 3.17523      | 0.7986  |
| 4      | 7.304         | BB   | 0.1603      | 1586.54370   | 148.95432    | 48.9051 |

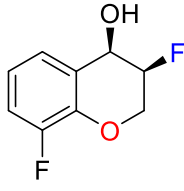

```

=====
Acq. Operator   : SYSTEM                      Seq. Line :    4
Acq. Instrument : 1290-DAD                    Location  : P1-D-04
Injection Date  : 1/16/2022 5:43:48 PM       Inj       :    1
                                           Inj Volume: 0.500 µl
Acq. Method     : d:\Chem32\1\Data\HB6\HB0448-449 2022-01-16 17-11-37\IF-3-90-10-0.5-0.5UL-
                  10MIN.M
Last changed    : 1/16/2022 4:48:35 PM by SYSTEM
Analysis Method : d:\Chem32\1\Data\HB6\HB0448-449 2022-01-16 17-11-37\IF-3-90-10-0.5-0.5UL-
                  10MIN.M (Sequence Method)
Last changed    : 4/15/2022 1:09:22 PM by SYSTEM
                  (modified after loading)
Additional Info : Peak(s) manually integrated
=====
  
```

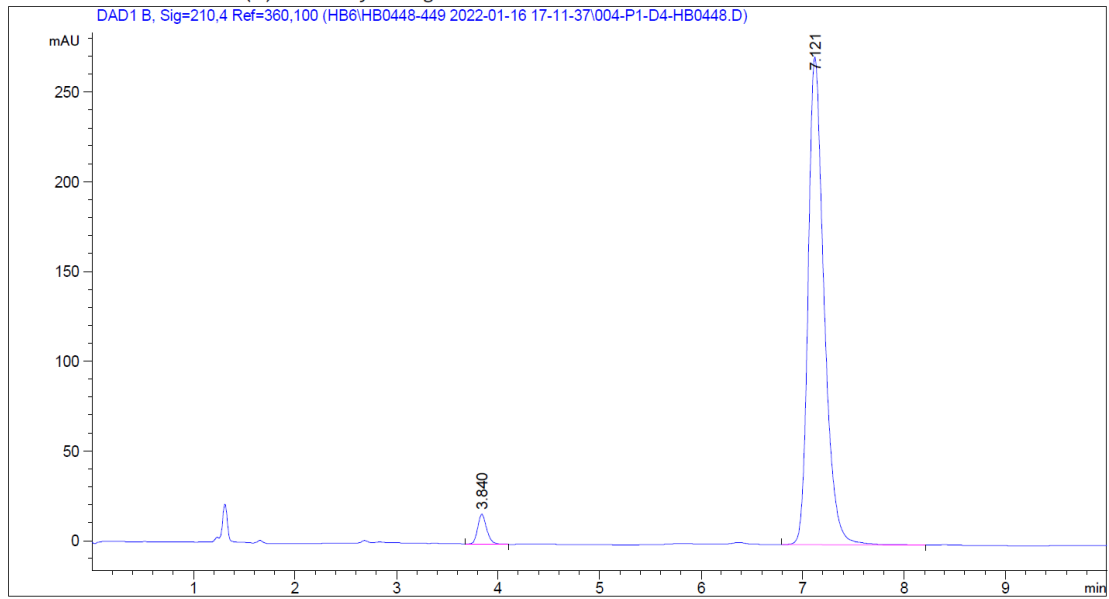

=====  
 Area Percent Report  
 =====

```

Sorted By      :      Signal
Multiplier     :      1.0000
Dilution      :      1.0000
Use Multiplier & Dilution Factor with ISTDs
  
```

Signal 1: DAD1 B, Sig=210,4 Ref=360,100

| Peak # | RetTime [min] | Type | Width [min] | Area [mAU*s] | Height [mAU] | Area %  |
|--------|---------------|------|-------------|--------------|--------------|---------|
| 1      | 3.840         | BB   | 0.0937      | 102.69276    | 16.69804     | 3.3677  |
| 2      | 7.121         | BB   | 0.1645      | 2946.64453   | 271.72641    | 96.6323 |

Totals :                                    3049.33730   288.42445

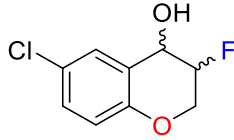

```

=====
Acq. Operator   : SYSTEM                      Seq. Line :    1
Acq. Instrument : 1290-DAD                    Location  : P1-D-01
Injection Date  : 1/16/2022 5:12:30 PM       Inj       :    1
                                           Inj Volume: 0.500 µl
Acq. Method     : d:\Chem32\1\Data\HB6\HB0448-449 2022-01-16 17-11-37\IF-3-90-10-0.5-0.5UL-
                  10MIN.M
Last changed    : 1/16/2022 4:48:35 PM by SYSTEM
Analysis Method : d:\Chem32\1\Data\HB6\HB0448-449 2022-01-16 17-11-37\IF-3-90-10-0.5-0.5UL-
                  10MIN.M (Sequence Method)
Last changed    : 4/15/2022 1:09:22 PM by SYSTEM
                  (modified after loading)
Additional Info : Peak(s) manually integrated
  
```

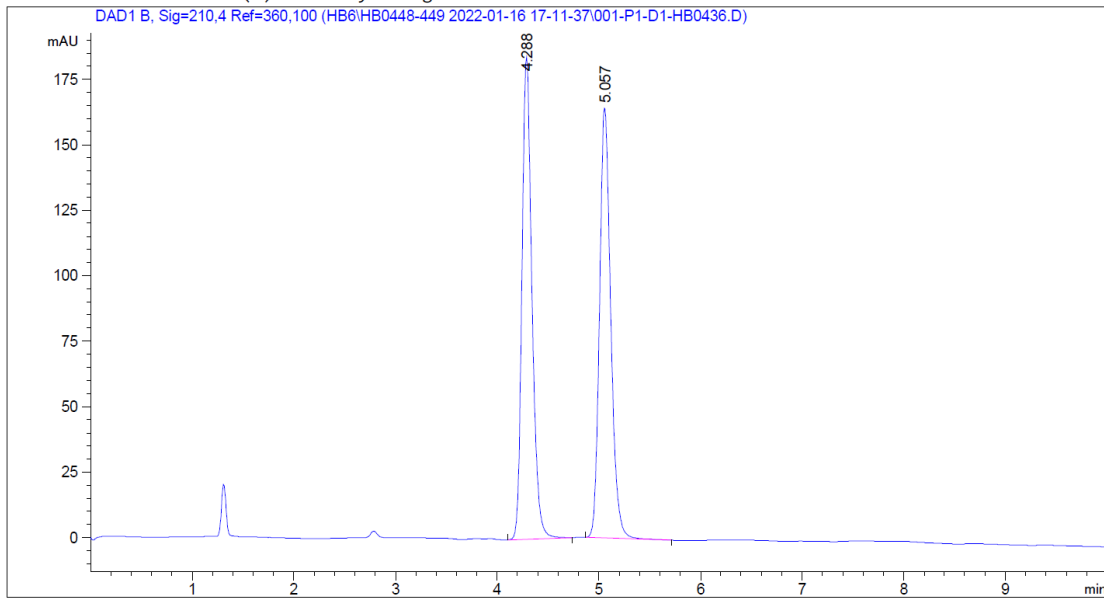

=====  
 Area Percent Report  
 =====

```

Sorted By      : Signal
Multiplier     : 1.0000
Dilution       : 1.0000
Use Multiplier & Dilution Factor with ISTDs
  
```

Signal 1: DAD1 B, Sig=210,4 Ref=360,100

| Peak # | RetTime [min] | Type | Width [min] | Area [mAU*s] | Height [mAU] | Area %  |
|--------|---------------|------|-------------|--------------|--------------|---------|
| 1      | 4.288         | BB   | 0.1057      | 1255.98950   | 183.95157    | 50.0653 |
| 2      | 5.057         | BB   | 0.1169      | 1252.71411   | 164.35622    | 49.9347 |

Totals :                    2508.70361  348.30779

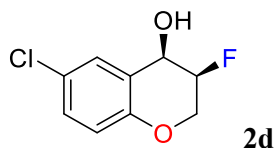

```

=====
Acq. Operator   : SYSTEM                      Seq. Line :    2
Acq. Instrument : 1290-DAD                   Location  : P1-D-02
Injection Date  : 1/16/2022 5:22:56 PM      Inj       :    1
                                           Inj Volume: 0.500 µl
Acq. Method     : d:\Chem32\1\Data\HB6\HB0448-449 2022-01-16 17-11-37\IF-3-90-10-0.5-0.5UL-
                  10MIN.M
Last changed    : 1/16/2022 4:48:35 PM by SYSTEM
Analysis Method : d:\Chem32\1\Data\HB6\HB0448-449 2022-01-16 17-11-37\IF-3-90-10-0.5-0.5UL-
                  10MIN.M (Sequence Method)
Last changed    : 4/15/2022 1:09:22 PM by SYSTEM
                  (modified after loading)
Additional Info : Peak(s) manually integrated
  
```

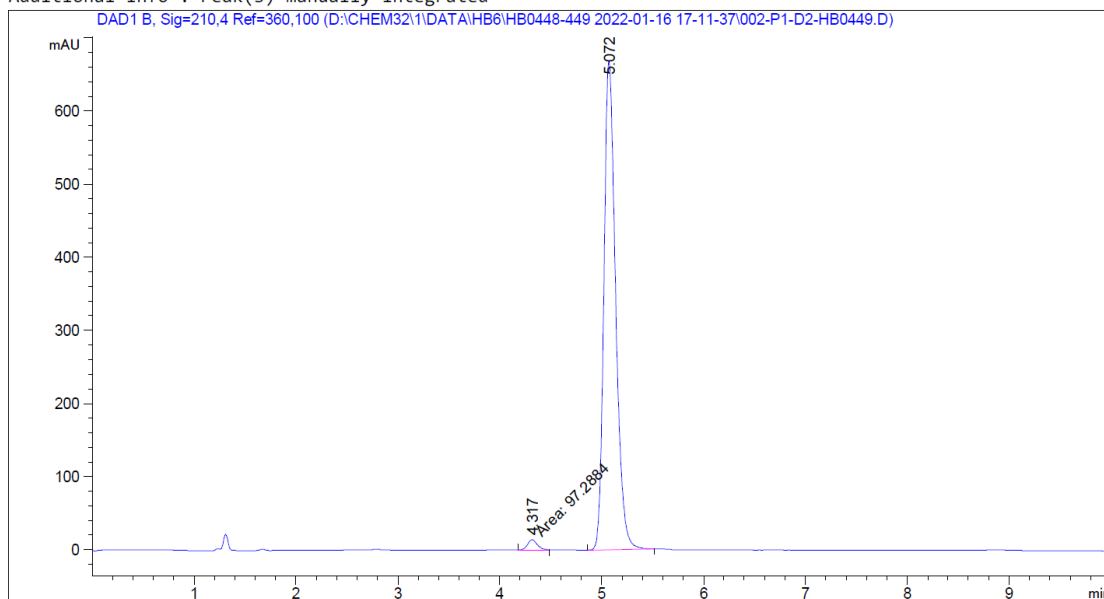

=====  
 Area Percent Report  
 =====

```

Sorted By      :      Signal
Multiplier     :      1.0000
Dilution       :      1.0000
Use Multiplier & Dilution Factor with ISTDs
  
```

Signal 1: DAD1 B, Sig=210,4 Ref=360,100

| Peak # | RetTime [min] | Type | Width [min] | Area [mAU*s] | Height [mAU] | Area %  |
|--------|---------------|------|-------------|--------------|--------------|---------|
| 1      | 4.317         | MM   | 0.1132      | 97.28838     | 14.32150     | 1.7920  |
| 2      | 5.072         | BB   | 0.1210      | 5331.71826   | 669.17145    | 98.2080 |

Totals :                                    5429.00665    683.49295

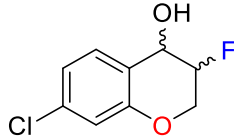

Data File D:\CHEMSTATION\1\DATA\HB6\HB0435 2022-04-16 10-22-14\relacation00001.D  
 Sample Name: HB0435

```

=====
Acq. Operator   : SYSTEM                      Seq. Line :    1
Sample Operator : SYSTEM
Acq. Instrument : LC                        Location  : P2-D-09
Injection Date  : 4/16/2022 10:23:03 AM      Inj       :    1
                                           Inj Volume: 1.000 µl
Different Inj Volume from Sample Entry! Actual Inj Volume : 0.500 µl
Acq. Method     : D:\ChemStation\1\Data\hb6\hb0435 2022-04-16 10-22-14\hb6_IE-3-90-10-1ML-
                  10min.M
Last changed    : 4/16/2022 10:22:53 AM by SYSTEM
                  (modified after loading)
Analysis Method : D:\ChemStation\1\Data\hb6\hb0435 2022-04-16 10-22-14\hb6_IE-3-90-10-1ML-
                  10min.M (Sequence Method)
Last changed    : 4/16/2022 10:58:03 AM by SYSTEM
                  (modified after loading)
Additional Info  : Peak(s) manually integrated
  
```

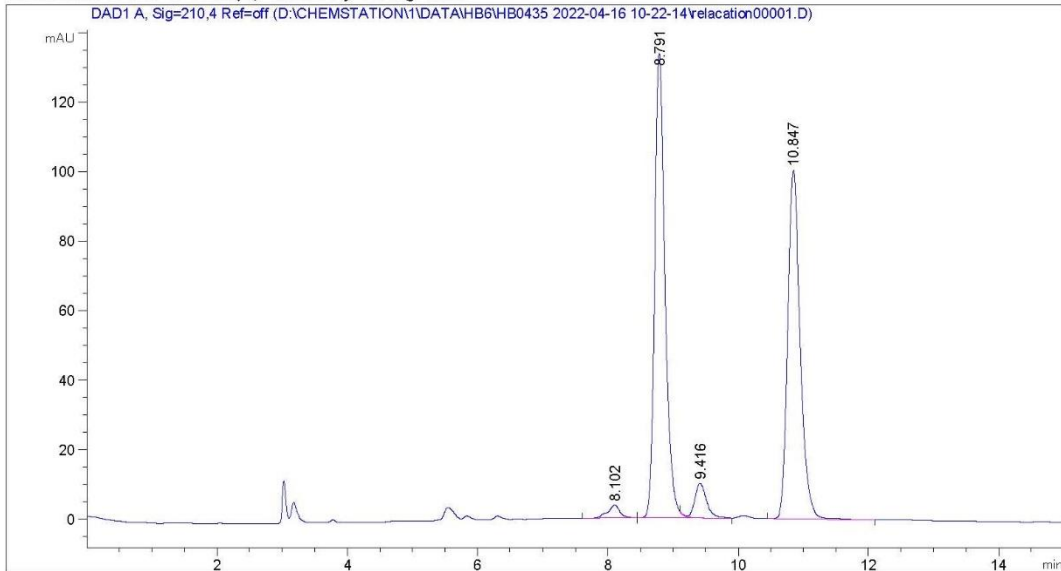

Area Percent Report

```

Sorted By      : Signal
Multiplier     : 1.0000
Dilution      : 1.0000
Use Multiplier & Dilution Factor with ISTDs
  
```

Signal 1: DAD1 A, Sig=210,4 Ref=off

| Peak # | RetTime [min] | Type | Width [min] | Area [mAU*s] | Height [mAU] | Area %  |
|--------|---------------|------|-------------|--------------|--------------|---------|
| 1      | 8.102         | BB   | 0.1901      | 49.39766     | 3.74002      | 1.6609  |
| 2      | 8.791         | BV R | 0.1664      | 1472.49548   | 133.76942    | 49.5103 |
| 3      | 9.416         | VB E | 0.1846      | 121.44904    | 9.93720      | 4.0835  |
| 4      | 10.847        | BB   | 0.2027      | 1330.77722   | 100.38687    | 44.7453 |

Totals : 2974.11941 247.83352

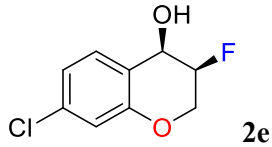

```

=====
Acq. Operator   : SYSTEM                      Seq. Line :    2
Sample Operator : SYSTEM
Acq. Instrument : LC                        Location  : P2-D-10
Injection Date  : 4/16/2022 10:38:53 AM      Inj       :    1
                                           Inj Volume: 1.000 µl
Different Inj Volume from Sample Entry! Actual Inj Volume : 0.500 µl
Acq. Method     : D:\ChemStation\1\Data\hb6\hb0435 2022-04-16 10-22-14\hb6_IE-3-90-10-1ML-
                  10min.M
Last changed    : 4/16/2022 10:22:53 AM by SYSTEM
Analysis Method : D:\ChemStation\1\Data\hb6\hb0435 2022-04-16 10-22-14\hb6_IE-3-90-10-1ML-
                  10min.M (Sequence Method)
Last changed    : 4/16/2022 10:58:03 AM by SYSTEM
                  (modified after loading)
Additional Info : Peak(s) manually integrated
DAD1 A, Sig=210,4 Ref=off (hb6\hb0435 2022-04-16 10-22-14\relacation00002.D)

```

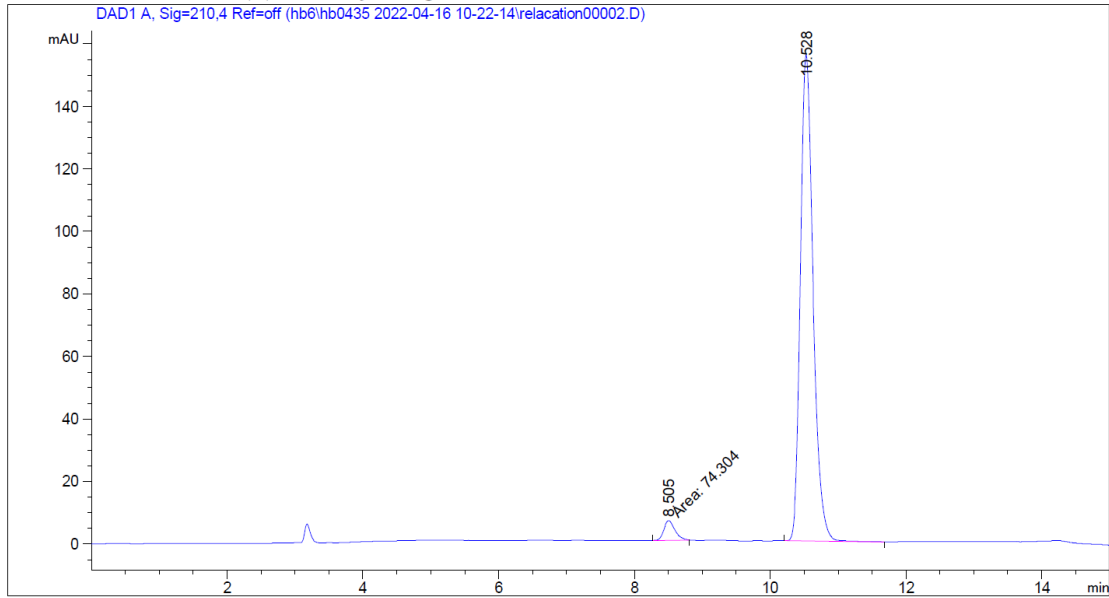

```

=====
                          Area Percent Report
=====

```

```

Sorted By      :      Signal
Multiplier     :      1.0000
Dilution      :      1.0000
Use Multiplier & Dilution Factor with ISTDs

```

Signal 1: DAD1 A, Sig=210,4 Ref=off

| Peak # | RetTime [min] | Type | Width [min] | Area [mAU*s] | Height [mAU] | Area %  |
|--------|---------------|------|-------------|--------------|--------------|---------|
| 1      | 8.505         | MM   | 0.1935      | 74.30401     | 6.40093      | 3.5543  |
| 2      | 10.528        | BB   | 0.1992      | 2016.22791   | 155.59818    | 96.4457 |



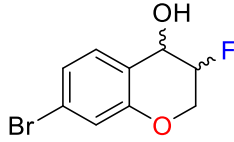

```

=====
Acq. Operator   : SYSTEM                      Seq. Line :    2
Acq. Instrument : 1290-DAD                    Location  : P1-D-01
Injection Date  : 1/21/2022 12:04:46 PM      Inj       :    1
                                           Inj Volume: 0.500 µl
Acq. Method     : d:\Chem32\1\Data\HB6\HB0455 2022-01-21 11-53-25\IE-3-90-10-0.45-0.5UL-10MIN
                                           .M
Last changed    : 1/21/2022 11:27:03 AM by SYSTEM
Analysis Method : d:\Chem32\1\Data\HB6\HB0455 2022-01-21 11-53-25\IE-3-90-10-0.45-0.5UL-10MIN
                                           .M (Sequence Method)
Last changed    : 4/15/2022 1:17:13 PM by SYSTEM
                                           (modified after loading)
Additional Info : Peak(s) manually integrated
  
```

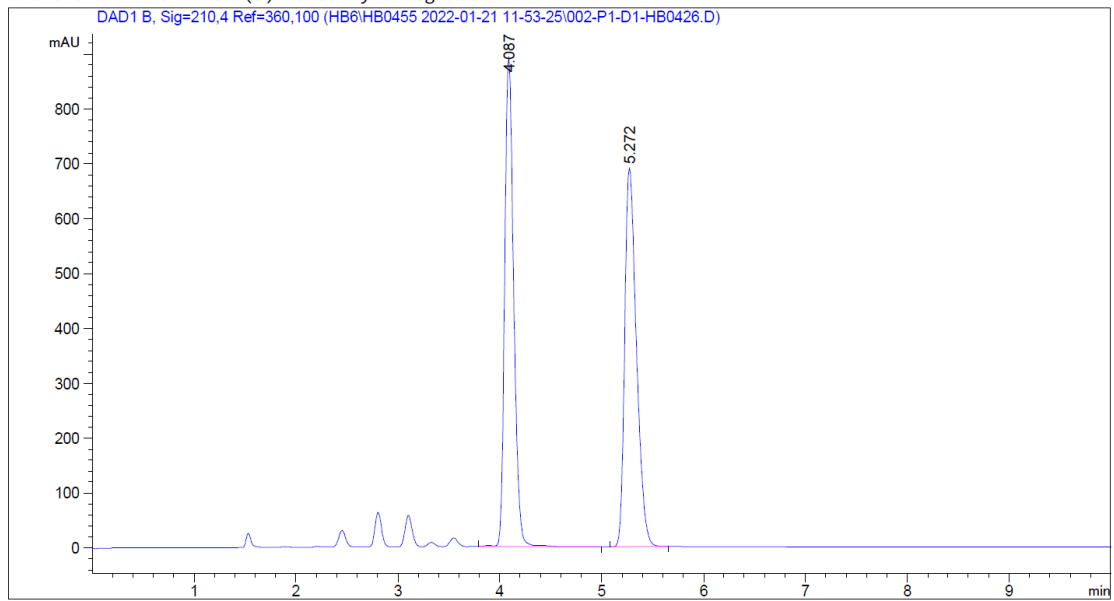

```

=====
                          Area Percent Report
=====
  
```

```

Sorted By      :      Signal
Multiplier     :      1.0000
Dilution       :      1.0000
Use Multiplier & Dilution Factor with ISTDs
  
```

Signal 1: DAD1 B, Sig=210,4 Ref=360,100

| Peak # | RetTime [min] | Type | Width [min] | Area [mAU*s] | Height [mAU] | Area %  |
|--------|---------------|------|-------------|--------------|--------------|---------|
| 1      | 4.087         | VV R | 0.0933      | 5463.86475   | 889.47711    | 49.8246 |
| 2      | 5.272         | BB   | 0.1230      | 5502.33984   | 690.20117    | 50.1754 |

Totals : 1.09662e4 1579.67828

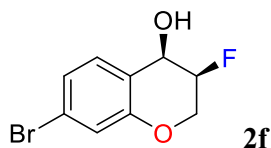

```

=====
Acq. Operator   : SYSTEM                      Seq. Line :    1
Acq. Instrument : 1290-DAD                    Location  : P1-D-02
Injection Date  : 1/21/2022 11:54:20 AM      Inj       :    1
                                           Inj Volume: 0.500 µl
Acq. Method     : d:\Chem32\1\Data\HB6\HB0455 2022-01-21 11-53-25\IE-3-90-10-0.45-0.SUL-10MIN
                                           .M
Last changed    : 1/21/2022 11:27:03 AM by SYSTEM
Analysis Method : d:\Chem32\1\Data\HB6\HB0455 2022-01-21 11-53-25\IE-3-90-10-0.45-0.SUL-10MIN
                                           .M (Sequence Method)
Last changed    : 4/15/2022 1:17:13 PM by SYSTEM
                                           (modified after loading)
Additional Info  : Peak(s) manually integrated
=====
  
```

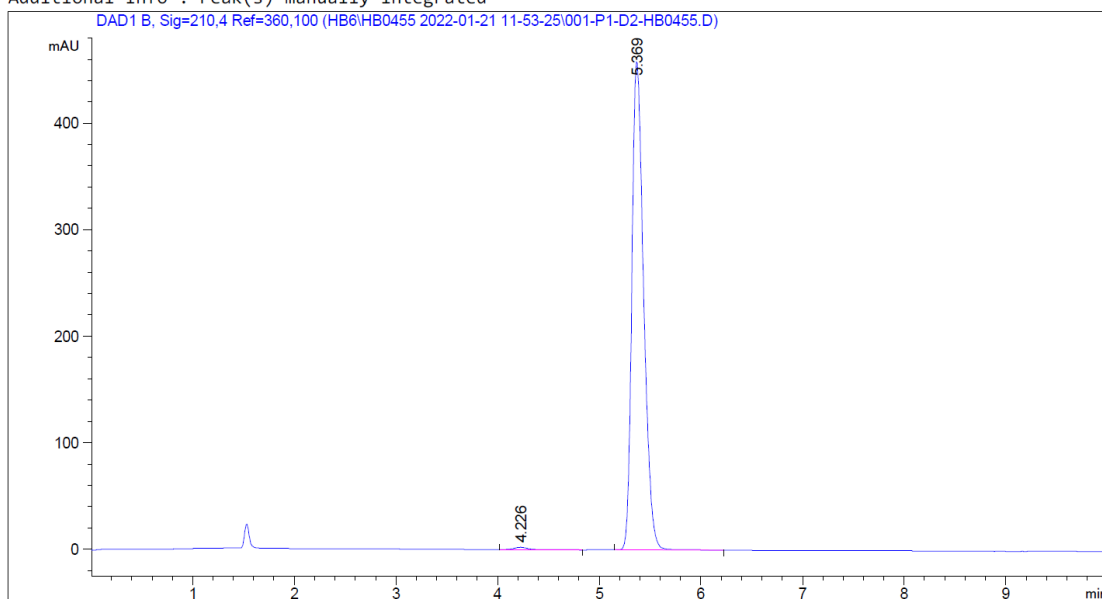

```

=====
                          Area Percent Report
=====
  
```

```

Sorted By      :      Signal
Multiplier     :      1.0000
Dilution       :      1.0000
Use Multiplier & Dilution Factor with ISTDs
  
```

Signal 1: DAD1 B, Sig=210,4 Ref=360,100

| Peak # | RetTime [min] | Type | Width [min] | Area [mAU*s] | Height [mAU] | Area %  |
|--------|---------------|------|-------------|--------------|--------------|---------|
| 1      | 4.226         | BB   | 0.1483      | 24.88840     | 2.41460      | 0.6706  |
| 2      | 5.369         | BB   | 0.1238      | 3686.73096   | 458.62585    | 99.3294 |

Totals :                                    3711.61935    461.04045

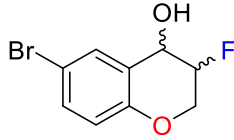

```

=====
Acq. Operator   : SYSTEM                      Seq. Line :    2
Acq. Instrument : 1290-DAD                   Location  : P1-D-01
Injection Date  : 1/21/2022 11:05:19 AM      Inj       :    1
                                           Inj Volume: 0.500 µl
Acq. Method     : d:\Chem32\1\Data\HB6\HB0456 2022-01-21 10-53-59\IF-3-90-10-0.5-0.5UL-10MIN.
                                           M
Last changed    : 1/16/2022 4:48:35 PM by SYSTEM
Analysis Method : d:\Chem32\1\Data\HB6\HB0456 2022-01-21 10-53-59\IF-3-90-10-0.5-0.5UL-10MIN.
                                           M (Sequence Method)
Last changed    : 4/15/2022 1:15:18 PM by SYSTEM
                                           (modified after loading)
Additional Info  : Peak(s) manually integrated
  
```

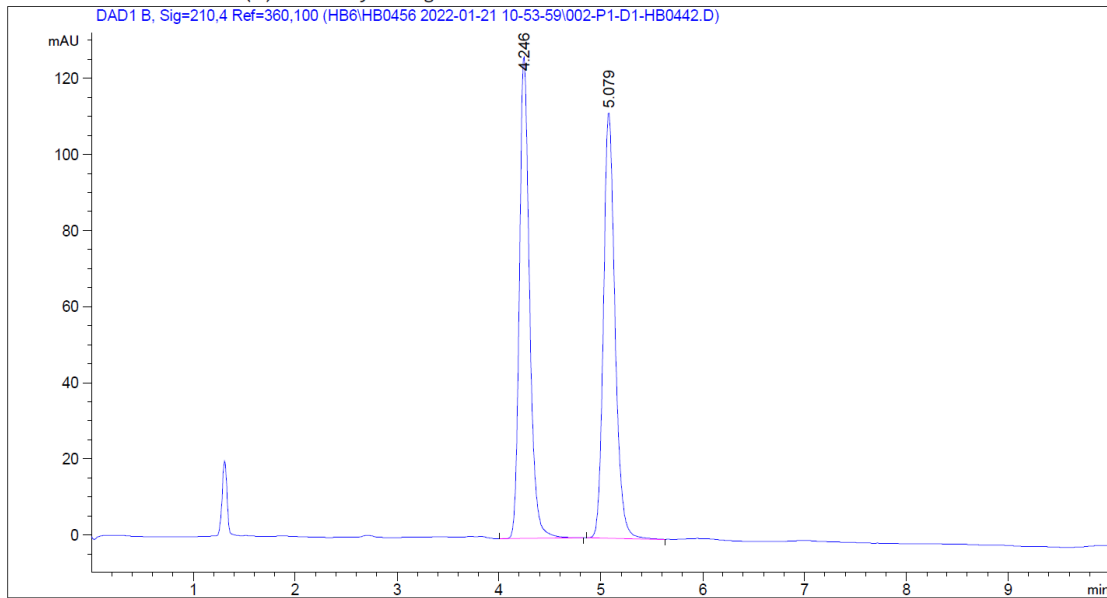

```

=====
                          Area Percent Report
=====
  
```

```

Sorted By       : Signal
Multiplier      : 1.0000
Dilution        : 1.0000
Use Multiplier & Dilution Factor with ISTDs
  
```

Signal 1: DAD1 B, Sig=210,4 Ref=360,100

| Peak # | RetTime [min] | Type | Width [min] | Area [mAU*s] | Height [mAU] | Area %  |
|--------|---------------|------|-------------|--------------|--------------|---------|
| 1      | 4.246         | BB   | 0.1049      | 878.08563    | 126.65380    | 49.9226 |
| 2      | 5.079         | BB   | 0.1198      | 880.80896    | 111.95924    | 50.0774 |

Totals :                    1758.89459   238.61304

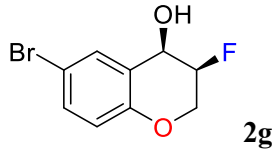

```

=====
Acq. Operator   : SYSTEM                      Seq. Line :    1
Acq. Instrument : 1290-DAD                    Location  : P1-D-02
Injection Date  : 1/21/2022 10:54:53 AM      Inj       :    1
                                           Inj Volume: 0.500 µl
Acq. Method     : d:\Chem32\1\Data\HB6\HB0456 2022-01-21 10-53-59\IF-3-90-10-0.5-0.5UL-10MIN.
                                           M
Last changed    : 1/16/2022 4:48:35 PM by SYSTEM
Analysis Method : d:\Chem32\1\Data\HB6\HB0456 2022-01-21 10-53-59\IF-3-90-10-0.5-0.5UL-10MIN.
                                           M (Sequence Method)
Last changed    : 4/15/2022 1:15:18 PM by SYSTEM
                                           (modified after loading)
Additional Info  : Peak(s) manually integrated
  
```

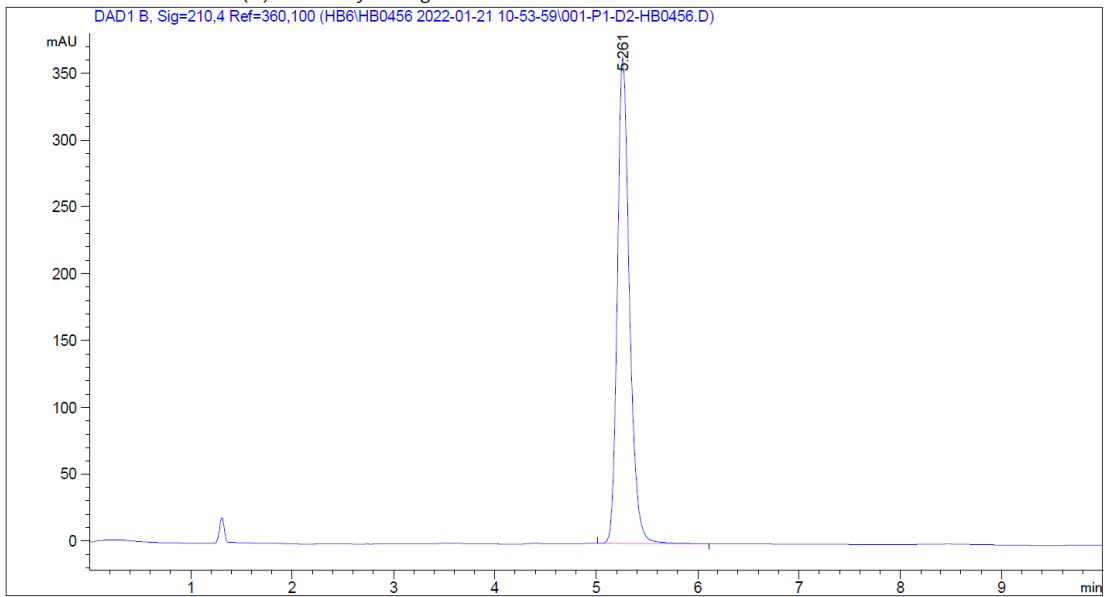

=====  
 Area Percent Report  
 =====

```

Sorted By      :      Signal
Multiplier     :      1.0000
Dilution       :      1.0000
Use Multiplier & Dilution Factor with ISTDs
  
```

Signal 1: DAD1 B, Sig=210,4 Ref=360,100

| Peak # | RetTime [min] | Type | Width [min] | Area [mAU*s] | Height [mAU] | Area %   |
|--------|---------------|------|-------------|--------------|--------------|----------|
| 1      | 5.261         | BB   | 0.1274      | 3033.09717   | 363.48572    | 100.0000 |

Totals :                                    3033.09717  363.48572

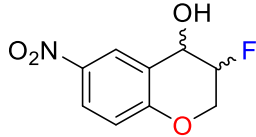

```

=====
Acq. Operator   : SYSTEM                      Seq. Line :    2
Sample Operator : SYSTEM
Acq. Instrument : LC                        Location  : P2-A-02
Injection Date  : 5/11/2022 9:30:54 AM      Inj       :    1
                                           Inj Volume: 1.000 µl
Different Inj Volume from Sample Entry! Actual Inj Volume : 0.500 µl
Acq. Method     : D:\ChemStation\1\Data\hb6\HB0503 2022-05-11 09-22-12\hb6_IE-3-50-50-1ML-
                 30min.M
Last changed    : 5/11/2022 9:22:21 AM by SYSTEM
Analysis Method : D:\ChemStation\1\Data\hb6\HB0503 2022-05-11 09-22-12\hb6_IE-3-50-50-1ML-
                 30min.M (Sequence Method)
Last changed    : 5/11/2022 9:43:57 AM by SYSTEM
Additional Info  : Peak(s) manually integrated
  
```

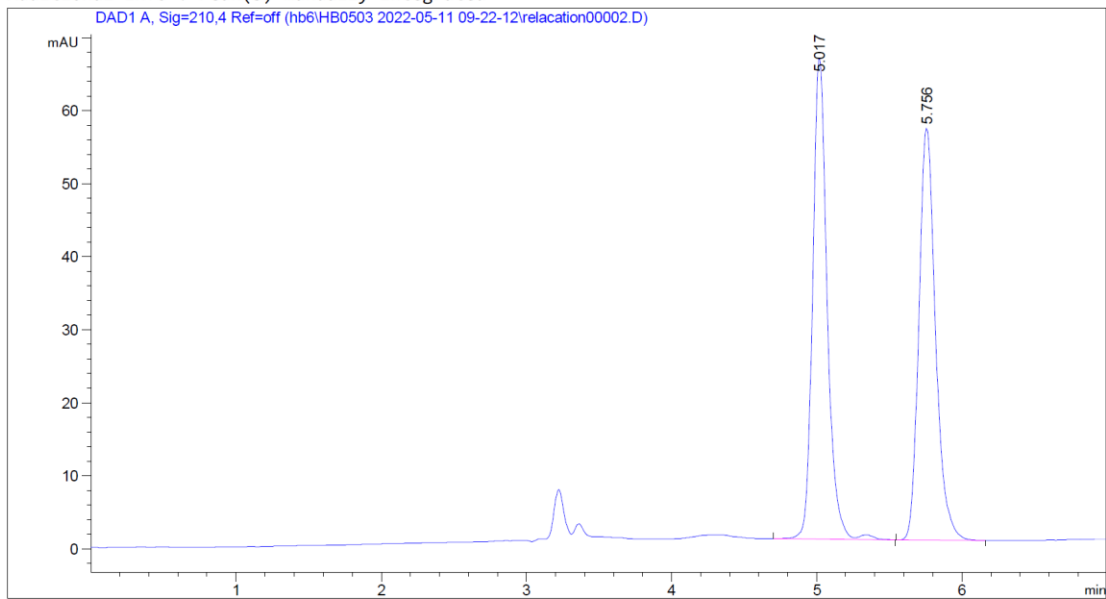

=====  
 Area Percent Report  
 =====

```

Sorted By      : Signal
Multiplier     : 1.0000
Dilution      : 1.0000
Use Multiplier & Dilution Factor with ISTDs
  
```

Signal 1: DAD1 A, Sig=210,4 Ref=off

| Peak # | RetTime [min] | Type | Width [min] | Area [mAU*s] | Height [mAU] | Area %  |
|--------|---------------|------|-------------|--------------|--------------|---------|
| 1      | 5.017         | BV R | 0.1050      | 457.99380    | 66.00484     | 50.4161 |
| 2      | 5.756         | BB   | 0.1231      | 450.43417    | 56.44759     | 49.5839 |

Totals :                    908.42798 122.45243

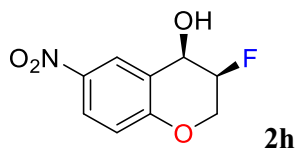

```

=====
Acq. Operator   : SYSTEM                      Seq. Line :    1
Sample Operator : SYSTEM
Acq. Instrument : LC                        Location  : P2-A-01
Injection Date  : 5/11/2022 9:23:03 AM      Inj       :    1
                                           Inj Volume: 1.000 µl
Different Inj Volume from Sample Entry! Actual Inj Volume : 5.000 µl
Acq. Method     : D:\ChemStation\1\Data\hb6\HB0503 2022-05-11 09-22-12\hb6_IE-3-50-50-1ML-
30min.M
Last changed    : 5/11/2022 9:22:21 AM by SYSTEM
                 (modified after loading)
Analysis Method : D:\ChemStation\1\Data\hb6\HB0503 2022-05-11 09-22-12\hb6_IE-3-50-50-1ML-
30min.M (Sequence Method)
Last changed    : 5/11/2022 9:42:58 AM by SYSTEM
                 (modified after loading)
Additional Info : Peak(s) manually integrated
  
```

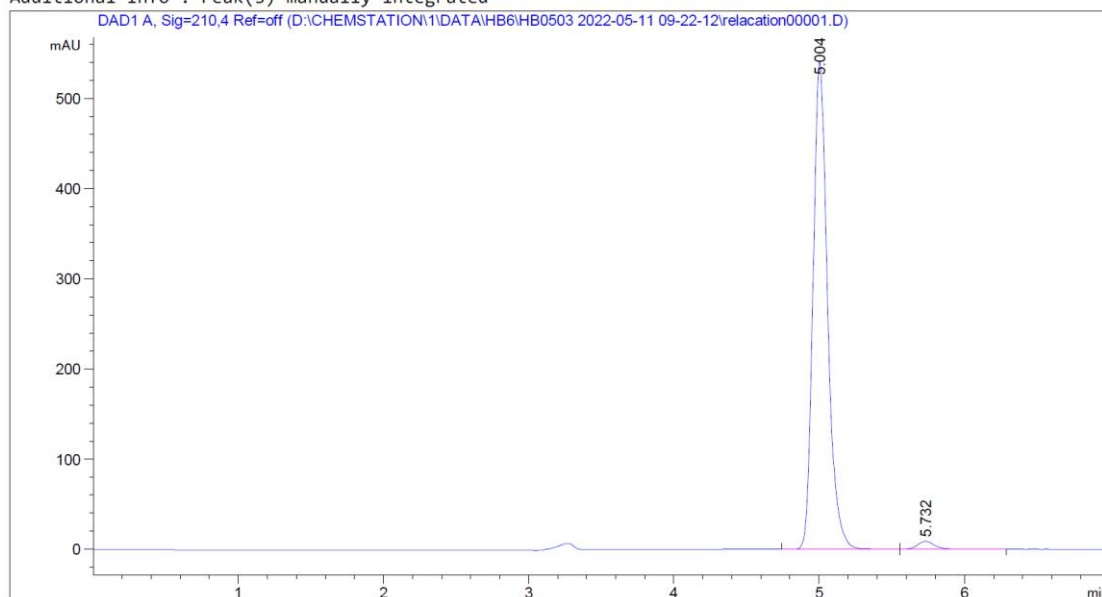

=====  
Area Percent Report  
=====

```

Sorted By      : Signal
Multiplier     : 1.0000
Dilution       : 1.0000
Use Multiplier & Dilution Factor with ISTDs
  
```

Signal 1: DAD1 A, Sig=210,4 Ref=off

| Peak # | RetTime [min] | Type | Width [min] | Area [mAU*s] | Height [mAU] | Area %  |
|--------|---------------|------|-------------|--------------|--------------|---------|
| 1      | 5.004         | BV   | 0.1067      | 3738.42480   | 540.69000    | 98.0800 |
| 2      | 5.732         | VB   | 0.1274      | 73.18188     | 8.76197      | 1.9200  |

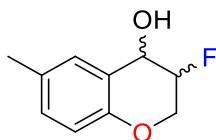

```

=====
Acq. Operator   : SYSTEM                      Seq. Line :    3
Sample Operator : SYSTEM
Acq. Instrument : LC                        Location  : P2-D-09
Injection Date  : 4/15/2022 9:32:58 AM      Inj       :    1
                                           Inj Volume: 1.000 µl
Different Inj Volume from Sample Entry! Actual Inj Volume : 0.500 µl
Acq. Method     : D:\ChemStation\1\Data\hb6\HB0494 2022-04-15 08-55-29\hb6_IF-3-90-10-1ML-
                 30min.M
Last changed    : 4/15/2022 9:33:34 AM by SYSTEM
                 (modified after loading)
Analysis Method : D:\ChemStation\1\Data\hb6\HB0494 2022-04-15 08-55-29\hb6_IF-3-90-10-1ML-
                 30min.M (Sequence Method)
Last changed    : 4/15/2022 9:51:51 AM by SYSTEM
                 (modified after loading)
Additional Info : Peak(s) manually integrated
=====

```

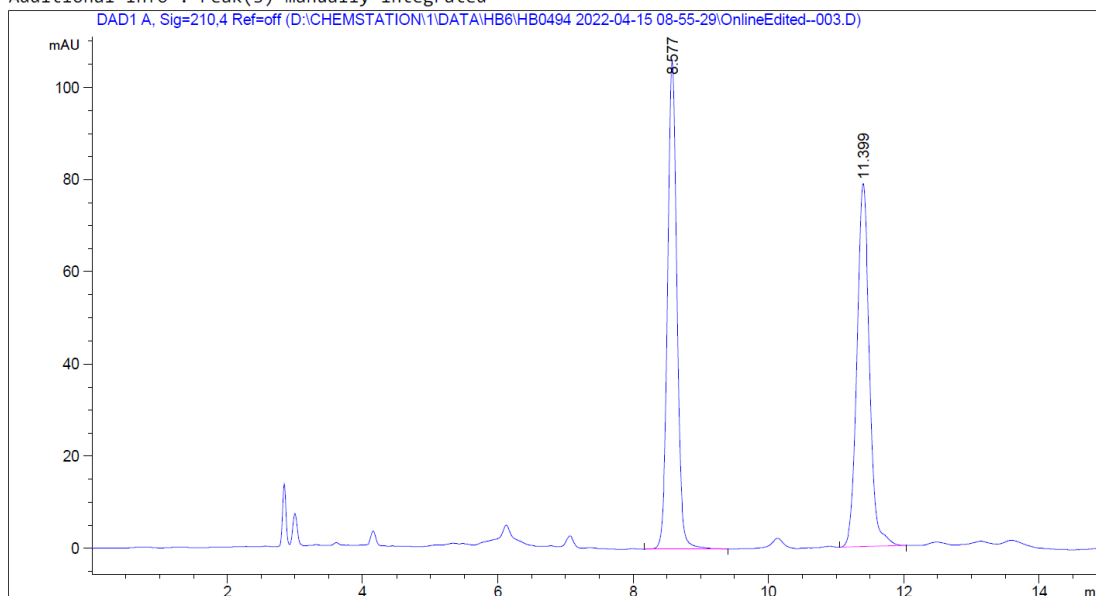

```

=====
                          Area Percent Report
=====

```

```

Sorted By      : Signal
Multiplier     : 1.0000
Dilution      : 1.0000
Use Multiplier & Dilution Factor with ISTDs

```

Signal 1: DAD1 A, Sig=210,4 Ref=off

| Peak # | RetTime [min] | Type | Width [min] | Area [mAU*s] | Height [mAU] | Area %  |
|--------|---------------|------|-------------|--------------|--------------|---------|
| 1      | 8.577         | BB   | 0.1454      | 1010.66382   | 105.88894    | 50.0347 |
| 2      | 11.399        | BB   | 0.1974      | 1009.26031   | 78.83788     | 49.9653 |

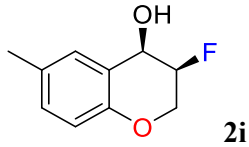

```

=====
Acq. Operator   : SYSTEM                      Seq. Line :    1
Sample Operator : SYSTEM
Acq. Instrument : LC                          Location  : P2-D-06
Injection Date  : 4/15/2022 8:56:18 AM       Inj       :    1
                                           Inj Volume: 1.000 µl
Different Inj Volume from Sample Entry! Actual Inj Volume : 0.500 µl
Acq. Method     : D:\ChemStation\1\Data\hb6\HB0494 2022-04-15 08-55-29\hb6_IF-3-90-10-1ML-
                 30min.M
Last changed    : 4/15/2022 8:56:40 AM by SYSTEM
                 (modified after loading)
Analysis Method : D:\ChemStation\1\Data\hb6\HB0494 2022-04-15 08-55-29\hb6_IF-3-90-10-1ML-
                 30min.M (Sequence Method)
Last changed    : 4/15/2022 9:51:51 AM by SYSTEM
                 (modified after loading)
Additional Info : Peak(s) manually integrated
  
```

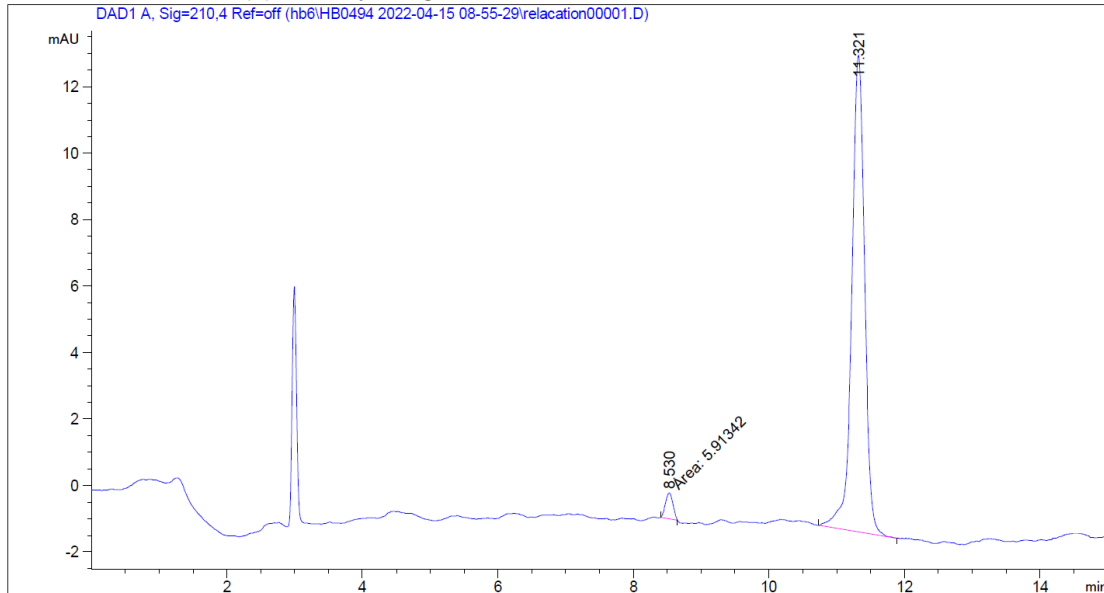

=====  
 Area Percent Report  
 =====

```

Sorted By      : Signal
Multiplier     : 1.0000
Dilution       : 1.0000
Use Multiplier & Dilution Factor with ISTDs
  
```

Signal 1: DAD1 A, Sig=210,4 Ref=off

| Peak # | RetTime [min] | Type | Width [min] | Area [mAU*s] | Height [mAU] | Area %  |
|--------|---------------|------|-------------|--------------|--------------|---------|
| 1      | 8.530         | MM   | 0.1260      | 5.91342      | 7.82083e-1   | 3.0564  |
| 2      | 11.321        | BB   | 0.2005      | 187.56075    | 14.34489     | 96.9436 |



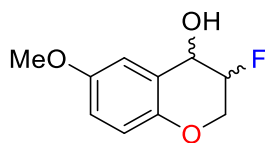

```

=====
Acq. Operator   : SYSTEM                      Seq. Line :    2
Sample Operator : SYSTEM
Acq. Instrument : LC                        Location  : P2-D-08
Injection Date  : 4/16/2022 9:43:01 AM      Inj       :    1
                                           Inj Volume: 1.000 µl
Different Inj Volume from Sample Entry! Actual Inj Volume : 0.500 µl
Acq. Method     : D:\ChemStation\1\Data\hb6\hb0491 2022-04-16 09-18-22\hb6_IF-3-70-30-1ML-
                 30min.M
Last changed    : 4/16/2022 9:41:34 AM by SYSTEM
Analysis Method : D:\ChemStation\1\Data\hb6\hb0491 2022-04-16 09-18-22\hb6_IF-3-70-30-1ML-
                 30min.M (Sequence Method)
Last changed    : 4/16/2022 10:12:12 AM by SYSTEM
                 (modified after loading)
Additional Info  : Peak(s) manually integrated
  
```

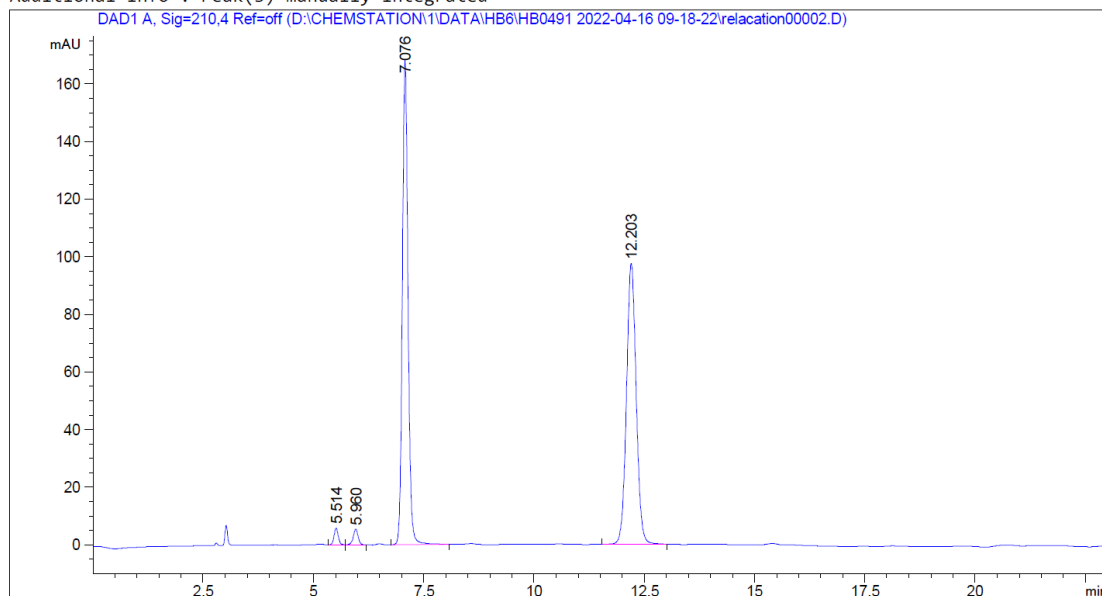

Area Percent Report

```

Sorted By      : Signal
Multiplier     : 1.0000
Dilution      : 1.0000
Use Multiplier & Dilution Factor with ISTDs
  
```

Signal 1: DAD1 A, Sig=210,4 Ref=off

| Peak # | RetTime [min] | Type | Width [min] | Area [mAU*s] | Height [mAU] | Area %  |
|--------|---------------|------|-------------|--------------|--------------|---------|
| 1      | 5.514         | BB   | 0.1000      | 37.78038     | 5.80128      | 1.2369  |
| 2      | 5.960         | BB   | 0.1128      | 40.48632     | 5.44117      | 1.3254  |
| 3      | 7.076         | BB   | 0.1351      | 1488.45520   | 168.39778    | 48.7289 |
| 4      | 12.203        | BB   | 0.2361      | 1487.83911   | 97.46669     | 48.7088 |

Totals : 3054.56101 277.10693

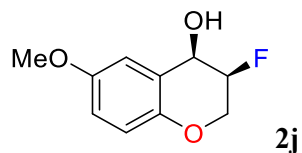

```

=====
Acq. Operator   : SYSTEM                      Seq. Line :    1
Sample Operator : SYSTEM
Acq. Instrument : LC                        Location  : P2-D-07
Injection Date  : 4/16/2022 9:19:12 AM      Inj       :    1
                                           Inj Volume: 1.000 µl
Different Inj Volume from Sample Entry! Actual Inj Volume : 0.500 µl
Acq. Method     : D:\ChemStation\1\Data\hb6\hb0491 2022-04-16 09-18-22\hb6_IF-3-70-30-1ML-
                 30min.M
Last changed    : 4/16/2022 9:41:34 AM by SYSTEM
                 (modified after loading)
Analysis Method : D:\ChemStation\1\Data\hb6\hb0491 2022-04-16 09-18-22\hb6_IF-3-70-30-1ML-
                 30min.M (Sequence Method)
Last changed    : 4/16/2022 10:12:12 AM by SYSTEM
                 (modified after loading)
Additional Info : Peak(s) manually integrated
  
```

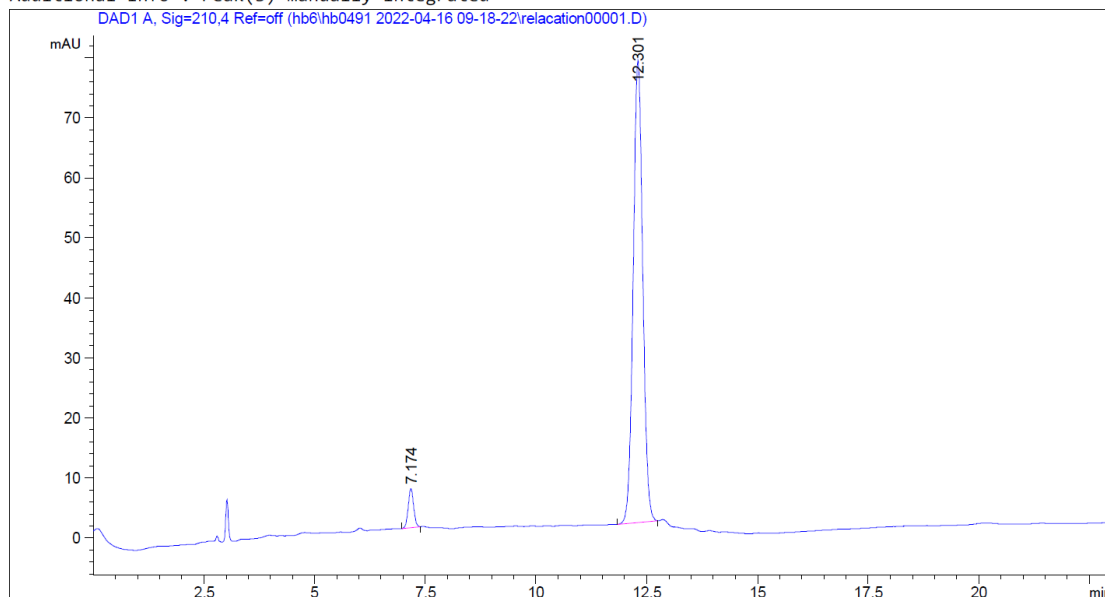

Area Percent Report

```

Sorted By      : Signal
Multiplier     : 1.0000
Dilution      : 1.0000
Use Multiplier & Dilution Factor with ISTDs
  
```

Signal 1: DAD1 A, Sig=210,4 Ref=off

| Peak # | RetTime [min] | Type | Width [min] | Area [mAU*s] | Height [mAU] | Area %  |
|--------|---------------|------|-------------|--------------|--------------|---------|
| 1      | 7.174         | BB   | 0.1309      | 54.90629     | 6.47710      | 4.5483  |
| 2      | 12.301        | BB   | 0.2325      | 1152.27161   | 77.02238     | 95.4517 |

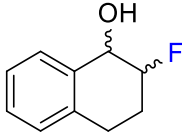

```

=====
Acq. Operator   : SYSTEM                      Seq. Line :    1
Sample Operator : SYSTEM
Acq. Instrument : LC                        Location  : P2-D-01
Injection Date  : 4/21/2022 8:56:04 AM      Inj       :    1
                                           Inj Volume: 1.000 µl
Different Inj Volume from Sample Entry! Actual Inj Volume : 0.500 µl
Acq. Method     : D:\ChemStation\1\Data\hb6\hb0500-507 2022-04-21 08-55-12\hb6_IF-3-90-10-1ML
                                           -13min.M
Last changed    : 1/12/2022 9:06:58 AM by SYSTEM
Analysis Method : D:\ChemStation\1\Data\hb6\hb0500-507 2022-04-21 08-55-12\hb6_IF-3-90-10-1ML
                                           -13min.M (Sequence Method)
Last changed    : 4/21/2022 11:09:25 AM by SYSTEM
                                           (modified after loading)
Additional Info  : Peak(s) manually integrated
DAD1 A, Sig=210,4 Ref=off (hb6\hb0500-507 2022-04-21 08-55-12\relacation00001.D)

```

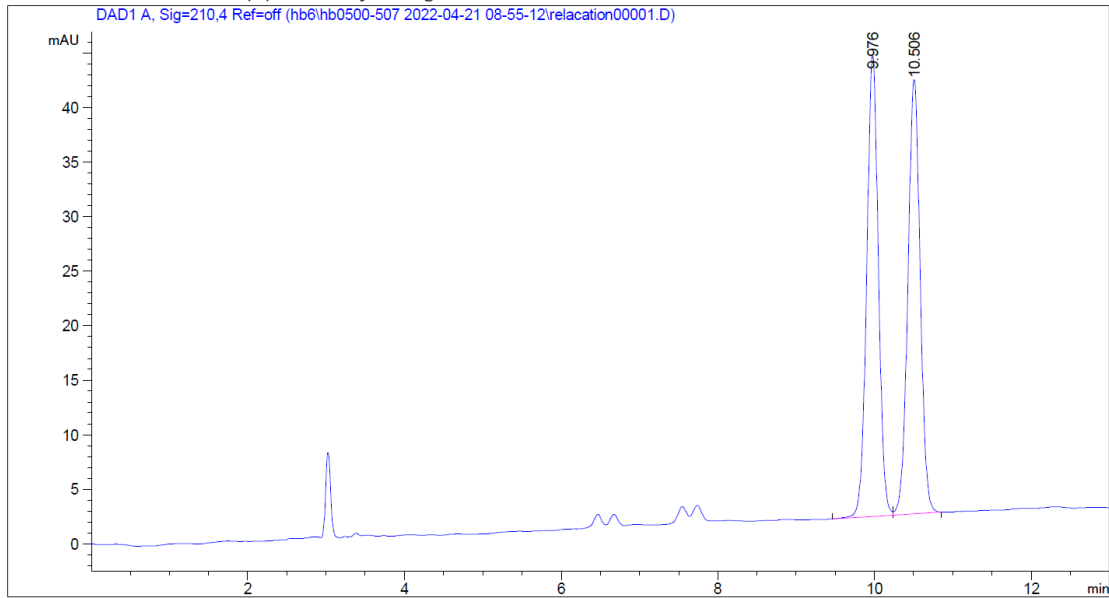

```

=====
                          Area Percent Report
=====

```

```

Sorted By      : Signal
Multiplier     : 1.0000
Dilution      : 1.0000
Use Multiplier & Dilution Factor with ISTDs

```

Signal 1: DAD1 A, Sig=210,4 Ref=off

| Peak # | RetTime [min] | Type | Width [min] | Area [mAU*s] | Height [mAU] | Area %  |
|--------|---------------|------|-------------|--------------|--------------|---------|
| 1      | 9.976         | BV   | 0.1606      | 436.86185    | 42.25964     | 50.1593 |
| 2      | 10.506        | VB   | 0.1692      | 434.08661    | 39.80902     | 49.8407 |

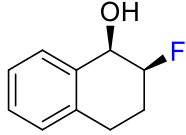

**2k**

```

=====
Acq. Operator   : SYSTEM                      Seq. Line :    2
Sample Operator : SYSTEM
Acq. Instrument : LC                        Location  : P2-D-02
Injection Date  : 4/21/2022 9:09:54 AM      Inj       :    1
                                           Inj Volume: 1.000 µl
Different Inj Volume from Sample Entry! Actual Inj Volume : 0.500 µl
Acq. Method     : D:\ChemStation\1\Data\hb6\hb0500-507 2022-04-21 08-55-12\hb6_IF-3-90-10-1ML
                  -13min.M
Last changed    : 1/12/2022 9:06:58 AM by SYSTEM
Analysis Method : D:\ChemStation\1\Data\hb6\hb0500-507 2022-04-21 08-55-12\hb6_IF-3-90-10-1ML
                  -13min.M (Sequence Method)
Last changed    : 4/21/2022 11:09:25 AM by SYSTEM
                  (modified after loading)
Additional Info : Peak(s) manually integrated
DAD1 A, Sig=210,4 Ref=off (hb6\hb0500-507 2022-04-21 08-55-12\relacation00002.D)

```

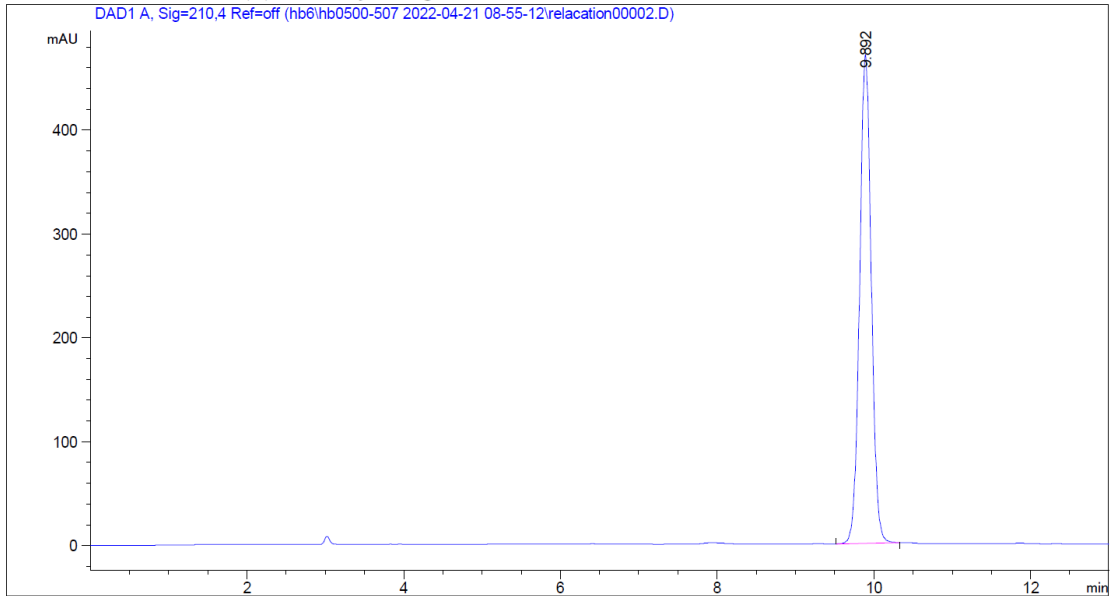

=====  
Area Percent Report  
=====

```

Sorted By      : Signal
Multiplier     : 1.0000
Dilution       : 1.0000
Use Multiplier & Dilution Factor with ISTDs

```

Signal 1: DAD1 A, Sig=210,4 Ref=off

| Peak # | RetTime [min] | Type | Width [min] | Area [mAU*s] | Height [mAU] | Area %   |
|--------|---------------|------|-------------|--------------|--------------|----------|
| 1      | 9.892         | BB   | 0.1587      | 4864.91992   | 470.38858    | 100.0000 |

Totals :                                    4864.91992  470.38858

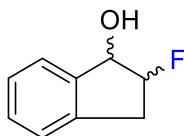

```

=====
Acq. Operator   : SYSTEM                      Seq. Line :    3
Acq. Instrument : 1290-DAD                    Location  : P1-C-01
Injection Date  : 1/12/2022 9:47:35 AM       Inj       :    1
                                           Inj Volume: 0.500 µl
Different Inj Volume from Sample Entry! Actual Inj Volume : 1.000 µl
Acq. Method     : d:\Chem32\1\Data\HB6\HB0434 2022-01-12 09-27-36\IE-3-95-5-0.4-0.5UL-8MIN.M
Last changed    : 1/12/2022 9:38:12 AM by SYSTEM
Analysis Method : d:\Chem32\1\Data\HB6\HB0434 2022-01-12 09-27-36\IE-3-95-5-0.4-0.5UL-8MIN.M
                 (Sequence Method)
Last changed    : 4/15/2022 2:22:07 PM by SYSTEM
                 (modified after loading)
Additional Info : Peak(s) manually integrated
  
```

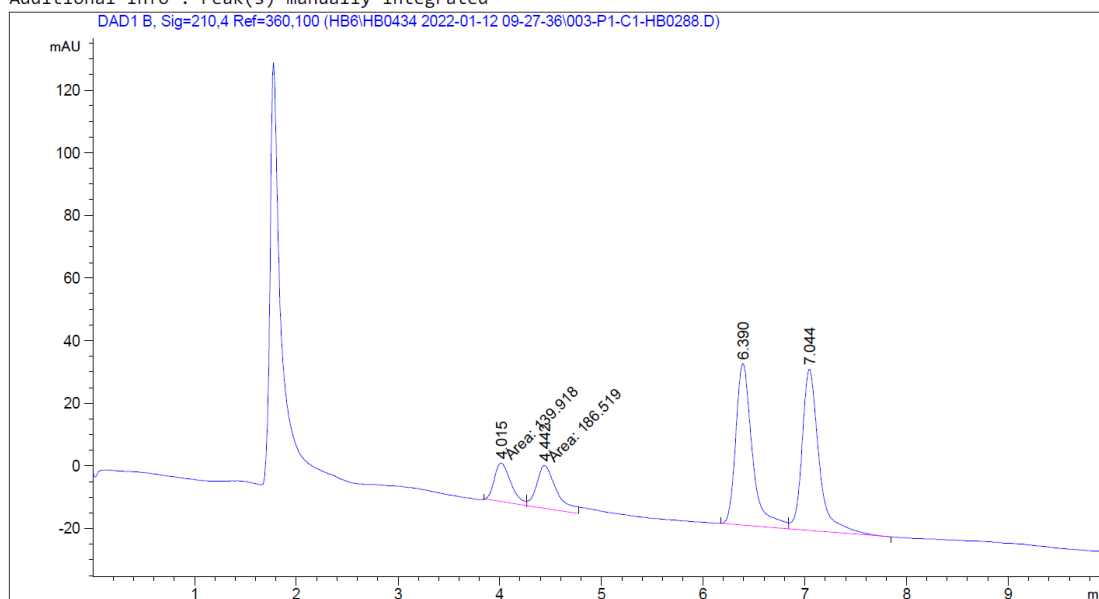

Area Percent Report

```

Sorted By      : Signal
Multiplier     : 1.0000
Dilution      : 1.0000
Use Multiplier & Dilution Factor with ISTDs
  
```

Signal 1: DAD1 B, Sig=210,4 Ref=360,100

| Peak # | RetTime [min] | Type | Width [min] | Area [mAU*s] | Height [mAU] | Area %  |
|--------|---------------|------|-------------|--------------|--------------|---------|
| 1      | 4.015         | MF   | 0.1895      | 139.91812    | 12.30830     | 9.3194  |
| 2      | 4.442         | FM   | 0.2277      | 186.51871    | 13.65295     | 12.4233 |
| 3      | 6.390         | BV   | 0.1699      | 582.71686    | 51.55563     | 38.8127 |
| 4      | 7.044         | VB   | 0.1720      | 592.20355    | 51.54663     | 39.4445 |

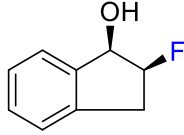

```

=====
Acq. Operator   : SYSTEM                      Seq. Line :    2
Acq. Instrument : 1290-DAD                   Location  : P1-C-02
Injection Date  : 1/12/2022 9:36:48 AM      Inj       :    1
                                           Inj Volume: 0.500 µl
Different Inj Volume from Sample Entry! Actual Inj Volume : 1.000 µl
Acq. Method     : d:\Chem32\1\Data\HB6\HB0434 2022-01-12 09-27-36\IE-3-95-5-0.4-0.5UL-8MIN.M
Last changed    : 1/12/2022 9:38:12 AM by SYSTEM
                (modified after loading)
Analysis Method : d:\Chem32\1\Data\HB6\HB0434 2022-01-12 09-27-36\IE-3-95-5-0.4-0.5UL-8MIN.M
                (Sequence Method)
Last changed    : 4/15/2022 2:22:07 PM by SYSTEM
                (modified after loading)
Additional Info  : Peak(s) manually integrated
DAD1 B, Sig=210,4 Ref=360,100 (D:\CHEM32\1\DATA\HB6\HB0434 2022-01-12 09-27-36\002-P1-C2-HB0434.D)
  
```

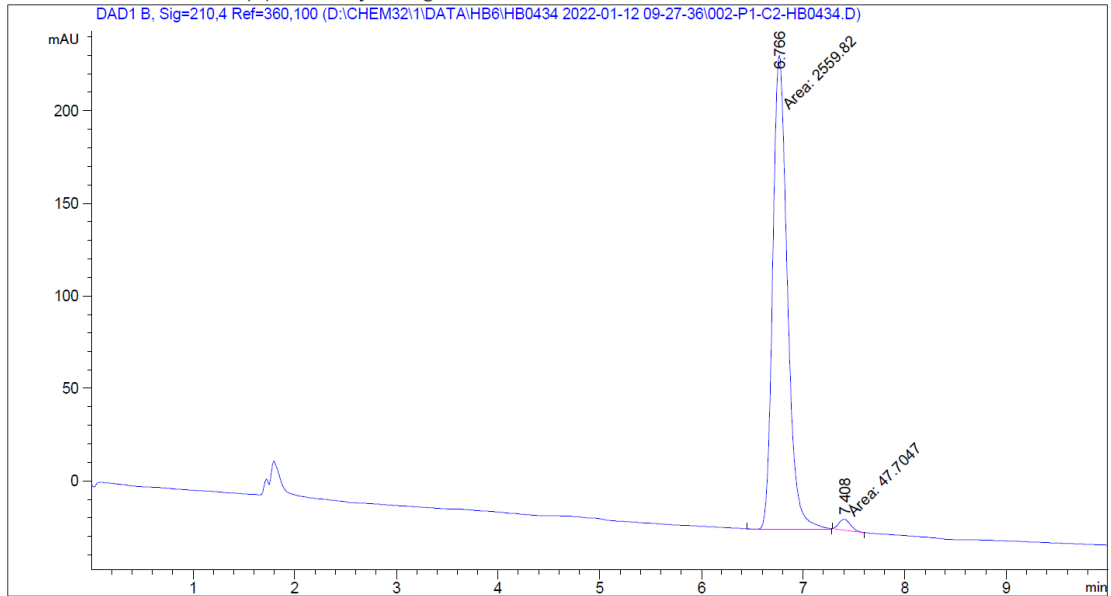

Area Percent Report

```

Sorted By      : Signal
Multiplier     : 1.0000
Dilution       : 1.0000
Use Multiplier & Dilution Factor with ISTDs
  
```

Signal 1: DAD1 B, Sig=210,4 Ref=360,100

| Peak # | RetTime [min] | Type | Width [min] | Area [mAU*s] | Height [mAU] | Area %  |
|--------|---------------|------|-------------|--------------|--------------|---------|
| 1      | 6.766         | MM   | 0.1667      | 2559.81787   | 255.96498    | 98.1705 |
| 2      | 7.408         | MM   | 0.1339      | 47.70472     | 5.93678      | 1.8295  |

Totals : 2607.52259 261.90176

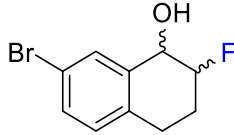

```

=====
Acq. Operator   : SYSTEM                      Seq. Line :    3
Sample Operator : SYSTEM
Acq. Instrument : LC                        Location  : P2-D-03
Injection Date  : 4/21/2022 9:23:42 AM      Inj       :    1
                                           Inj Volume: 1.000 µl
Different Inj Volume from Sample Entry! Actual Inj Volume : 0.500 µl
Acq. Method     : D:\ChemStation\1\Data\hb6\hb0500-507 2022-04-21 08-55-12\hb6_IF-3-90-10-1ML
                                           -13min.M
Last changed    : 4/21/2022 9:24:16 AM by SYSTEM
                                           (modified after loading)
Analysis Method : D:\ChemStation\1\Data\hb6\hb0500-507 2022-04-21 08-55-12\hb6_IF-3-90-10-1ML
                                           -13min.M (Sequence Method)
Last changed    : 4/21/2022 11:09:25 AM by SYSTEM
                                           (modified after loading)
Additional Info  : Peak(s) manually integrated
  
```

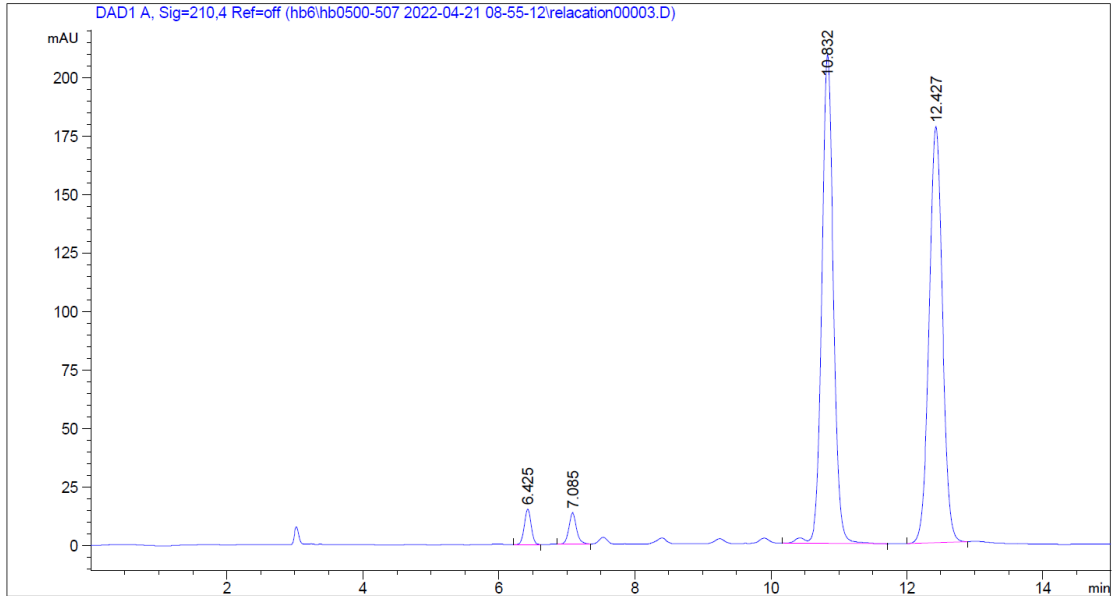

=====  
Area Percent Report  
=====

```

Sorted By      : Signal
Multiplier     : 1.0000
Dilution       : 1.0000
Use Multiplier & Dilution Factor with ISTDs
  
```

Signal 1: DAD1 A, Sig=210,4 Ref=off

| Peak # | RetTime [min] | Type | Width [min] | Area [mAU*s] | Height [mAU] | Area %  |
|--------|---------------|------|-------------|--------------|--------------|---------|
| 1      | 6.425         | BB   | 0.1057      | 103.16124    | 15.10779     | 2.0211  |
| 2      | 7.085         | BB   | 0.1200      | 106.25610    | 13.47160     | 2.0818  |
| 3      | 10.832        | VB R | 0.1810      | 2477.78882   | 209.00507    | 48.5447 |
| 4      | 12.427        | BB   | 0.2106      | 2416.93628   | 177.82518    | 47.3524 |

Totals :                    5104.14244   415.40964

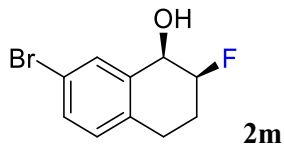

```

=====
Acq. Operator   : SYSTEM                      Seq. Line :    4
Sample Operator : SYSTEM
Acq. Instrument : LC                        Location  : P2-D-04
Injection Date  : 4/21/2022 9:39:31 AM      Inj       :    1
                                           Inj Volume: 1.000 µl
Different Inj Volume from Sample Entry! Actual Inj Volume : 0.500 µl
Acq. Method     : D:\ChemStation\1\Data\hb6\hb0500-507 2022-04-21 08-55-12\hb6_IF-3-90-10-1ML
                                           -13min.M
Last changed    : 4/21/2022 9:24:16 AM by SYSTEM
Analysis Method : D:\ChemStation\1\Data\hb6\hb0500-507 2022-04-21 08-55-12\hb6_IF-3-90-10-1ML
                                           -13min.M (Sequence Method)
Last changed    : 4/21/2022 11:09:25 AM by SYSTEM
                                           (modified after loading)
Additional Info  : Peak(s) manually integrated
  
```

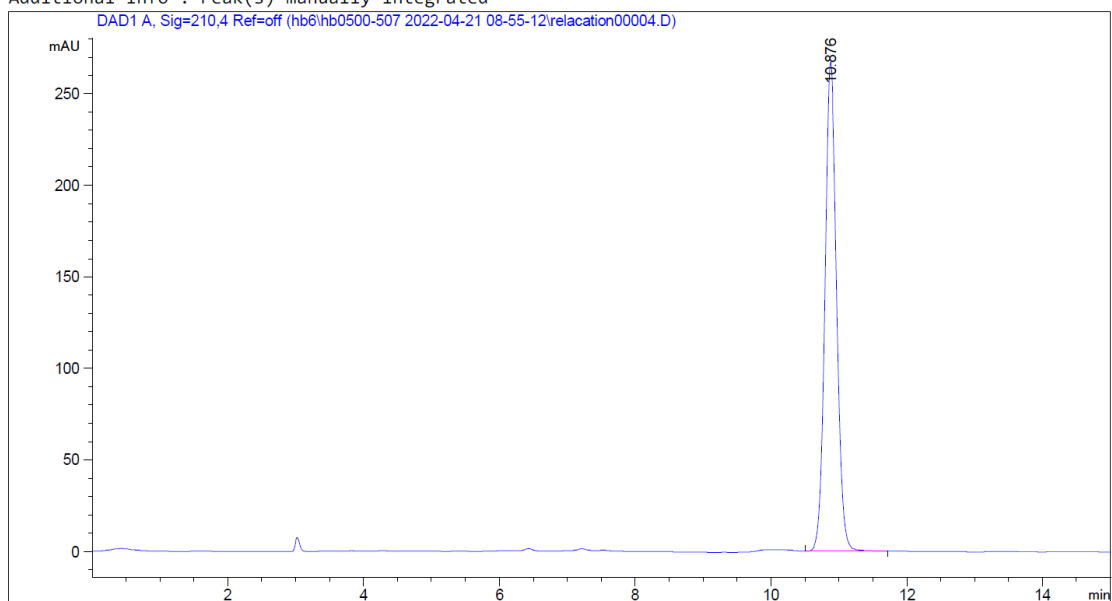

=====  
 Area Percent Report  
 =====

```

Sorted By      :      Signal
Multiplier     :      1.0000
Dilution       :      1.0000
Use Multiplier & Dilution Factor with ISTDs
  
```

Signal 1: DAD1 A, Sig=210,4 Ref=off

| Peak # | RetTime [min] | Type | Width [min] | Area [mAU*s] | Height [mAU] | Area %   |
|--------|---------------|------|-------------|--------------|--------------|----------|
| 1      | 10.876        | BB   | 0.1825      | 3174.99268   | 267.35388    | 100.0000 |

Totals :                                    3174.99268   267.35388



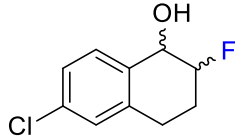

```

=====
Acq. Operator   : SYSTEM                      Seq. Line :    5
Sample Operator : SYSTEM
Acq. Instrument : LC                        Location  : P2-D-05
Injection Date  : 4/21/2022 9:55:20 AM      Inj       :    1
                                           Inj Volume: 1.000 µl
Different Inj Volume from Sample Entry! Actual Inj Volume : 0.500 µl
Acq. Method     : D:\ChemStation\1\Data\hb6\hb0500-507 2022-04-21 08-55-12\hb6_IF-3-90-10-1ML
                                           -13min.M
Last changed    : 4/21/2022 9:24:16 AM by SYSTEM
Analysis Method : D:\ChemStation\1\Data\hb6\hb0500-507 2022-04-21 08-55-12\hb6_IF-3-90-10-1ML
                                           -13min.M (Sequence Method)
Last changed    : 4/21/2022 11:09:25 AM by SYSTEM
                                           (modified after loading)
Additional Info  : Peak(s) manually integrated
DAD1 A, Sig=210,4 Ref=off (hb6\hb0500-507 2022-04-21 08-55-12\relacation00005.D)

```

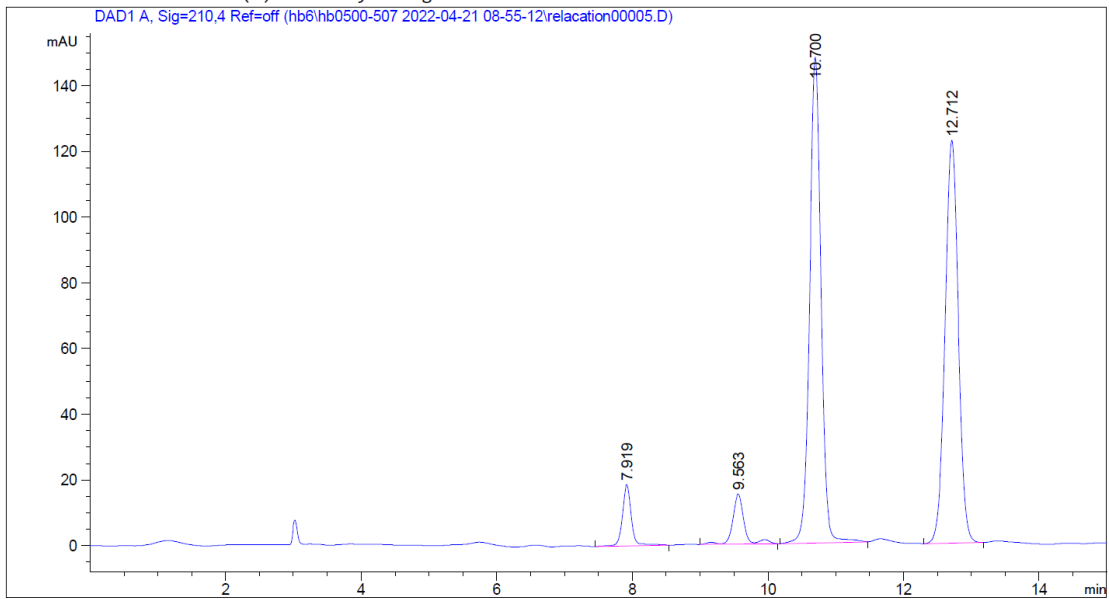

Area Percent Report

```

Sorted By      : Signal
Multiplier     : 1.0000
Dilution      : 1.0000
Use Multiplier & Dilution Factor with ISTDs

```

Signal 1: DAD1 A, Sig=210,4 Ref=off

| Peak # | RetTime [min] | Type | Width [min] | Area [mAU*s] | Height [mAU] | Area %  |
|--------|---------------|------|-------------|--------------|--------------|---------|
| 1      | 7.919         | BB   | 0.1396      | 172.13202    | 18.66072     | 4.6121  |
| 2      | 9.563         | VV R | 0.1662      | 178.40820    | 15.26559     | 4.7803  |
| 3      | 10.700        | BB   | 0.1776      | 1716.37402   | 147.72502    | 45.9888 |
| 4      | 12.712        | BB   | 0.2105      | 1665.24536   | 122.61124    | 44.6188 |

Totals : 3732.15961 304.26257

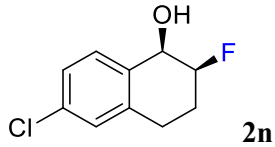

```

=====
Acq. Operator   : SYSTEM                      Seq. Line :    6
Sample Operator : SYSTEM
Acq. Instrument : LC                        Location  : P2-D-06
Injection Date  : 4/21/2022 10:11:09 AM      Inj       :    1
                                           Inj Volume: 1.000 µl
Different Inj Volume from Sample Entry! Actual Inj Volume : 0.500 µl
Acq. Method     : D:\ChemStation\1\Data\hb6\hb0500-507 2022-04-21 08-55-12\hb6_IF-3-90-10-1ML
                  -13min.M
Last changed    : 4/21/2022 9:24:16 AM by SYSTEM
Analysis Method : D:\ChemStation\1\Data\hb6\hb0500-507 2022-04-21 08-55-12\hb6_IF-3-90-10-1ML
                  -13min.M (Sequence Method)
Last changed    : 4/21/2022 11:09:25 AM by SYSTEM
                  (modified after loading)
Additional Info  : Peak(s) manually integrated
                  DAD1 A, Sig=210.4 Ref=off (hb6\hb0500-507 2022-04-21 08-55-12\relacation00006.D)
=====

```

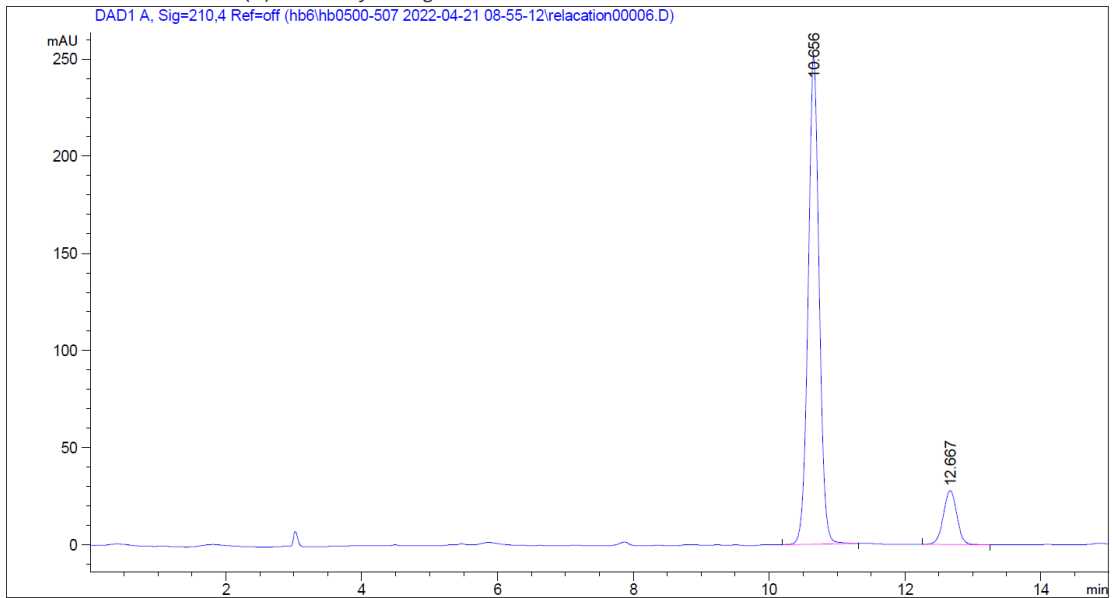

=====  
Area Percent Report  
=====

```

Sorted By      :      Signal
Multiplier     :      1.0000
Dilution      :      1.0000
Use Multiplier & Dilution Factor with ISTDs

```

Signal 1: DAD1 A, Sig=210,4 Ref=off

| Peak # | RetTime [min] | Type | Width [min] | Area [mAU*s] | Height [mAU] | Area %  |
|--------|---------------|------|-------------|--------------|--------------|---------|
| 1      | 10.656        | BB   | 0.1743      | 2843.49219   | 250.78300    | 88.2430 |
| 2      | 12.667        | BB   | 0.2110      | 378.85104    | 27.80083     | 11.7570 |

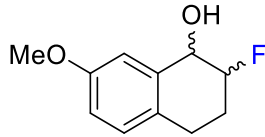

```

=====
Acq. Operator   : SYSTEM                      Seq. Line :    2
Sample Operator : SYSTEM
Acq. Instrument : LC                        Location  : P2-D-05
Injection Date  : 4/15/2022 9:12:08 AM      Inj       :    1
                                           Inj Volume: 1.000 µl
Different Inj Volume from Sample Entry! Actual Inj Volume : 0.500 µl
Acq. Method     : D:\ChemStation\1\Data\hb6\HB0494 2022-04-15 08-55-29\hb6_IF-3-90-10-1ML-
                 30min.M
Last changed    : 4/15/2022 9:24:17 AM by SYSTEM
                 (modified after loading)
Analysis Method : D:\ChemStation\1\Data\hb6\HB0494 2022-04-15 08-55-29\hb6_IF-3-90-10-1ML-
                 30min.M (Sequence Method)
Last changed    : 4/15/2022 9:51:51 AM by SYSTEM
                 (modified after loading)
Additional Info : Peak(s) manually integrated
  
```

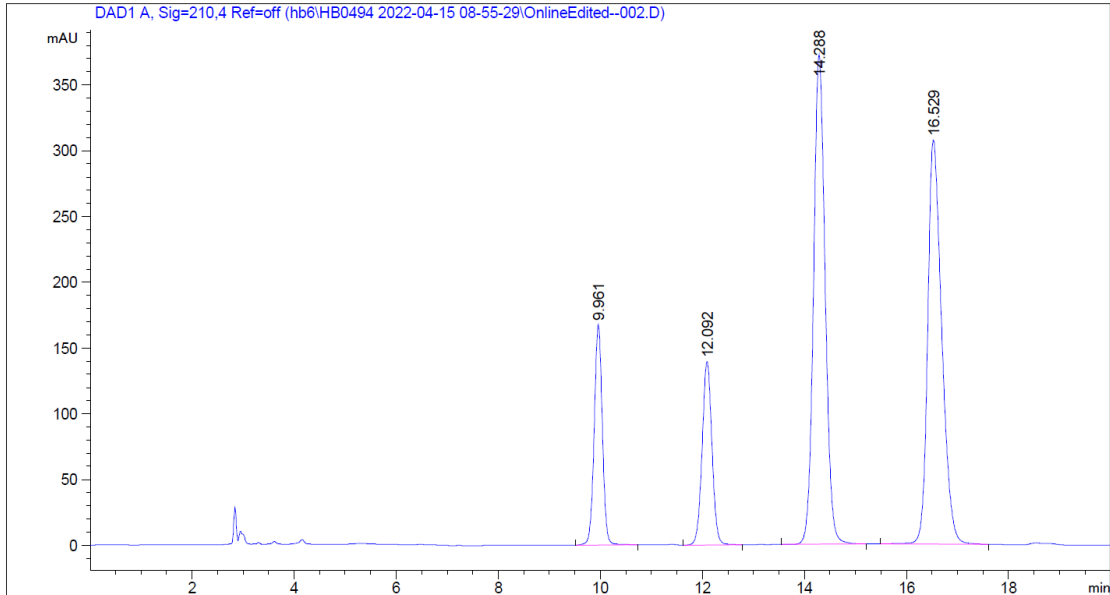

Area Percent Report

```

Sorted By      : Signal
Multiplier     : 1.0000
Dilution       : 1.0000
Use Multiplier & Dilution Factor with ISTDs
  
```

Signal 1: DAD1 A, Sig=210,4 Ref=off

| Peak # | RetTime [min] | Type | Width [min] | Area [mAU*s] | Height [mAU] | Area %  |
|--------|---------------|------|-------------|--------------|--------------|---------|
| 1      | 9.961         | BB   | 0.1709      | 1853.91919   | 167.73854    | 11.9943 |
| 2      | 12.092        | BB   | 0.2062      | 1868.16284   | 139.51624    | 12.0865 |
| 3      | 14.288        | BB   | 0.2419      | 5870.72070   | 372.39542    | 37.9819 |
| 4      | 16.529        | BB   | 0.2906      | 5863.83984   | 307.29147    | 37.9373 |

Totals : 1.54566e4 986.94167

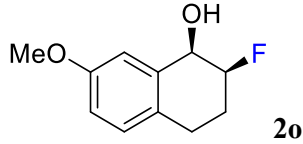

```

=====
Acq. Operator   : SYSTEM                      Seq. Line :    1
Sample Operator : SYSTEM
Acq. Instrument : LC                        Location  : P2-D-05
Injection Date  : 4/15/2022 8:30:32 AM      Inj       :    1
                                           Inj Volume: 1.000 µl
Different Inj Volume from Sample Entry! Actual Inj Volume : 0.500 µl
Acq. Method     : D:\ChemStation\1\Data\hb6\HB0480-3 2022-04-15 08-29-42\hb6_IF-3-90-10-1ML-
                 30min.M
Last changed    : 4/15/2022 8:29:53 AM by SYSTEM
                 (modified after loading)
Analysis Method : D:\ChemStation\1\Data\hb6\HB0480-3 2022-04-15 08-29-42\hb6_IF-3-90-10-1ML-
                 30min.M (Sequence Method)
Last changed    : 4/15/2022 9:57:44 AM by SYSTEM
                 (modified after loading)
Additional Info  : Peak(s) manually integrated
  
```

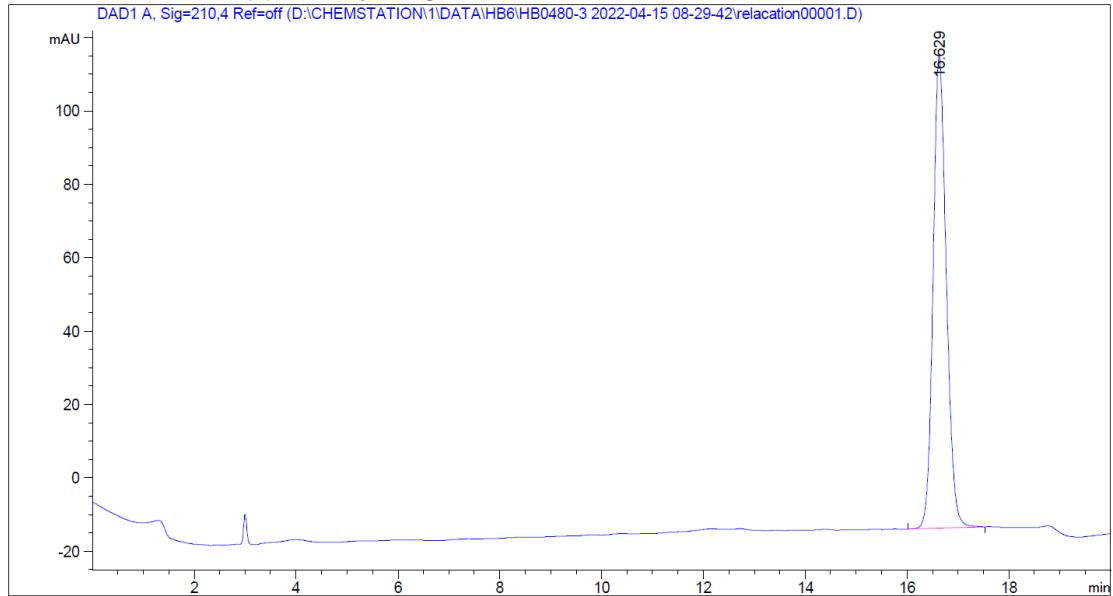

=====  
 Area Percent Report  
 =====

```

Sorted By      :      Signal
Multiplier     :      1.0000
Dilution       :      1.0000
Use Multiplier & Dilution Factor with ISTDs
  
```

Signal 1: DAD1 A, Sig=210,4 Ref=off

| Peak # | RetTime [min] | Type | Width [min] | Area [mAU*s] | Height [mAU] | Area %   |
|--------|---------------|------|-------------|--------------|--------------|----------|
| 1      | 16.629        | BB   | 0.2765      | 2322.59009   | 128.73792    | 100.0000 |

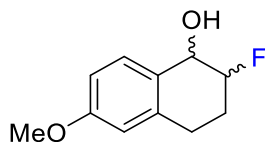

```

=====
Acq. Operator   : SYSTEM                      Seq. Line :    7
Sample Operator : SYSTEM
Acq. Instrument : LC                        Location  : P2-D-07
Injection Date  : 4/21/2022 10:26:58 AM      Inj       :    1
                                           Inj Volume: 1.000 µl
Different Inj Volume from Sample Entry! Actual Inj Volume : 0.500 µl
Acq. Method     : D:\ChemStation\1\Data\hb6\hb0500-507 2022-04-21 08-55-12\hb6_IF-3-90-10-1ML
                  -13min.M
Last changed    : 4/21/2022 10:26:59 AM by SYSTEM
                  (modified after loading)
Analysis Method : D:\ChemStation\1\Data\hb6\hb0500-507 2022-04-21 08-55-12\hb6_IF-3-90-10-1ML
                  -13min.M (Sequence Method)
Last changed    : 4/21/2022 11:09:25 AM by SYSTEM
                  (modified after loading)
Additional Info : Peak(s) manually integrated
  
```

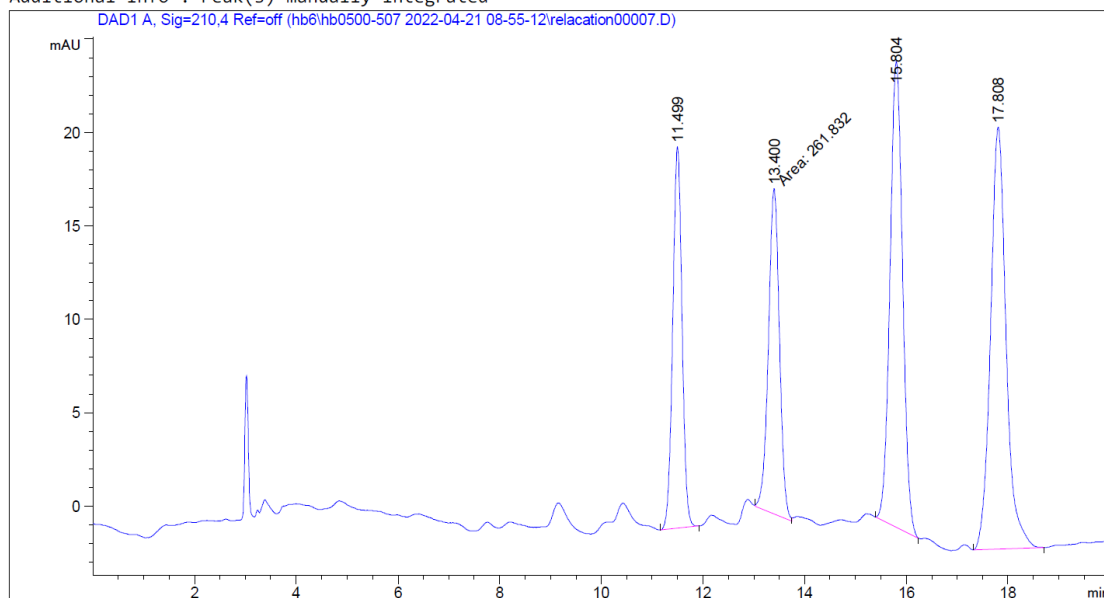

Area Percent Report

```

Sorted By      : Signal
Multiplier     : 1.0000
Dilution       : 1.0000
Use Multiplier & Dilution Factor with ISTDs
  
```

Signal 1: DAD1 A, Sig=210,4 Ref=off

| Peak # | RetTime [min] | Type | Width [min] | Area [mAU*s] | Height [mAU] | Area %  |
|--------|---------------|------|-------------|--------------|--------------|---------|
| 1      | 11.499        | BB   | 0.1956      | 258.59717    | 20.43511     | 18.1188 |
| 2      | 13.400        | MM   | 0.2506      | 261.83215    | 17.41634     | 18.3455 |
| 3      | 15.804        | BB   | 0.2662      | 427.71014    | 24.92516     | 29.9679 |
| 4      | 17.808        | BB   | 0.3195      | 479.09048    | 22.57970     | 33.5679 |

Totals : 1427.22995 85.35631

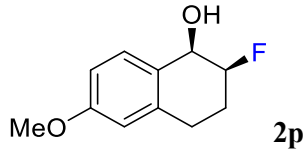

```

=====
Acq. Operator   : SYSTEM                      Seq. Line :    8
Sample Operator : SYSTEM
Acq. Instrument : LC                        Location  : P2-D-08
Injection Date  : 4/21/2022 10:47:48 AM      Inj       :    1
                                           Inj Volume: 1.000 µl
Different Inj Volume from Sample Entry! Actual Inj Volume : 0.500 µl
Acq. Method     : D:\ChemStation\1\Data\hb6\hb0500-507 2022-04-21 08-55-12\hb6_IF-3-90-10-1ML
                                           -13min.M
Last changed    : 4/21/2022 10:26:59 AM by SYSTEM
Analysis Method : D:\ChemStation\1\Data\hb6\hb0500-507 2022-04-21 08-55-12\hb6_IF-3-90-10-1ML
                                           -13min.M (Sequence Method)
Last changed    : 4/21/2022 11:09:25 AM by SYSTEM
                                           (modified after loading)
Additional Info  : Peak(s) manually integrated
=====

```

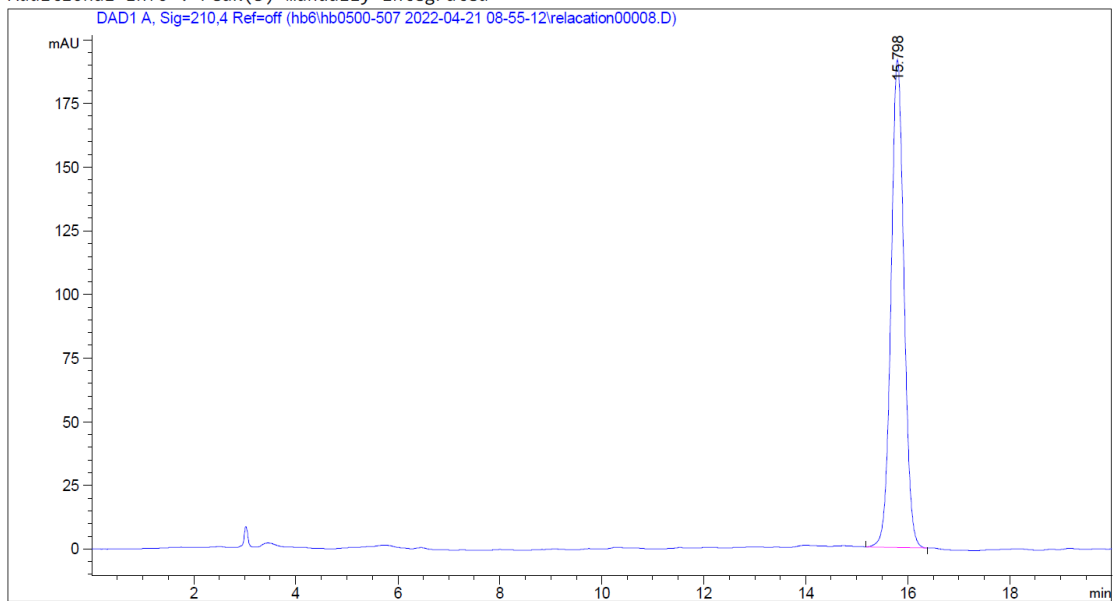

=====  
Area Percent Report  
=====

```

Sorted By      :      Signal
Multiplier     :      1.0000
Dilution       :      1.0000
Use Multiplier & Dilution Factor with ISTDs

```

Signal 1: DAD1 A, Sig=210,4 Ref=off

| Peak # | RetTime [min] | Type | Width [min] | Area [mAU*s] | Height [mAU] | Area %   |
|--------|---------------|------|-------------|--------------|--------------|----------|
| 1      | 15.798        | BB   | 0.2714      | 3376.19116   | 191.74646    | 100.0000 |

Totals :                    3376.19116  191.74646

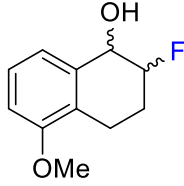

```

=====
Acq. Operator   : SYSTEM                      Seq. Line :    1
Sample Operator : SYSTEM
Acq. Instrument : LC                          Location  : P2-D-06
Injection Date  : 4/22/2022 10:43:49 AM      Inj       :    1
                                           Inj Volume: 1.000 µl
Different Inj Volume from Sample Entry! Actual Inj Volume : 0.500 µl
Acq. Method     : D:\ChemStation\1\Data\hb6\HB0510 2022-04-22 10-43-00\hb6_IF-3-90-10-1ML-
                  13min.M
Last changed    : 4/22/2022 10:43:37 AM by SYSTEM
                  (modified after loading)
Analysis Method : D:\ChemStation\1\Data\hb6\HB0510 2022-04-22 10-43-00\hb6_IF-3-90-10-1ML-
                  13min.M (Sequence Method)
Last changed    : 4/22/2022 11:45:29 AM by SYSTEM
                  (modified after loading)
Additional Info : Peak(s) manually integrated
=====

```

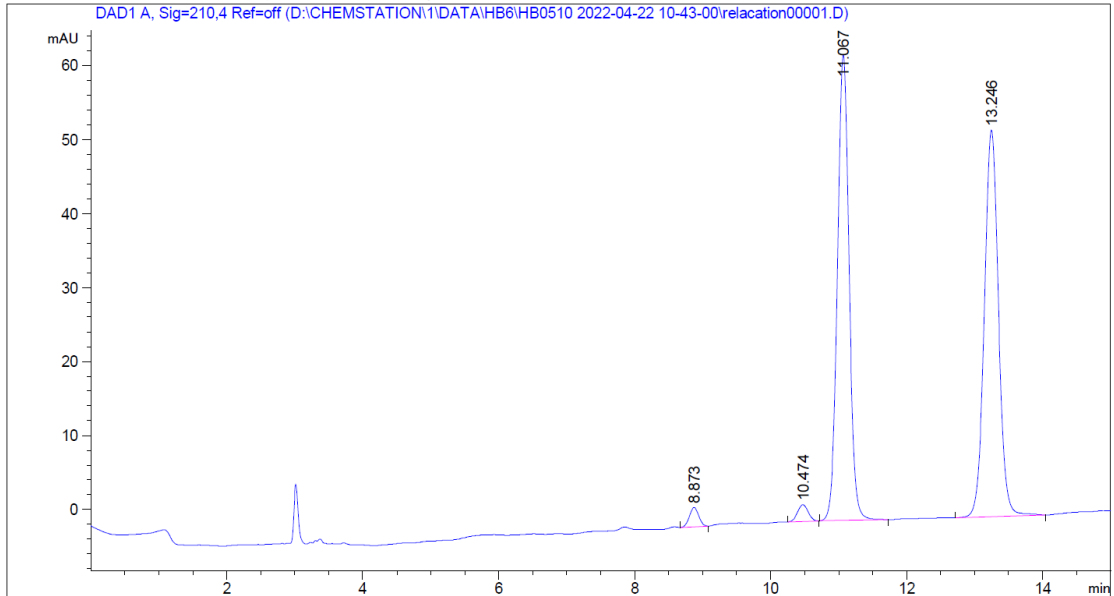

```

=====
                          Area Percent Report
=====

```

```

Sorted By      :      Signal
Multiplier     :      1.0000
Dilution      :      1.0000
Use Multiplier & Dilution Factor with ISTDs

```

Signal 1: DAD1 A, Sig=210,4 Ref=off

| Peak # | RetTime [min] | Type | Width [min] | Area [mAU*s] | Height [mAU] | Area % |
|--------|---------------|------|-------------|--------------|--------------|--------|
| 1      | 8.873         | BB   | 0.1448      | 24.19081     | 2.59424      | 1.5681 |
| 2      | 10.474        | BB   | 0.1685      | 24.03299     | 2.25277      | 1.5579 |

|   |        |    |        |           |          |         |
|---|--------|----|--------|-----------|----------|---------|
| 3 | 11.067 | BB | 0.1816 | 743.15253 | 62.99266 | 48.1724 |
| 4 | 13.246 | BB | 0.2197 | 751.31750 | 52.26147 | 48.7017 |

Totals : 1542.69382 120.10114

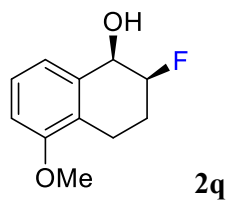



```

=====
Acq. Operator   : SYSTEM                      Seq. Line :    2
Sample Operator : SYSTEM
Acq. Instrument : LC                        Location  : P2-D-07
Injection Date  : 4/22/2022 10:59:38 AM      Inj       :    1
                                           Inj Volume: 1.000 µl
Different Inj Volume from Sample Entry! Actual Inj Volume : 0.500 µl
Acq. Method     : D:\ChemStation\1\Data\hb6\HB0510 2022-04-22 10-43-00\hb6_IF-3-90-10-1ML-
                  13min.M
Last changed    : 4/22/2022 10:43:37 AM by SYSTEM
Analysis Method : D:\ChemStation\1\Data\hb6\HB0510 2022-04-22 10-43-00\hb6_IF-3-90-10-1ML-
                  13min.M (Sequence Method)
Last changed    : 4/22/2022 11:45:29 AM by SYSTEM
                  (modified after loading)
Additional Info  : Peak(s) manually integrated

```

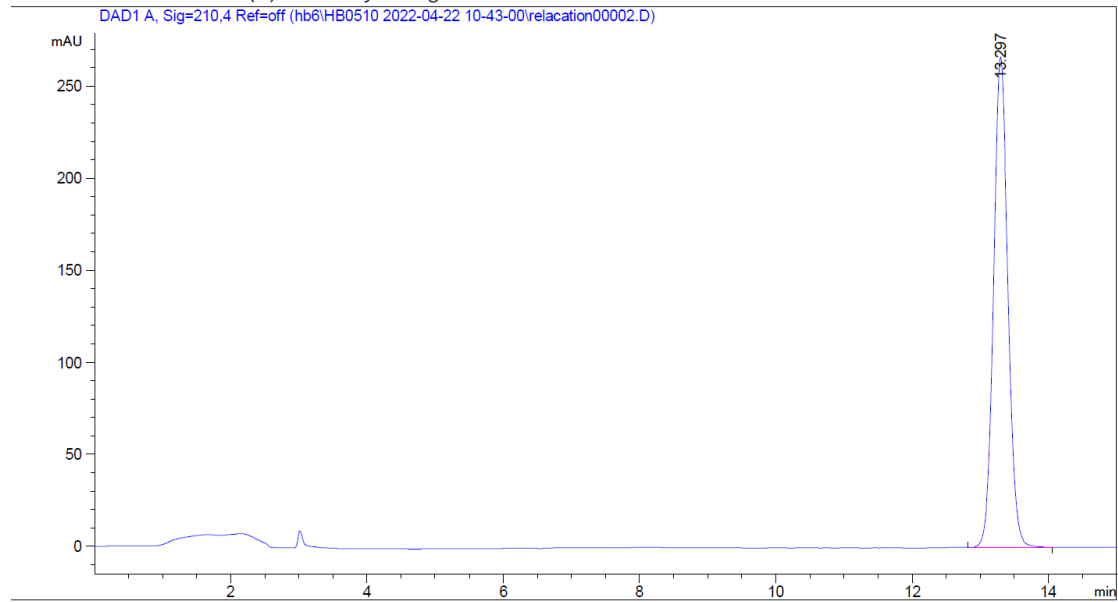

=====  
Area Percent Report  
=====

```

Sorted By      :      Signal
Multiplier     :      1.0000
Dilution      :      1.0000
Use Multiplier & Dilution Factor with ISTDs

```

Signal 1: DAD1 A, Sig=210,4 Ref=off

| Peak # | RetTime [min] | Type | Width [min] | Area [mAU*s] | Height [mAU] | Area %   |
|--------|---------------|------|-------------|--------------|--------------|----------|
| 1      | 13.297        | BB   | 0.2244      | 3886.76196   | 266.11545    | 100.0000 |

Totals :                    3886.76196   266.11545

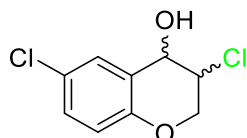

```

=====
Acq. Operator   : SYSTEM                               Seq. Line :    2
Sample Operator : SYSTEM
Acq. Instrument : LC                                 Location  : P1-F-03
Injection Date  : 4/28/2022 3:55:29 PM              Inj       :    1
                                                    Inj Volume: 1.000 µl
Acq. Method    : D:\ChemStation\1\Data\hb6\HB0509 2022-04-28 15-41-42\hb6_IE-3-90-10-1ML-
10min.M
Last changed   : 4/28/2022 3:41:56 PM by SYSTEM
Analysis Method: D:\ChemStation\1\Data\hb6\HB0509 2022-04-28 15-41-42\hb6_IE-3-90-10-1ML-
10min.M (Sequence Method)
Last changed   : 4/28/2022 4:09:10 PM by SYSTEM
                (modified after loading)
Additional Info : Peak(s) manually integrated

```

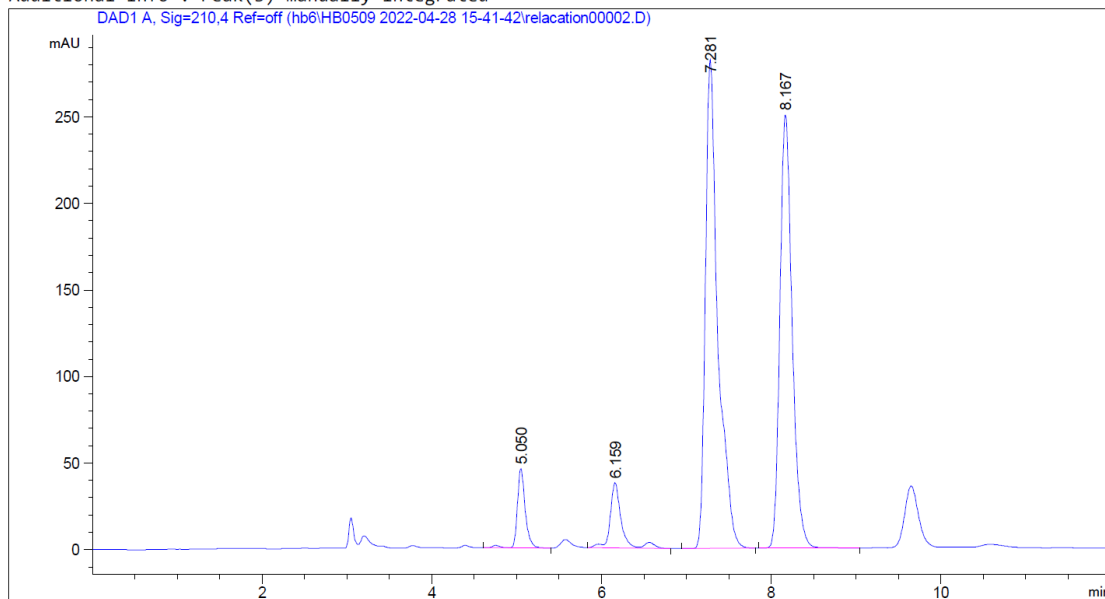

```

=====
                          Area Percent Report
=====

```

```

Sorted By      : Signal
Multiplier     : 1.0000
Dilution      : 1.0000
Use Multiplier & Dilution Factor with ISTDs

```

Signal 1: DAD1 A, Sig=210,4 Ref=off

| Peak # | RetTime [min] | Type | Width [min] | Area [mAU*s] | Height [mAU] | Area %  |
|--------|---------------|------|-------------|--------------|--------------|---------|
| 1      | 5.050         | VB R | 0.0957      | 297.97076    | 45.73538     | 4.9404  |
| 2      | 6.159         | VV R | 0.1221      | 352.60867    | 37.67241     | 5.8463  |
| 3      | 7.281         | BB   | 0.1490      | 2881.44800   | 282.57953    | 47.7751 |
| 4      | 8.167         | BB   | 0.1524      | 2499.24805   | 250.47849    | 41.4381 |

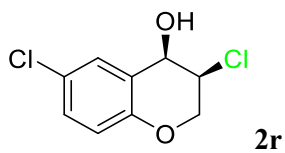

```

=====
Acq. Operator   : SYSTEM                      Seq. Line :    1
Sample Operator : SYSTEM
Acq. Instrument : LC                          Location  : P1-F-02
Injection Date  : 4/28/2022 3:42:35 PM       Inj       :    1
                                           Inj Volume: 1.000 µl

Acq. Method     : D:\ChemStation\1\Data\hb6\HB0509 2022-04-28 15-41-42\hb6_IE-3-90-10-1ML-
10min.M
Last changed    : 4/28/2022 3:41:56 PM by SYSTEM
(modified after loading)
Analysis Method : D:\ChemStation\1\Data\hb6\HB0509 2022-04-28 15-41-42\hb6_IE-3-90-10-1ML-
10min.M (Sequence Method)
Last changed    : 4/28/2022 4:09:10 PM by SYSTEM
(modified after loading)
Additional Info  : Peak(s) manually integrated

```

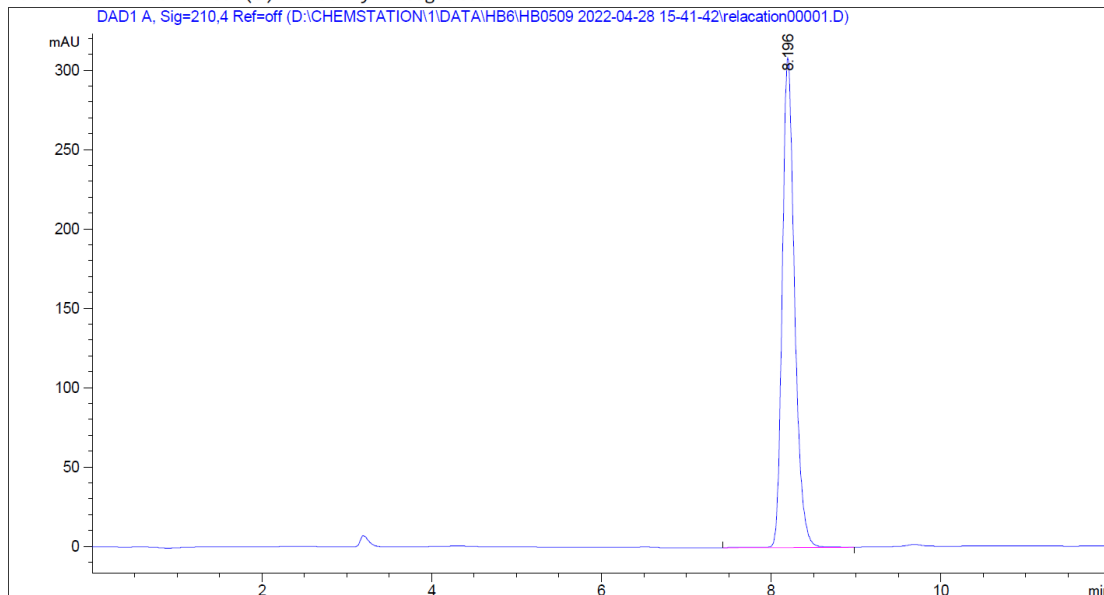

```

=====
                          Area Percent Report
=====

```

```

Sorted By      :      Signal
Multiplier     :      1.0000
Dilution      :      1.0000
Use Multiplier & Dilution Factor with ISTDs

```

Signal 1: DAD1 A, Sig=210,4 Ref=off

| Peak # | RetTime [min] | Type | Width [min] | Area [mAU*s] | Height [mAU] | Area %   |
|--------|---------------|------|-------------|--------------|--------------|----------|
| 1      | 8.196         | BB   | 0.1533      | 3099.71191   | 308.38446    | 100.0000 |

```
Totals :                3099.71191  308.38446
```

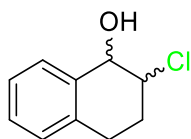

```

=====
Acq. Operator   : SYSTEM                      Seq. Line :    1
Sample Operator : SYSTEM
Acq. Instrument : LC                        Location  : P1-A-01
Injection Date  : 1/12/2022 9:12:18 AM      Inj       :    1
                                           Inj Volume: 1.000 µl
Acq. Method     : D:\ChemStation\1\Data\SongJY\HB0433 2022-01-12 09-11-26\hb6_IF-3-90-10-1ML-
                  13min.M
Last changed    : 1/12/2022 9:06:58 AM by SYSTEM
Analysis Method : D:\ChemStation\1\Data\SongJY\HB0433 2022-01-12 09-11-26\hb6_IF-3-90-10-1ML-
                  13min.M (Sequence Method)
Last changed    : 4/15/2022 12:03:38 PM by SYSTEM
                  (modified after loading)
Additional Info  : Peak(s) manually integrated

```

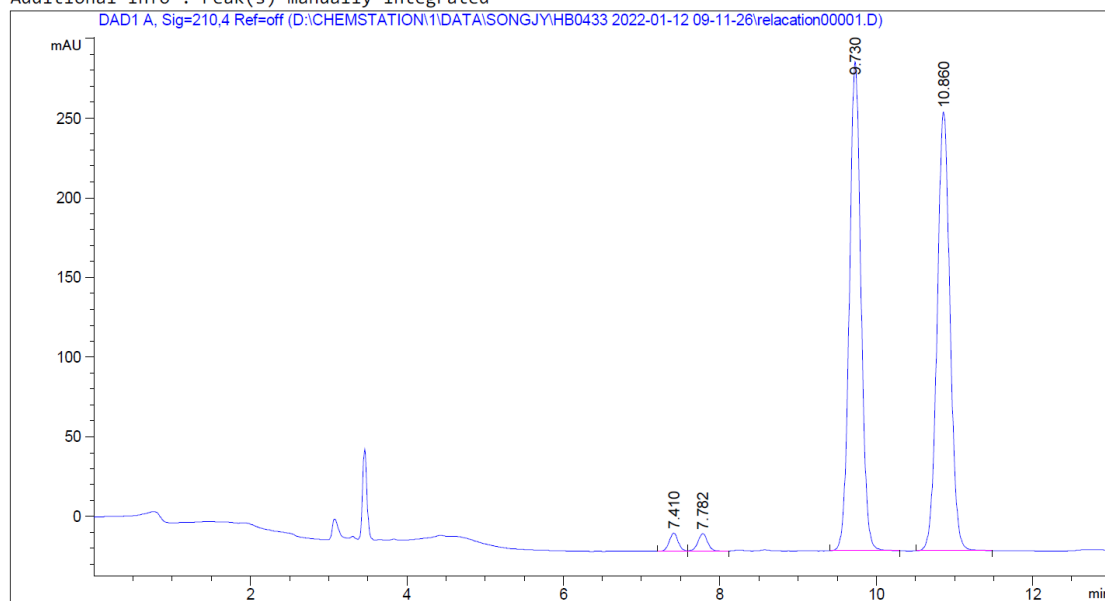

```

=====
                          Area Percent Report
=====

```

```

Sorted By      :      Signal
Multiplier     :      1.0000
Dilution      :      1.0000
Use Multiplier & Dilution Factor with ISTDs

```

Signal 1: DAD1 A, Sig=210,4 Ref=off

| Peak # | RetTime [min] | Type | Width [min] | Area [mAU*s] | Height [mAU] | Area %  |
|--------|---------------|------|-------------|--------------|--------------|---------|
| 1      | 7.410         | BV   | 0.1256      | 91.02695     | 11.34294     | 1.4042  |
| 2      | 7.782         | VV   | 0.1324      | 94.88305     | 11.02155     | 1.4637  |
| 3      | 9.730         | BB   | 0.1596      | 3148.05786   | 307.07074    | 48.5631 |
| 4      | 10.860        | BB   | 0.1753      | 3148.43286   | 275.60364    | 48.5689 |

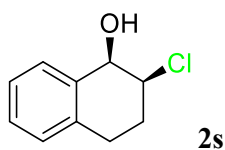

```

=====
Acq. Operator   : SYSTEM                      Seq. Line :    2
Sample Operator : SYSTEM
Acq. Instrument : LC                        Location  : P1-A-02
Injection Date  : 1/12/2022 9:26:09 AM      Inj       :    1
                                           Inj Volume: 1.000 µl

Acq. Method    : D:\ChemStation\1\Data\SongJY\HB0433 2022-01-12 09-11-26\hb6_IF-3-90-10-1ML-
                13min.M
Last changed   : 1/12/2022 9:06:58 AM by SYSTEM
Analysis Method : D:\ChemStation\1\Data\SongJY\HB0433 2022-01-12 09-11-26\hb6_IF-3-90-10-1ML-
                13min.M (Sequence Method)
Last changed   : 4/15/2022 12:01:16 PM by SYSTEM
                (modified after loading)
Additional Info : Peak(s) manually integrated
  
```

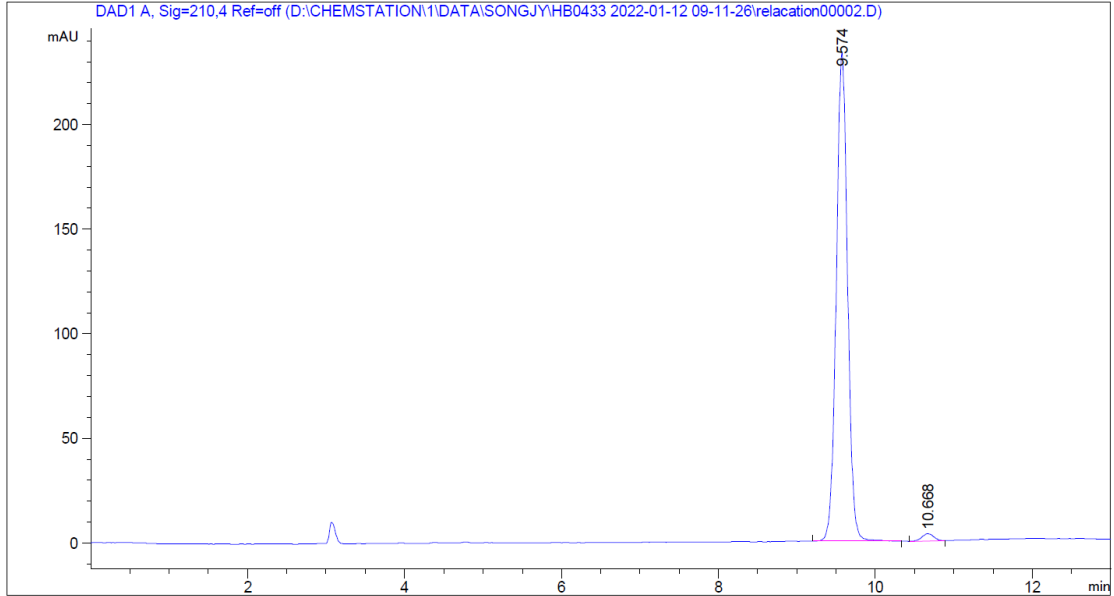

=====  
Area Percent Report  
=====

```

Sorted By      :      Signal
Multiplier     :      1.0000
Dilution       :      1.0000
Use Multiplier & Dilution Factor with ISTDs
  
```

Signal 1: DAD1 A, Sig=210,4 Ref=off

| Peak # | RetTime [min] | Type | Width [min] | Area [mAU*s] | Height [mAU] | Area %  |
|--------|---------------|------|-------------|--------------|--------------|---------|
| 1      | 9.574         | BB   | 0.1546      | 2335.41016   | 233.63559    | 98.4418 |
| 2      | 10.668        | BB   | 0.1607      | 36.96539     | 3.51414      | 1.5582  |

Totals :                                    2372.37554   237.14973

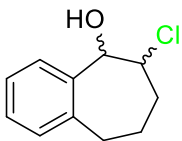

```

=====
Acq. Operator   : SYSTEM                      Seq. Line :    3
Sample Operator : SYSTEM
Acq. Instrument : LC                        Location  : P1-F-02
Injection Date  : 6/29/2022 9:27:14 AM      Inj       :    1
                                           Inj Volume: 1.000 µl
Acq. Method     : D:\ChemStation\1\Data\hb6\hb0461 2022-06-29 08-56-26\hb6_IF-3-95-5-1ML-
                                           20min.M
Last changed    : 6/29/2022 9:24:07 AM by SYSTEM
Analysis Method : D:\ChemStation\1\Data\hb6\hb0461 2022-06-29 08-56-26\hb6_IF-3-95-5-1ML-
                                           20min.M (Sequence Method)
Last changed    : 6/29/2022 11:24:12 AM by SYSTEM
Additional Info  : Peak(s) manually integrated

```

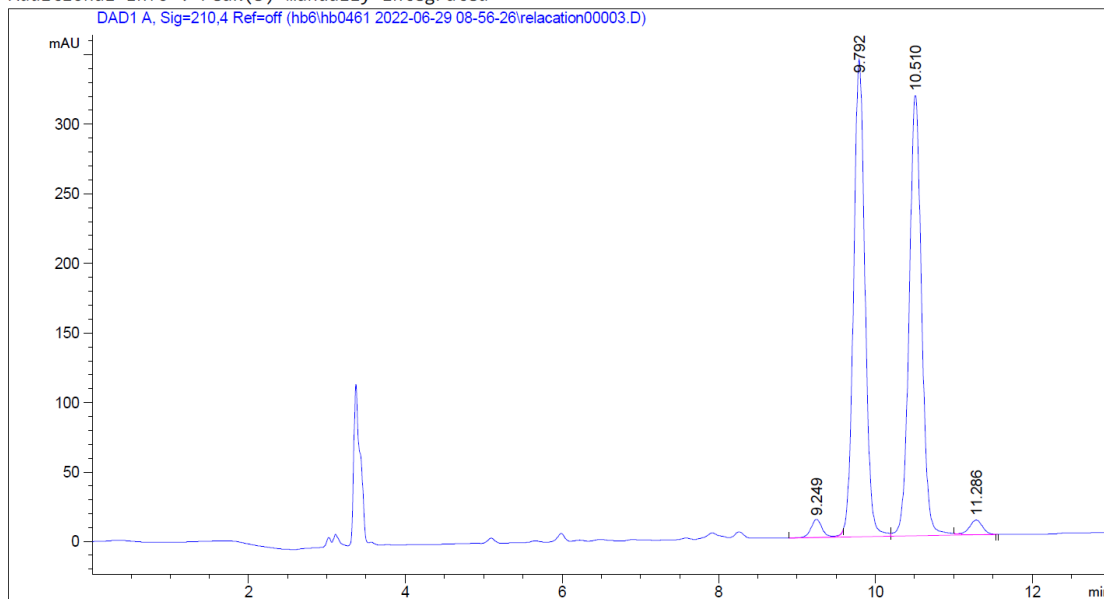

```

=====
                          Area Percent Report
=====

```

```

Sorted By      :      Signal
Multiplier     :      1.0000
Dilution       :      1.0000
Use Multiplier & Dilution Factor with ISTDs

```

Signal 1: DAD1 A, Sig=210,4 Ref=off

| Peak # | RetTime [min] | Type | Width [min] | Area [mAU*s] | Height [mAU] | Area %  |
|--------|---------------|------|-------------|--------------|--------------|---------|
| 1      | 9.249         | BV E | 0.1549      | 133.74602    | 13.11970     | 1.8528  |
| 2      | 9.792         | VV R | 0.1559      | 3470.34570   | 343.31000    | 48.0744 |
| 3      | 10.510        | VV R | 0.1688      | 3497.50146   | 316.83517    | 48.4506 |
| 4      | 11.286        | VB E | 0.1742      | 117.10435    | 10.33564     | 1.6222  |

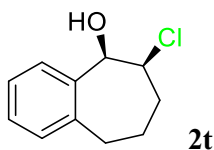

```

=====
Acq. Operator   : SYSTEM                      Seq. Line :    2
Sample Operator : SYSTEM
Acq. Instrument : LC                        Location  : P1-F-01
Injection Date  : 6/29/2022 9:13:21 AM      Inj       :    1
                                           Inj Volume: 1.000 µl
Different Inj Volume from Sample Entry! Actual Inj Volume : 0.500 µl
Acq. Method     : D:\ChemStation\1\Data\hb6\hb0461 2022-06-29 08-56-26\hb6_IF-3-95-5-1ML-
                20min.M
Last changed    : 6/29/2022 9:24:07 AM by SYSTEM
                (modified after loading)
Analysis Method : D:\ChemStation\1\Data\hb6\hb0461 2022-06-29 08-56-26\hb6_IF-3-95-5-1ML-
                20min.M (Sequence Method)
Last changed    : 6/29/2022 10:04:20 AM by SYSTEM
                (modified after loading)
Additional Info : Peak(s) manually integrated

```

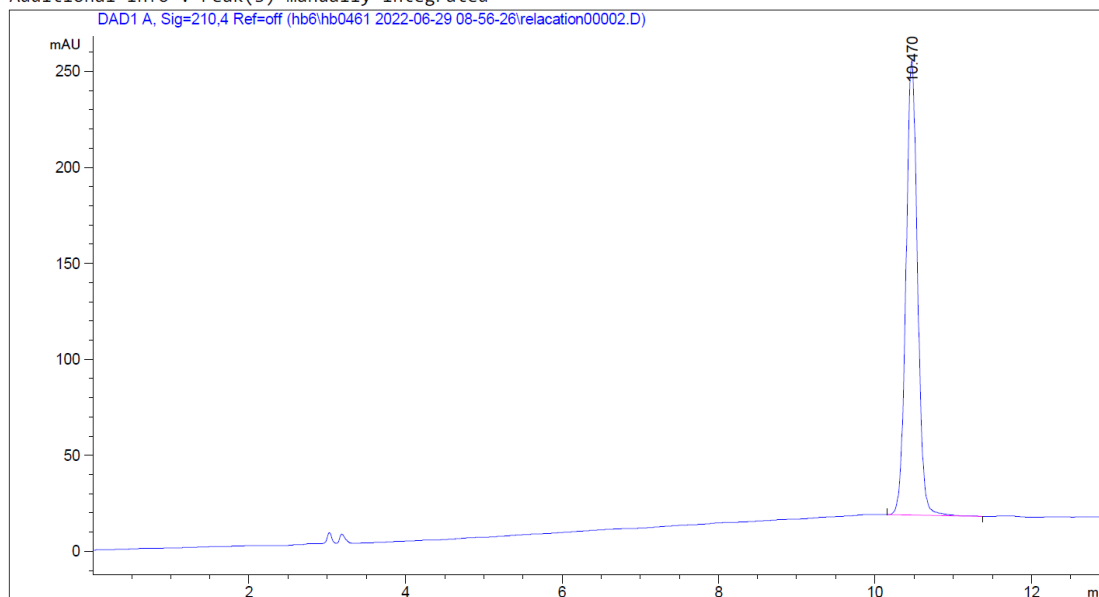

```

=====
                          Area Percent Report
=====

```

```

Sorted By      : Signal
Multiplier     : 1.0000
Dilution      : 1.0000
Use Multiplier & Dilution Factor with ISTDs

```

Signal 1: DAD1 A, Sig=210,4 Ref=off

| Peak # | RetTime [min] | Type | Width [min] | Area [mAU*s] | Height [mAU] | Area %   |
|--------|---------------|------|-------------|--------------|--------------|----------|
| 1      | 10.470        | BB   | 0.1581      | 2437.30005   | 236.78580    | 100.0000 |

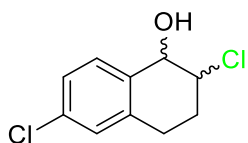

```

=====
Acq. Operator   : SYSTEM                      Seq. Line :    4
Sample Operator : SYSTEM
Acq. Instrument : LC                        Location  : P2-D-10
Injection Date  : 4/18/2022 11:35:50 AM     Inj       :    1
                                           Inj Volume: 1.000 µl

Acq. Method     : D:\ChemStation\1\Data\hb6\HB0501-502 2022-04-18 10-37-31\hb6_IF-3-90-10-1ML
                  -13min.M
Last changed    : 4/18/2022 11:21:39 AM by SYSTEM
Analysis Method : D:\ChemStation\1\Data\hb6\HB0501-502 2022-04-18 10-37-31\hb6_IF-3-90-10-1ML
                  -13min.M (Sequence Method)
Last changed    : 4/18/2022 11:51:59 AM by SYSTEM
                  (modified after loading)
Additional Info : Peak(s) manually integrated

```

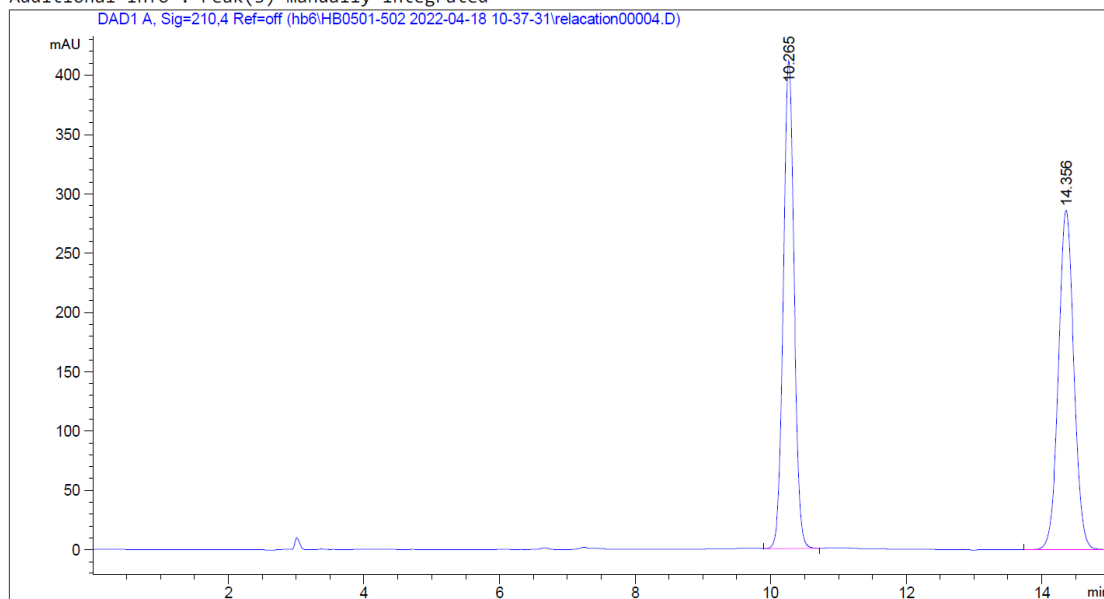

=====  
Area Percent Report  
=====

```

Sorted By      : Signal
Multiplier     : 1.0000
Dilution      : 1.0000
Use Multiplier & Dilution Factor with ISTDs

```

Signal 1: DAD1 A, Sig=210,4 Ref=off

| Peak # | RetTime [min] | Type | Width [min] | Area [mAU*s] | Height [mAU] | Area %  |
|--------|---------------|------|-------------|--------------|--------------|---------|
| 1      | 10.265        | BB   | 0.1681      | 4514.69922   | 411.14957    | 49.9390 |
| 2      | 14.356        | BBA  | 0.2444      | 4525.73145   | 286.30136    | 50.0610 |

Totals :                    9040.43066   697.45093

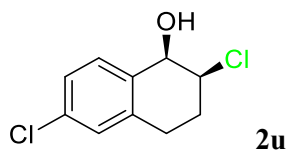



```

=====
Acq. Operator   : SYSTEM                      Seq. Line :    3
Sample Operator : SYSTEM
Acq. Instrument : LC                        Location  : P2-D-09
Injection Date  : 4/18/2022 11:19:59 AM      Inj       :    1
                                           Inj Volume: 1.000 µl

Acq. Method     : D:\ChemStation\1\Data\hb6\HB0501-502 2022-04-18 10-37-31\hb6_IF-3-90-10-1ML
                  -13min.M
Last changed    : 4/18/2022 11:21:39 AM by SYSTEM
                  (modified after loading)
Analysis Method : D:\ChemStation\1\Data\hb6\HB0501-502 2022-04-18 10-37-31\hb6_IF-3-90-10-1ML
                  -13min.M (Sequence Method)
Last changed    : 4/18/2022 11:51:59 AM by SYSTEM
                  (modified after loading)
Additional Info : Peak(s) manually integrated

```

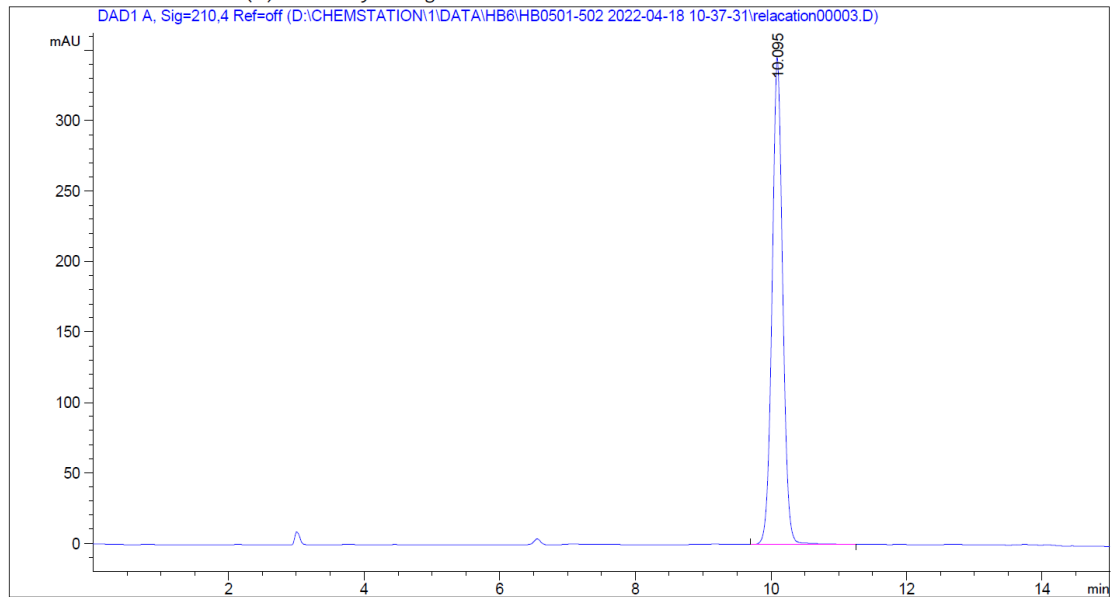

```

=====
                          Area Percent Report
=====

```

```

Sorted By      :      Signal
Multiplier     :      1.0000
Dilution      :      1.0000
Use Multiplier & Dilution Factor with ISTDs

```

Signal 1: DAD1 A, Sig=210,4 Ref=off

| Peak # | RetTime [min] | Type | Width [min] | Area [mAU*s] | Height [mAU] | Area %   |
|--------|---------------|------|-------------|--------------|--------------|----------|
| 1      | 10.095        | BB   | 0.1699      | 3791.14063   | 345.81458    | 100.0000 |

Totals :                    3791.14063   345.81458

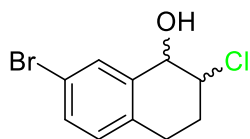

```

=====
Acq. Operator   : SYSTEM                      Seq. Line :    6
Sample Operator : SYSTEM
Acq. Instrument : LC                        Location  : P2-E-01
Injection Date  : 4/18/2022 12:07:33 PM      Inj       :    1
                                                Inj Volume: 1.000 µl

Acq. Method     : D:\ChemStation\1\Data\hb6\HB0501-502 2022-04-18 10-37-31\hb6_IF-3-90-10-1ML
                  -13min.M
Last changed    : 4/18/2022 11:21:39 AM by SYSTEM
Analysis Method : D:\ChemStation\1\Data\hb6\HB0501-502 2022-04-18 10-37-31\hb6_IF-3-90-10-1ML
                  -13min.M (Sequence Method)
Last changed    : 4/18/2022 12:29:43 PM by SYSTEM
                  (modified after loading)
Additional Info : Peak(s) manually integrated

```

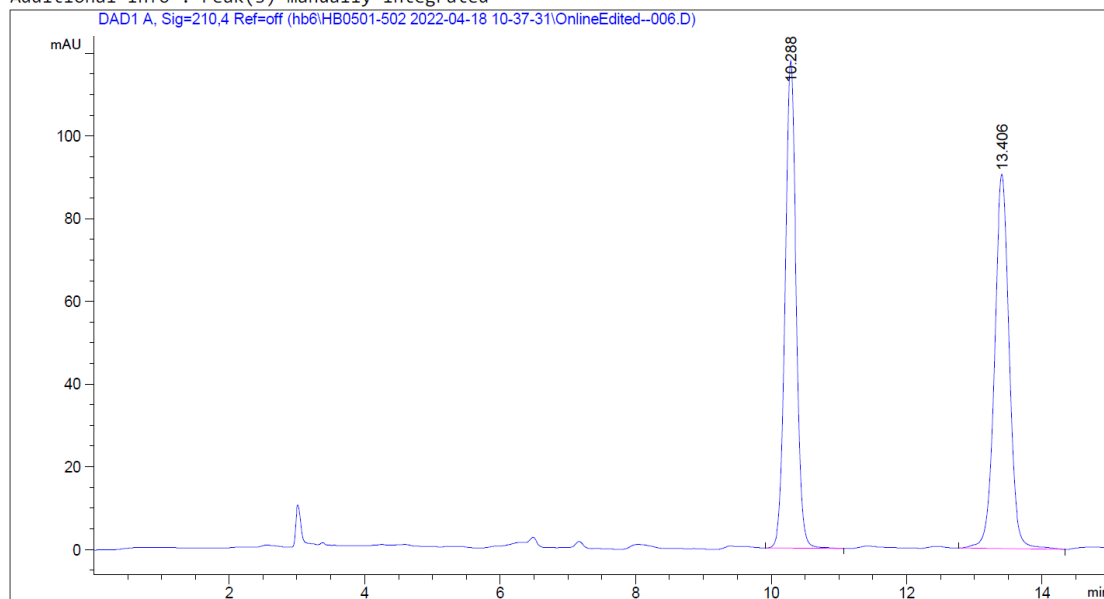

Area Percent Report

```

Sorted By      : Signal
Multiplier     : 1.0000
Dilution       : 1.0000
Use Multiplier & Dilution Factor with ISTDs

```

Signal 1: DAD1 A, Sig=210,4 Ref=off

| Peak # | RetTime [min] | Type | Width [min] | Area [mAU*s] | Height [mAU] | Area %  |
|--------|---------------|------|-------------|--------------|--------------|---------|
| 1      | 10.288        | BB   | 0.1737      | 1329.18738   | 117.76014    | 49.3727 |
| 2      | 13.406        | BB   | 0.2298      | 1362.96106   | 90.44734     | 50.6273 |

Totals : 2692.14844 208.20748

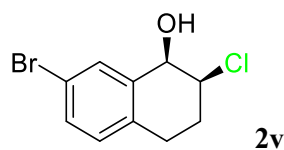

```

=====
Acq. Operator   : SYSTEM                      Seq. Line :    5
Sample Operator : SYSTEM
Acq. Instrument : LC                        Location  : P2-D-11
Injection Date  : 4/18/2022 11:51:41 AM      Inj       :    1
                                           Inj Volume: 1.000 µl
Acq. Method     : D:\ChemStation\1\Data\hb6\HB0501-502 2022-04-18 10-37-31\hb6_IF-3-90-10-1ML
                  -13min.M
Last changed    : 4/18/2022 11:21:39 AM by SYSTEM
Analysis Method : D:\ChemStation\1\Data\hb6\HB0501-502 2022-04-18 10-37-31\hb6_IF-3-90-10-1ML
                  -13min.M (Sequence Method)
Last changed    : 4/18/2022 12:29:43 PM by SYSTEM
                  (modified after loading)
Additional Info : Peak(s) manually integrated

```

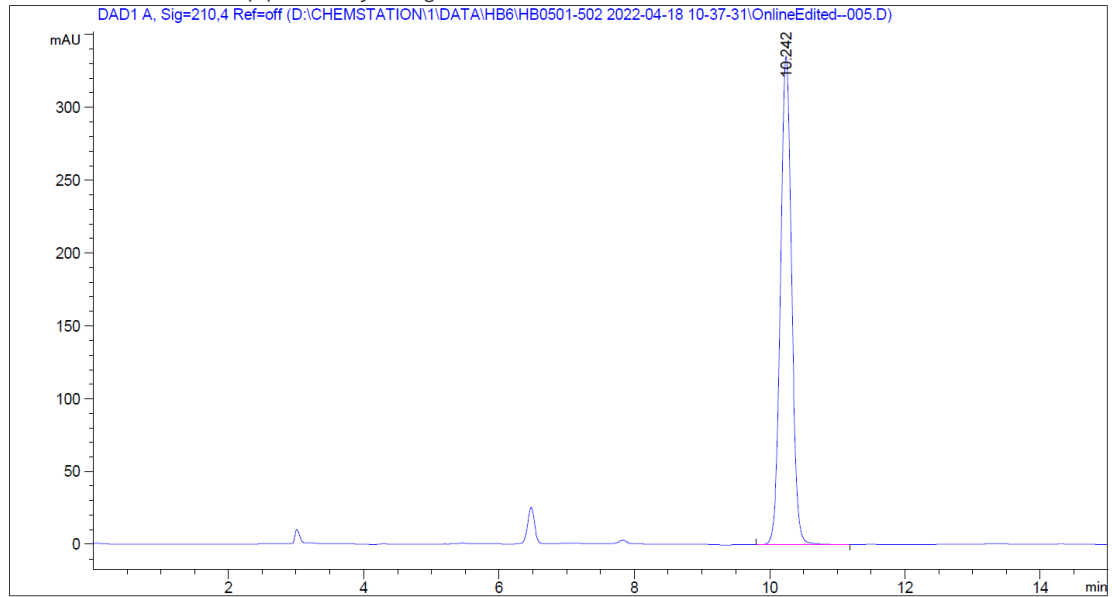

```

=====
                          Area Percent Report
=====

```

```

Sorted By      :      Signal
Multiplier     :      1.0000
Dilution      :      1.0000
Use Multiplier & Dilution Factor with ISTDs

```

Signal 1: DAD1 A, Sig=210,4 Ref=off

| Peak # | RetTime [min] | Type | Width [min] | Area [mAU*s] | Height [mAU] | Area %   |
|--------|---------------|------|-------------|--------------|--------------|----------|
| 1      | 10.242        | BB   | 0.1744      | 3807.09180   | 335.41757    | 100.0000 |

```
Totals :                3807.09180  335.41757
```

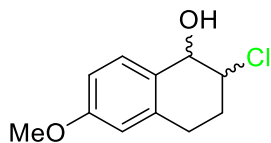

```

=====
Acq. Operator   : SYSTEM                      Seq. Line :    2
Sample Operator : SYSTEM
Acq. Instrument : LC                        Location  : P2-D-08
Injection Date  : 4/18/2022 10:59:10 AM      Inj       :    1
                                           Inj Volume: 1.000 µl

Acq. Method     : D:\ChemStation\1\Data\hb6\HB0501-502 2022-04-18 10-37-31\hb6_IF-3-90-10-1ML
                  -13min.M
Last changed    : 4/18/2022 10:38:11 AM by SYSTEM
Analysis Method : D:\ChemStation\1\Data\hb6\HB0501-502 2022-04-18 10-37-31\hb6_IF-3-90-10-1ML
                  -13min.M (Sequence Method)
Last changed    : 4/18/2022 11:20:02 AM by SYSTEM
                  (modified after loading)
Additional Info : Peak(s) manually integrated

```

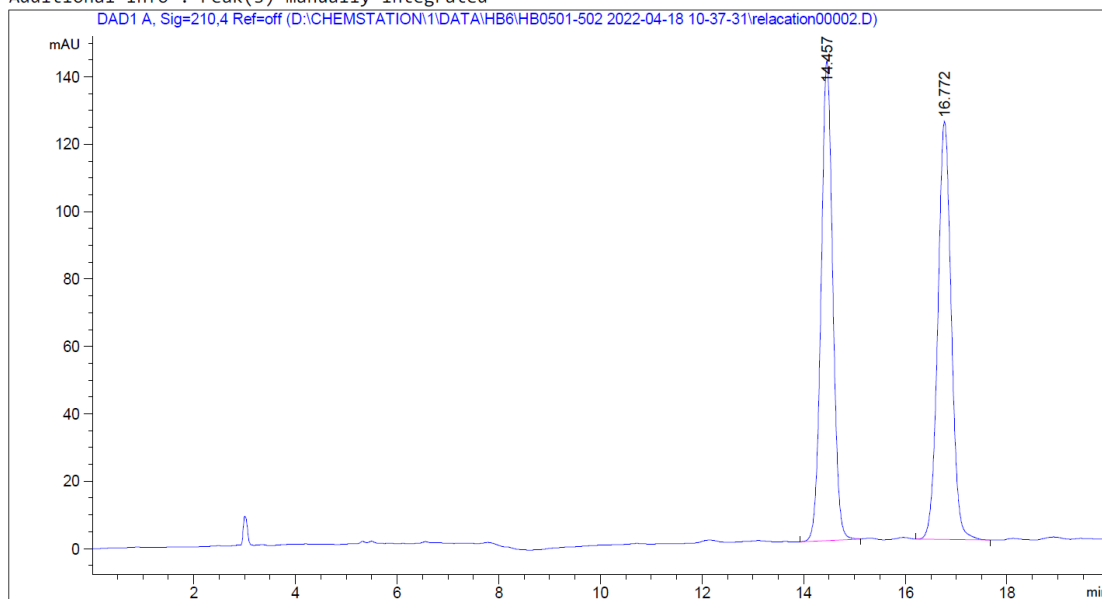

=====  
Area Percent Report  
=====

```

Sorted By      :      Signal
Multiplier     :      1.0000
Dilution      :      1.0000
Use Multiplier & Dilution Factor with ISTDs

```

Signal 1: DAD1 A, Sig=210,4 Ref=off

| Peak # | RetTime [min] | Type | Width [min] | Area [mAU*s] | Height [mAU] | Area %  |
|--------|---------------|------|-------------|--------------|--------------|---------|
| 1      | 14.457        | BB   | 0.2451      | 2257.44897   | 142.31580    | 49.7195 |
| 2      | 16.772        | BB   | 0.2848      | 2282.92114   | 124.00315    | 50.2805 |

Totals :                    4540.37012  266.31895

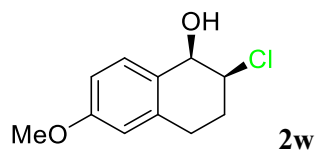

```

=====
Acq. Operator   : SYSTEM                      Seq. Line :    1
Sample Operator : SYSTEM
Acq. Instrument : LC                        Location  : P2-D-07
Injection Date  : 4/18/2022 10:38:21 AM      Inj       :    1
                                           Inj Volume: 1.000 µl

Acq. Method     : D:\ChemStation\1\Data\hb6\HB0501-502 2022-04-18 10-37-31\hb6_IF-3-90-10-1ML
                  -13min.M
Last changed    : 4/18/2022 10:38:11 AM by SYSTEM
                  (modified after loading)
Analysis Method : D:\ChemStation\1\Data\hb6\HB0501-502 2022-04-18 10-37-31\hb6_IF-3-90-10-1ML
                  -13min.M (Sequence Method)
Last changed    : 4/18/2022 11:20:02 AM by SYSTEM
                  (modified after loading)
Additional Info  : Peak(s) manually integrated
  
```

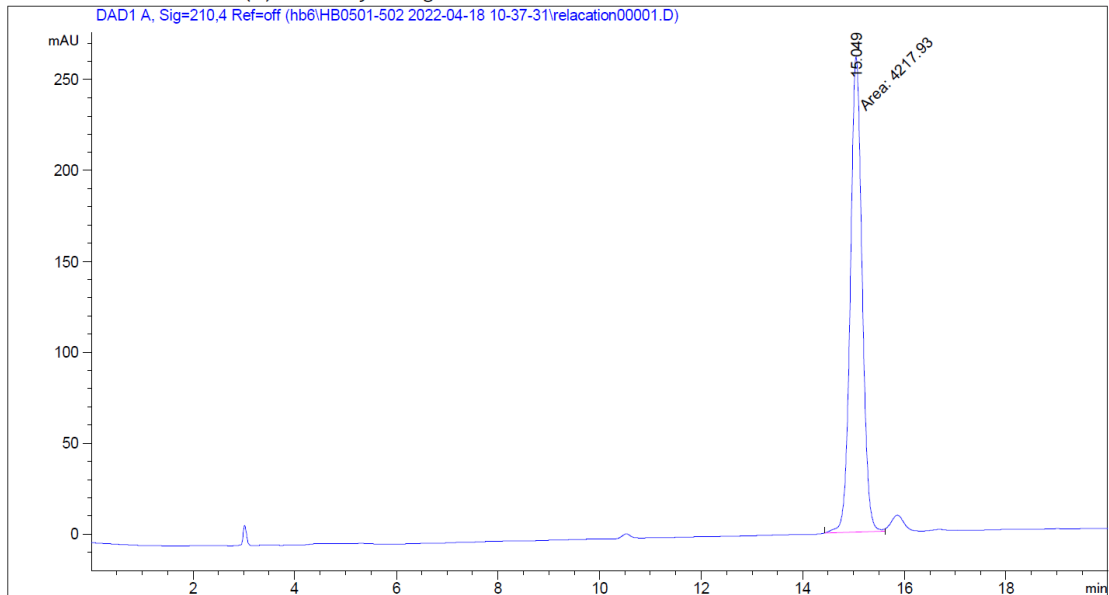

=====  
Area Percent Report  
=====

```

Sorted By      :      Signal
Multiplier     :      1.0000
Dilution      :      1.0000
Use Multiplier & Dilution Factor with ISTDs
  
```

Signal 1: DAD1 A, Sig=210,4 Ref=off

| Peak # | RetTime [min] | Type | Width [min] | Area [mAU*s] | Height [mAU] | Area %   |
|--------|---------------|------|-------------|--------------|--------------|----------|
| 1      | 15.049        | MM   | 0.2687      | 4217.93457   | 261.65979    | 100.0000 |

Totals :                    4217.93457  261.65979

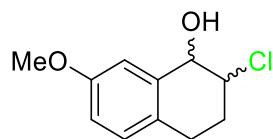

```

=====
Acq. Operator   : SYSTEM                      Seq. Line :    9
Sample Operator : SYSTEM
Acq. Instrument : LC                        Location  : P2-D-09
Injection Date  : 4/21/2022 11:08:36 AM      Inj       :    1
                                           Inj Volume: 1.000 µl
Different Inj Volume from Sample Entry! Actual Inj Volume : 0.500 µl
Acq. Method     : D:\ChemStation\1\Data\hb6\hb0500-507 2022-04-21 08-55-12\hb6_IF-3-90-10-1ML
                                           -13min.M
Last changed    : 4/21/2022 11:25:25 AM by SYSTEM
                                           (modified after loading)
Analysis Method : D:\ChemStation\1\Data\hb6\hb0500-507 2022-04-21 08-55-12\hb6_IF-3-90-10-1ML
                                           -13min.M (Sequence Method)
Last changed    : 4/21/2022 11:49:00 AM by SYSTEM
                                           (modified after loading)
Additional Info  : Peak(s) manually integrated

```

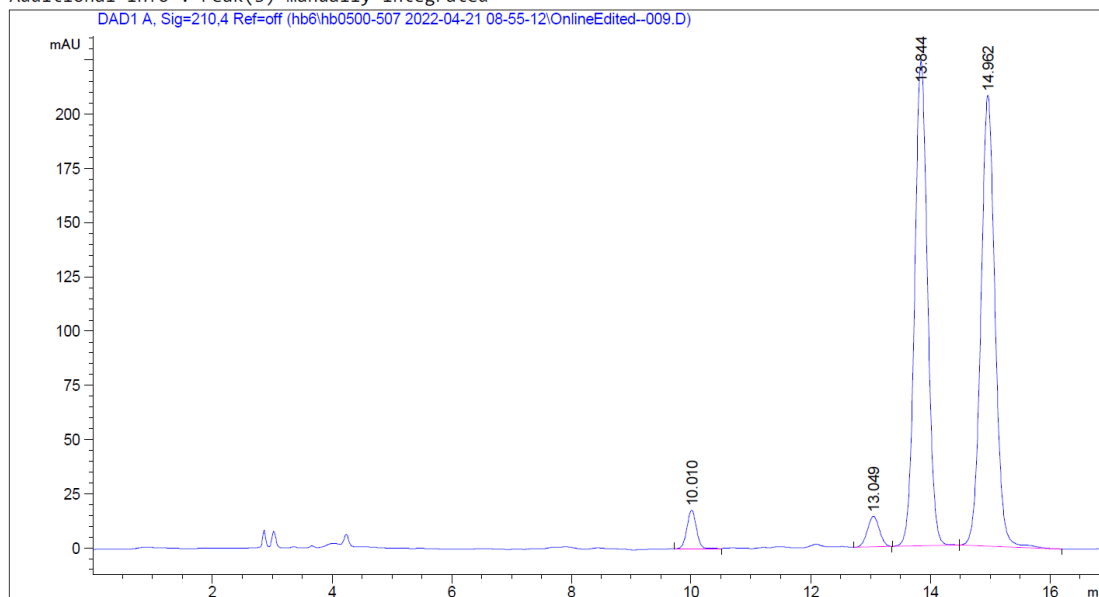

Area Percent Report

```

Sorted By      : Signal
Multiplier     : 1.0000
Dilution      : 1.0000
Use Multiplier & Dilution Factor with ISTDs

```

Signal 1: DAD1 A, Sig=210,4 Ref=off

| Peak # | RetTime [min] | Type | Width [min] | Area [mAU*s] | Height [mAU] | Area %  |
|--------|---------------|------|-------------|--------------|--------------|---------|
| 1      | 10.010        | BB   | 0.1689      | 193.66286    | 17.80045     | 2.7251  |
| 2      | 13.049        | BB   | 0.2161      | 195.89513    | 14.09885     | 2.7565  |
| 3      | 13.844        | BB   | 0.2294      | 3323.16797   | 223.61839    | 46.7612 |
| 4      | 14.962        | BB   | 0.2505      | 3393.94580   | 207.81985    | 47.7572 |

Totals : 7106.67175 463.33755

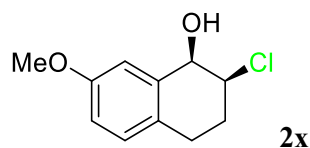

```

=====
Acq. Operator   : SYSTEM                      Seq. Line :   10
Sample Operator : SYSTEM
Acq. Instrument : LC                        Location  : P2-D-02
Injection Date  : 4/21/2022 11:26:26 AM      Inj       :    1
                                           Inj Volume: 1.000 µl
Different Inj Volume from Sample Entry! Actual Inj Volume : 0.500 µl
Acq. Method     : D:\ChemStation\1\Data\hb6\hb0500-507 2022-04-21 08-55-12\hb6_IF-3-90-10-1ML
                  -13min.M
Last changed    : 4/21/2022 11:25:25 AM by SYSTEM
Analysis Method : D:\ChemStation\1\Data\hb6\hb0500-507 2022-04-21 08-55-12\hb6_IF-3-90-10-1ML
                  -13min.M (Sequence Method)
Last changed    : 4/21/2022 11:49:00 AM by SYSTEM
                  (modified after loading)
Additional Info : Peak(s) manually integrated

```

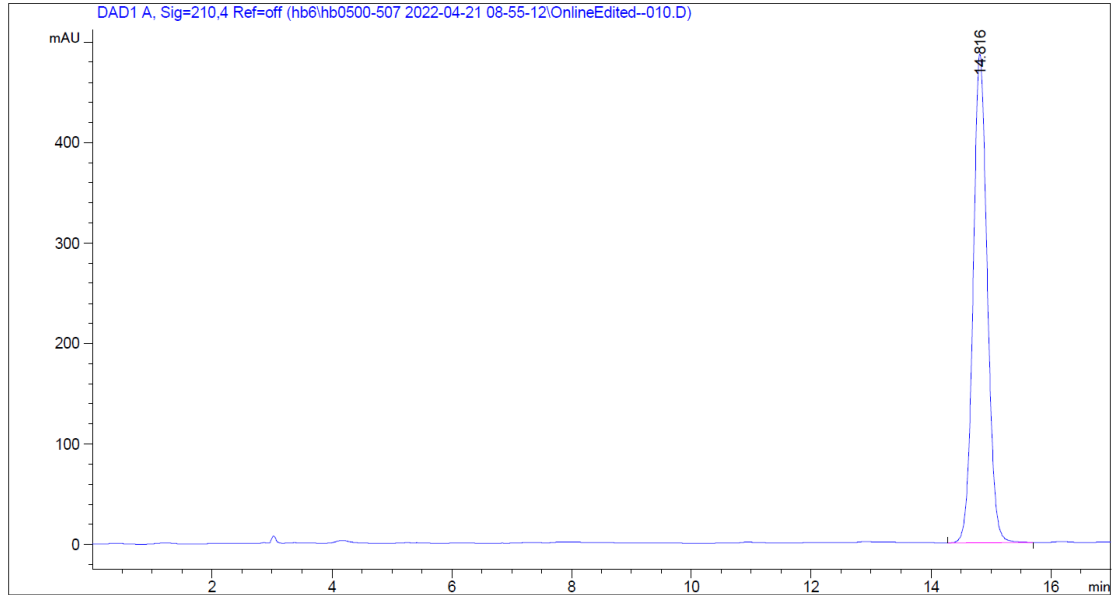

=====  
Area Percent Report  
=====

```

Sorted By      : Signal
Multiplier     : 1.0000
Dilution       : 1.0000
Use Multiplier & Dilution Factor with ISTDs

```

Signal 1: DAD1 A, Sig=210,4 Ref=off

| Peak # | RetTime [min] | Type | Width [min] | Area [mAU*s] | Height [mAU] | Area %   |
|--------|---------------|------|-------------|--------------|--------------|----------|
| 1      | 14.816        | BB   | 0.2508      | 7959.64355   | 486.61734    | 100.0000 |

Totals :                    7959.64355  486.61734

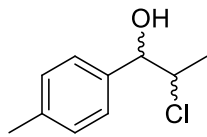







## 7. Crystallographic Information

The Crystallographic data of compound **2n** has been deposited in CCDC with number 2175167 and has been displayed at 50% ellipsoid contour probability level.

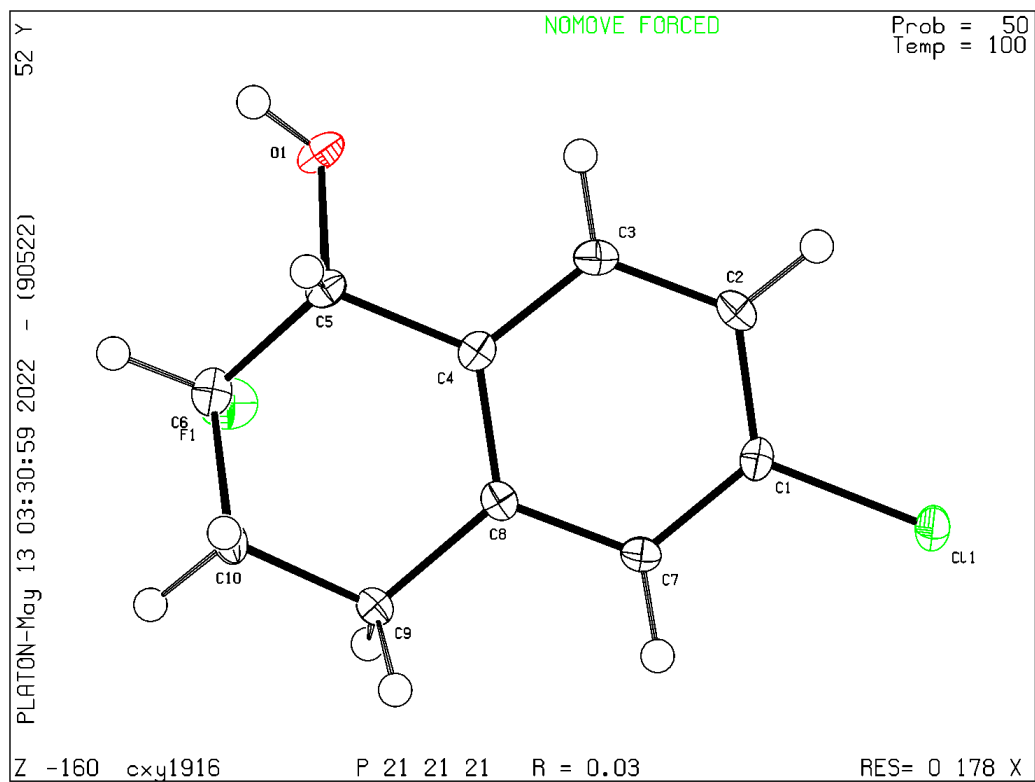

The Crystallographic data of compound **2r** has been deposited in CCDC with number 2175166 and has been displayed at 50% ellipsoid contour probability level.

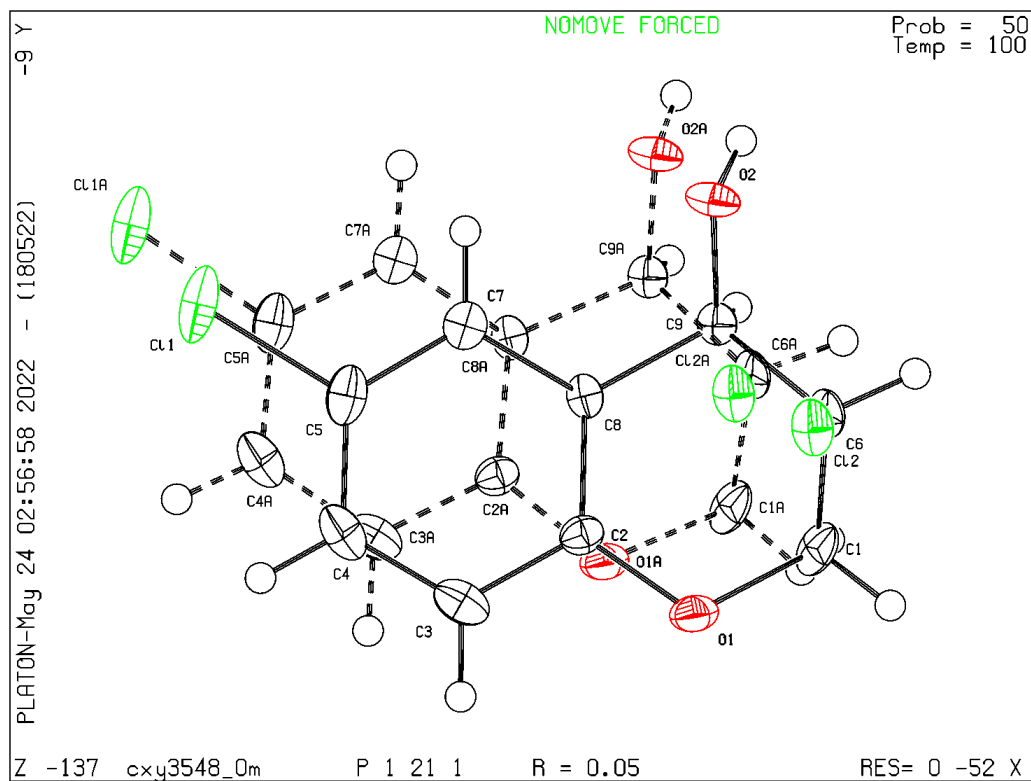

## 8. References

1. (a) Stavber, S.; Jereb, M.; Zupan, M. Direct  $\alpha$ -Fluorination of Ketones Using N-F Reagents. *Synthesis* **2002**, 2609. (b) Zhao, Y.; Pan, Y.; Liu, H.; Yang, Y.; Jiang, Z.; Tan, C.-H. Fluorinated Aromatic Ketones as Nucleophiles in the Asymmetric Organocatalytic Formation of C-C and C-N Bonds: A Facile Route to the Construction of Fluorinated Quaternary Stereogenic Centers. *Chem. - Eur. J.* **2011**, *17*, 3571.
2. Dai, Y.; Meng, W.; Feng, X.; Du, H. Chiral FLP-catalyzed asymmetric hydrogenation of 3-fluorinated chromones. *Chem. Commun.*, **2022**, *58*, 1558.
3. Molina-Betancourt, R.; Phansavath, P.; Ratovelomanana-Vidal, V. Ru(II)-Catalyzed Asymmetric Transfer Hydrogenation of 3-Fluorochromanone Derivatives to Access Enantioenriched cis-3-Fluorochroman-4-ols through Dynamic Kinetic Resolution. *J. Org. Chem.* **2021**, *86*, 12054.
4. Wood, S. H.; Etridge, S.; Kennedy, A. R.; Percy, J. M.; Nelson, D. J. The Electrophilic Fluorination of Enol Esters Using SelectFluor: A Polar Two-Electron Process. *Chem. Eur. J.* **2019**, *25*, 5574.
5. Bacheley, L.; Molina-Betancourt, R.; Ravindra, R.; Guillamot, G.; Phansavath, P.; Ratovelomanana-Vidal, V. Asymmetric Synthesis of Monofluorinated Carbocyclic Alcohols and Vicinal Difluorinated Heterocycles and Carbocycles.
6. Mei, Y.; Bentley, P. A.; Du, J. Thiourea catalysis of NCS in the synthesis of  $\alpha$ -chloroketones. *Tetrahedron Lett.* **2008**, *49*, 3802.
7. Touge, T.; Nara, H.; Kida, M.; Matsumura, K.; Kayaki, Y. Convincing Catalytic Performance of Oxo-Tethered Ruthenium Complexes for Asymmetric Transfer Hydrogenation of Cyclic  $\alpha$ -Halogenated Ketones through Dynamic Kinetic Resolution. *Org. Lett.* **2021**, *23*, 3070.
8. Ros, A.; Magriz, A.; Dietrich, H.; Fernández, R.; Alvarez, E.; Lassaletta, J. M. Enantioselective Synthesis of Vicinal Halohydrins via Dynamic Kinetic Resolution. *Org. Lett.* **2006**, *8*, 127.
9. Bacheley, L.; Molina-Betancourt, R.; Ravindra, R.; Guillamot, G.; Phansavath, P;

Ratovelomanana-Vidal, V. Asymmetric Synthesis of Monofluorinated Carbocyclic Alcohols and Vicinal Difluorinated Heterocycles and Carbocycles. *Eur. J. Org. Chem.* **2023**, 26, e2023003.

10. Hou, M.; Lin, L.; Chai, X.; Zhao, X.; Qiao, B.; Jiang, Z. Enantioselective photoredox dehalogenative protonation. *Chem. Sci.*, **2019**, 10, 6629.

11. Li, Z.; Wang, B.; Zhang, C.; Lo, W. Y.; Yang, L; Sun, J. Catalytic Enantioselective Nucleophilic  $\alpha$ -Chlorination of Ketones with NaCl. *J. Am. Chem. Soc.* **2024**, 146, 2779.
